# Supplementary material for: Correlation between lipophilicity of newly synthesized ionic liquids and selected Fusarium genus growth rate
Source: PubMed Central journal article supplement — RSC Adv. 2019 Jun 18;9(33):19189–96. doi: 10.1039/c9ra02521a (PMC9065092; doi:10.1039/c9ra02521a), 2019-06-18
Supplement: RA-009-C9RA02521A-s001.pdf [file RA-009-C9RA02521A-s001.pdf]

## Supporting Information

### **Correlation between lipophilicity of newly synthesized ionic liquids and selected *Fusarium* genus growth rate**

Milan Vraneš<sup>1</sup>, Aleksandar Tot<sup>1\*</sup>, Jasenka Ćosić<sup>2</sup>, Snežana Papović<sup>1</sup>, Jovana Panić<sup>1</sup>,  
Slobodan Gadžurić<sup>1</sup>, Nenad Janković<sup>3</sup>, Karolina Vrandečić<sup>2</sup>

<sup>1</sup>*Faculty of Sciences, Department of Chemistry, Biochemistry and Environmental Protection,  
University of Novi Sad, Trg Dositeja Obradovića 3, 21000 Novi Sad, Serbia*

<sup>2</sup>*Faculty of Agrobiotechnical Sciences in Osijek, University of Josip Juraj Strossmayer in  
Osijek, Vladimira Preloga 1, 31000 Osijek, Croatia*

<sup>3</sup>*Department of Chemistry, University of Kragujevac, Faculty of Science, Radoja  
Domanovića 12, 34000 Kragujevac, Serbia*

---

\*Corresponding Author: Tel: +381 21 485 2751; Fax: +381 21 454 065; E-mail: [aleksandar.tot@dh.uns.ac.rs](mailto:aleksandar.tot@dh.uns.ac.rs)

**Table S1.** Provenance and purity of the chemicals.

| Chemical name                              | Provenance     | CAS Number | Purification method | Mass fraction purity |
|--------------------------------------------|----------------|------------|---------------------|----------------------|
| 2-methylpyridine                           | Alfa Aesar     | 109-06-8   | -                   | $\omega \geq 0.98$   |
| 3-methylpyridine                           | Acros Organics | 108-99-6   | -                   | $\omega \geq 0.99$   |
| 4-methylpyridine                           | Acros Organics | 108-89-4   | -                   | $\omega \geq 0.99$   |
| 3-chloro-1-propanol                        | Aldrich        | 627-30-5   | -                   | $\omega \geq 0.98$   |
| 1-bromobutane                              | Sigma Aldrich  | 109-65-9   | -                   | $\omega \geq 0.99$   |
| Toluene                                    | Sigma Aldrich  | 108-88-3   | -                   | $\omega \geq 0.995$  |
| Ethyl-acetate                              | Sigma Aldrich  | 141-78-6   | -                   | $\omega \geq 0.99$   |
| P <sub>2</sub> O <sub>5</sub> <sup>a</sup> | Sigma Aldrich  | 1314-56-3  | -                   | $\omega \geq 0.99$   |
| Amberlite IRN 78                           | Supelco        | 11128-95-3 | -                   | -                    |
| ( <i>RS</i> )-Mandelic acid                | Sigma Aldrich  | 90-64-2    | -                   | $\omega \geq 0.99$   |
| Caffeic acid                               | Sigma Aldrich  | 331-39-5   | -                   | $\omega \geq 0.98$   |
| trans-Cinnamic acid                        | Sigma Aldrich  | 140-10-3   | -                   | $\omega \geq 0.99$   |

<sup>a</sup>P<sub>2</sub>O<sub>5</sub>= phosphorus pentoxide

**Table S2.** Structures of investigated ILs

| Abbreviation                   | Name                                             | Structure                                                                            | Purity* |
|--------------------------------|--------------------------------------------------|--------------------------------------------------------------------------------------|---------|
| [C <sub>4</sub> -2mpyc][Br]    | 1-butyl-2-methylpycolinium bromide               | 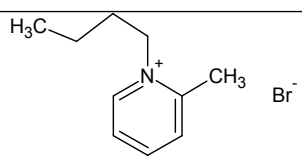   | 0.95    |
| [C <sub>4</sub> -3mpyc][Br]    | 1-butyl-3-methylpycolinium bromide               |    | 0.96    |
| [C <sub>4</sub> -4mpyc][Br]    | 1-butyl-4-methylpycolinium bromide               |    | 0.96    |
| [OHC <sub>3</sub> -2mpyc][Cl]  | 1-(3-hydroxypropyl)-2-methylpycolinium chloride  |    | 0.97    |
| [OHC <sub>3</sub> -3mpyc][Cl]  | 1-(3-hydroxypropyl)-3-methylpycolinium chloride  |   | 0.96    |
| [OHC <sub>3</sub> -4mpyc][Cl]  | 1-(3-hydroxypropyl)-4-methylpycolinium chloride  |  | 0.97    |
| [OHC <sub>3</sub> -2mpyc][Cin] | 1-(3-hydroxypropyl)-2-methylpycolinium cinnamate |  | 0.94    |
| [OHC <sub>3</sub> -3mpyc][Cin] | 1-(3-hydroxypropyl)-3-methylpycolinium cinnamate |  | 0.95    |
| [OHC <sub>3</sub> -4mpyc][Cin] | 1-(3-hydroxypropyl)-4-methylpycolinium cinnamate |  | 0.94    |
| [OHC <sub>3</sub> -2mpyc][Man] | 1-(3-hydroxypropyl)-2-methylpycolinium mandelate |  | 0.96    |

|                                 |                                                   |                                                                                      |      |
|---------------------------------|---------------------------------------------------|--------------------------------------------------------------------------------------|------|
| [OHC <sub>3</sub> -3mpyc][Man]  | 1-(3-hydroxypropyl)-3-methylpycolinium mandelate  | 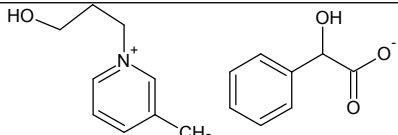   | 0.95 |
| [OHC <sub>3</sub> -4mpyc][Man]  | 1-(3-hydroxypropyl)-4-methylpycolinium mandelate  |    | 0.93 |
| [OHC <sub>3</sub> -2mpyc][Caff] | 1-(3-hydroxypropyl)-2-methylpycolinium caffeate   |    | 0.92 |
| [OHC <sub>3</sub> -3mpyc][Caff] | 1-(3-hydroxypropyl)-3-methylpycolinium caffeate   |    | 0.93 |
| [OHC <sub>3</sub> -4mpyc][Caff] | 1-(3-hydroxypropyl)-4-methylpycolinium caffeate   |    | 0.92 |
| [bmim][Cl]                      | 1-butyl-3-methylimidazolium chloride              |   |      |
| [bmim][Cin]                     | 1-butyl-3-methylimidazolium cinnamate             |  | 0.96 |
| [bmim][Man]                     | 1-butyl-3-methylimidazolium mandelate             |  | 0.97 |
| [bmim][Caff]                    | 1-butyl-3-methylimidazolium caffeate              |  | 0.95 |
| [OHC <sub>3</sub> mim][Cl]      | 1-(3-hydroxypropyl)-3-methylimidazolium chloride  |  | 0.98 |
| [OHC <sub>3</sub> mim][Cin]     | 1-(3-hydroxypropyl)-3-methylimidazolium cinnamate |  | 0.95 |
| [OHC <sub>3</sub> mim][Man]     | 1-(3-hydroxypropyl)-3-methylimidazolium mandelate |  | 0.96 |
| [OHC <sub>3</sub> mim][Caff]    | 1-(3-hydroxypropyl)-3-methylimidazolium caffeate  |  | 0.94 |

\*Obtained from NMR spectra

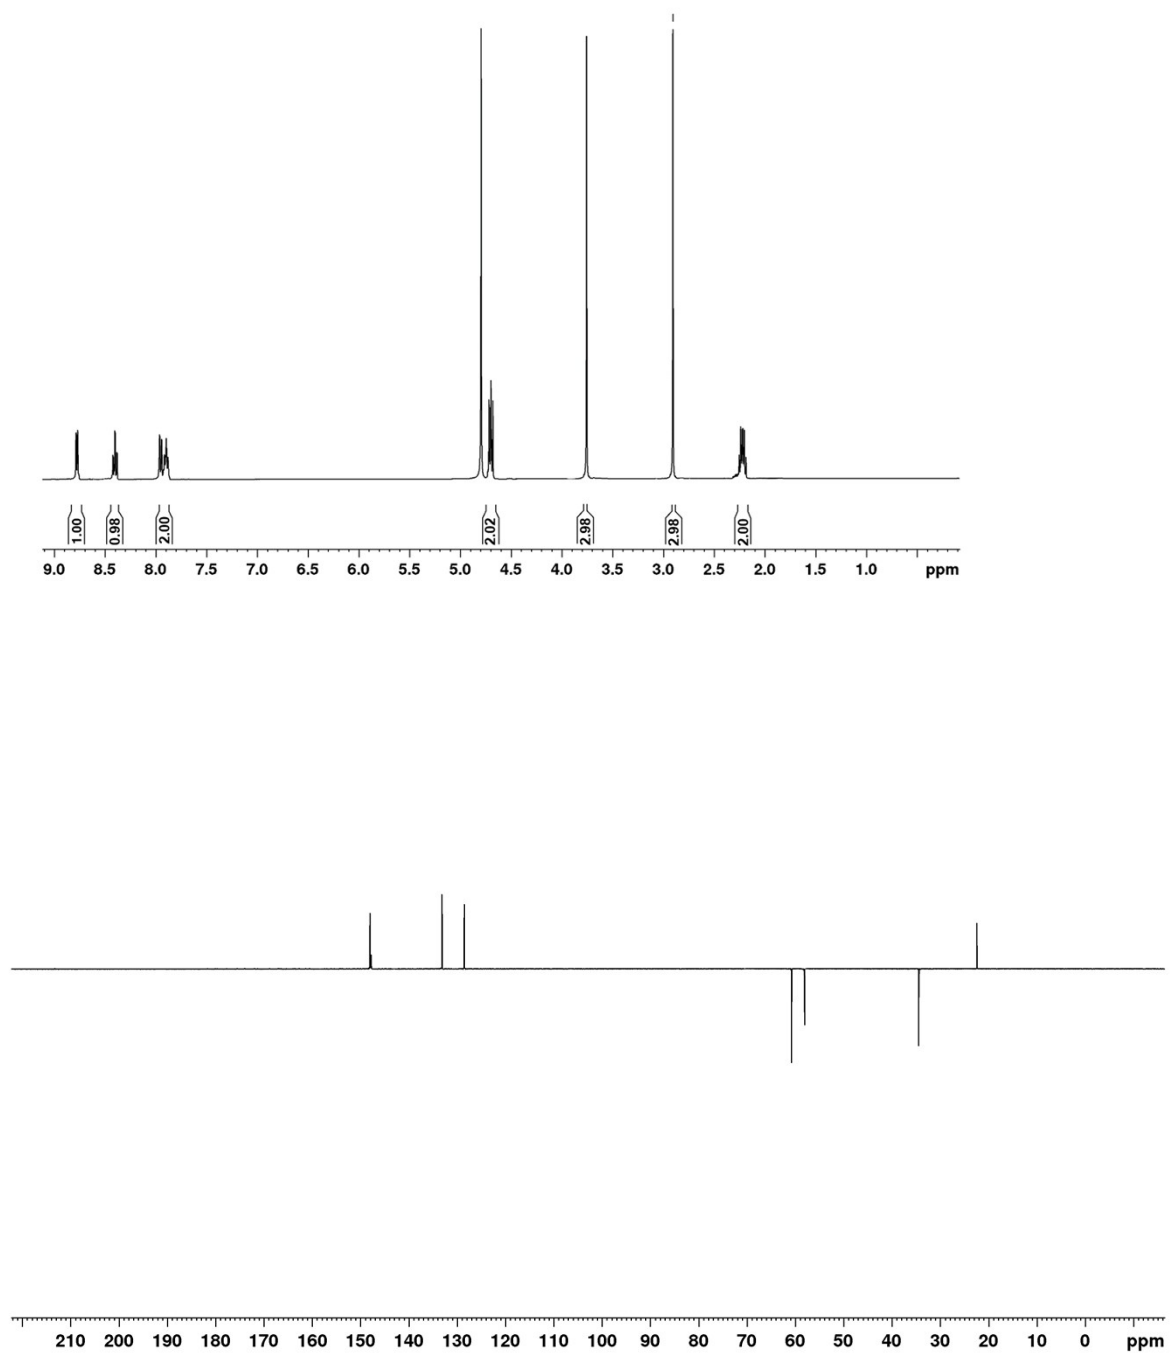

**Figure S1.** <sup>1</sup>H and <sup>13</sup>C NMR spectra for synthesized [C<sub>4</sub>-2mpyc][Br]

<sup>1</sup>H NMR (D<sub>2</sub>O): 2.22 (*m*, 2H, CH<sub>2</sub>-2'), 2.91 (*s*, 3H, CH<sub>3</sub>), 3.75 (*t*, 3H, CH<sub>3</sub>), 4.70 (*t*, 2H, *J*<sub>1',2'</sub> = 7.2 Hz, CH<sub>2</sub>-1'), 7.96 (*dd*, 1H, *J*<sub>5',6'</sub> = 6.1 Hz, *J*<sub>5,6</sub> = 8.0 Hz H-5), 8.40 (*d*, 1H, *J*<sub>4,5</sub> = 8.0 Hz, H-4), 8.80 (*d*, 1H, *J*<sub>5,6</sub> = 6.1 Hz, H-6)

<sup>13</sup>C NMR (D<sub>2</sub>O): 22.41 (CH<sub>3</sub>), 34.13 (CH<sub>2</sub>-2'), 58.42 (CH<sub>3</sub>), 60.77 (CH<sub>2</sub>-1'), 128.53 (C-5); 133.12 (C-3); 144.62 (C-6); 147.81 (C-2); 149.41 (C-4)

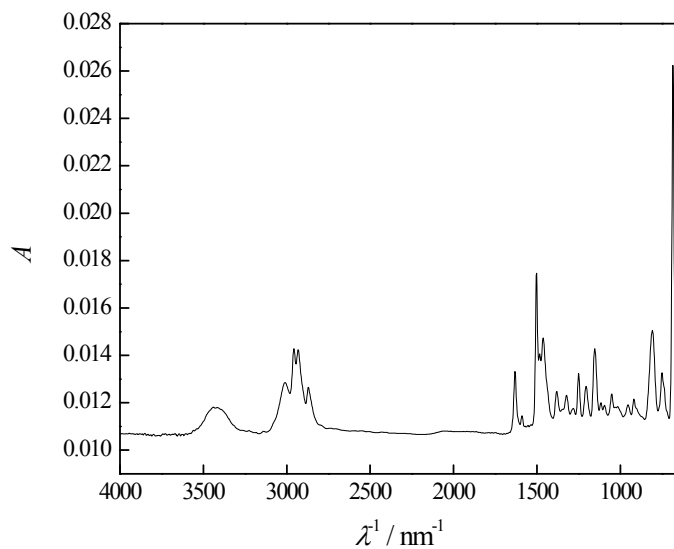

**Figure S2.** IR spectra of  $[\text{C}_4\text{-2mpic}][\text{Br}]$

3020 (CH ring sym. stretching), 2958 (asym. stretching  $\text{CH}_3$ ), 2933 and 2873 (sym. stretching  $\text{CH}_3$ ), 1574 (aromatic C-C stretching), 1485 (rocking  $\text{CH}_3$ ), 1167 (wagging  $\text{CH}_2$ ), 797 (out of plane bending vibrations of ring)

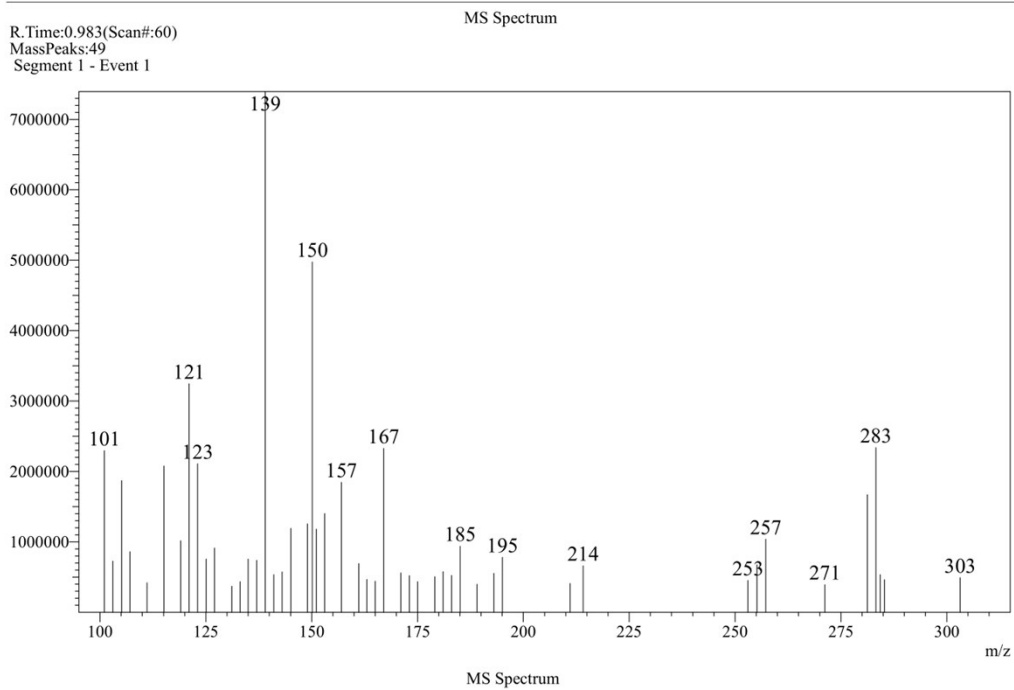

R.Time:0.983(Scan#:60)  
 MassPeaks:49  
 Segment 1 - Event 1

| m/z    | Absolute Intensity | Relative Intensity |
|--------|--------------------|--------------------|
| 101.00 | 2296475            | 31.05              |
| 103.00 | 728861             | 9.86               |
| 105.10 | 1872544            | 25.32              |
| 107.05 | 861497             | 11.65              |
| 111.10 | 420045             | 5.68               |
| 115.10 | 2079872            | 28.13              |
| 119.05 | 1019123            | 13.78              |
| 121.00 | 3247482            | 43.91              |
| 123.05 | 2109901            | 28.53              |
| 125.05 | 757034             | 10.24              |
| 127.05 | 913828             | 12.36              |

**Figure S3.** MS spectra of [C<sub>4</sub>-2mpyc][Br]



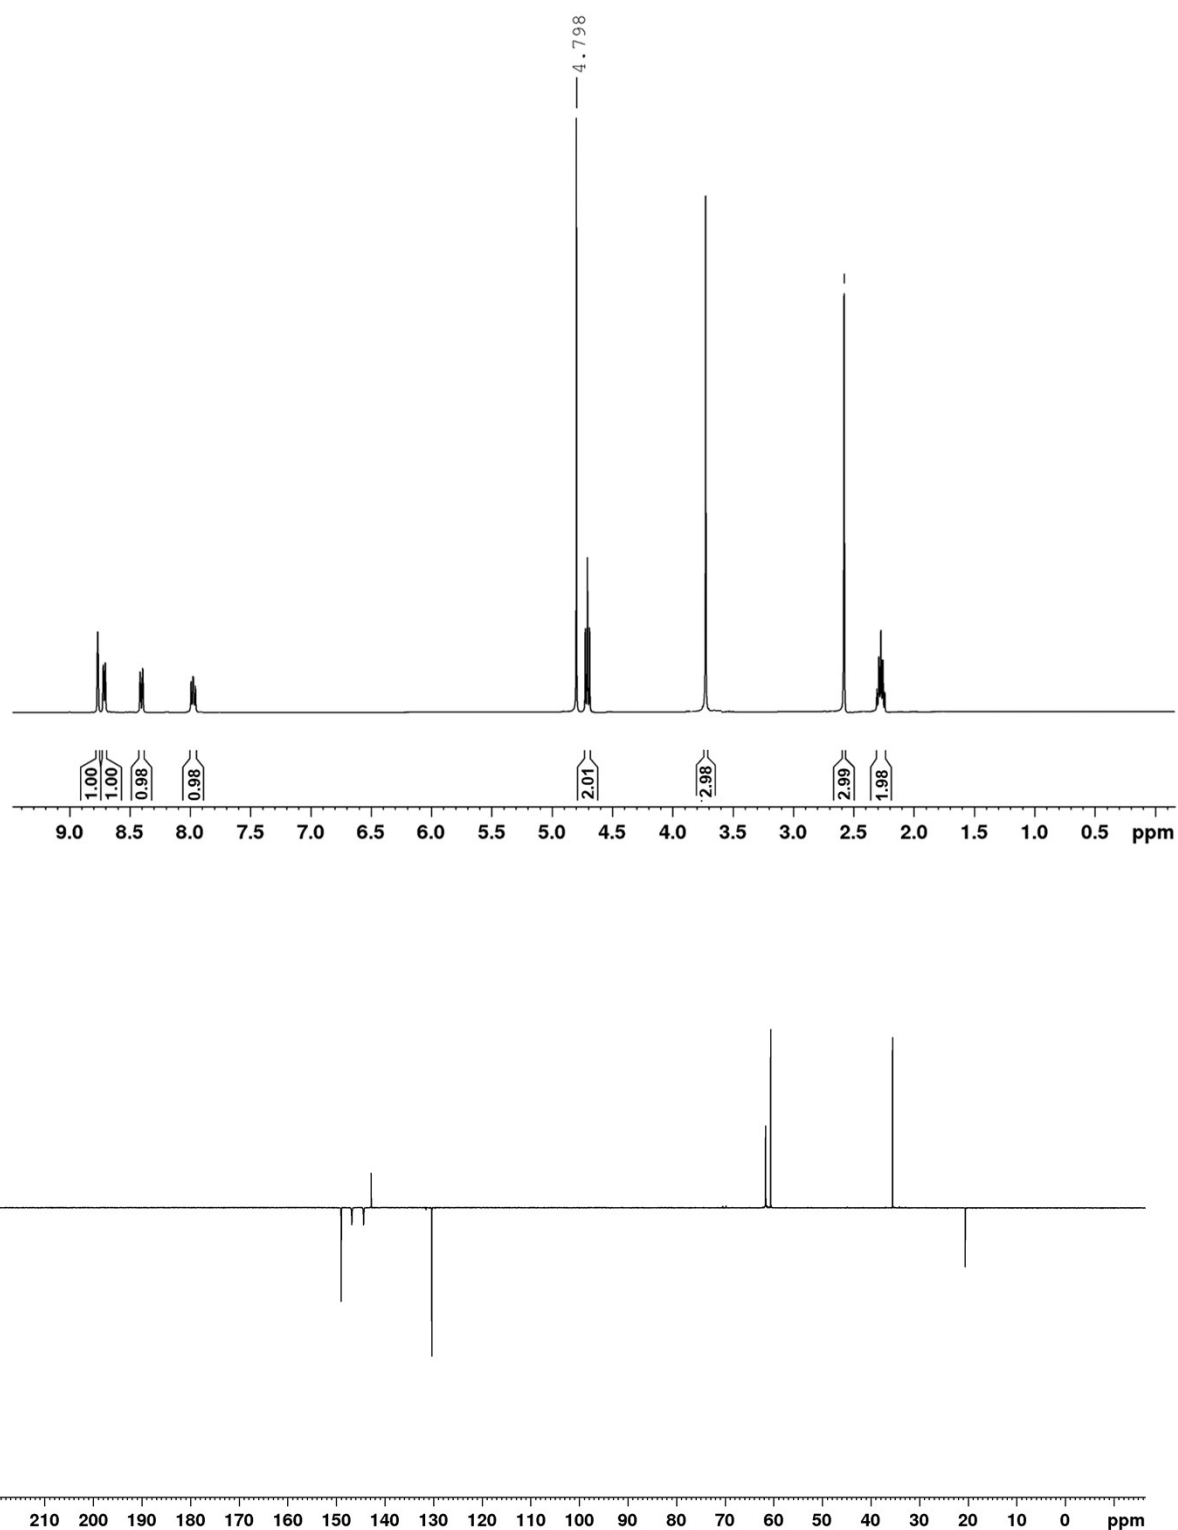

**Figure S4.** <sup>1</sup>H and <sup>13</sup>C NMR spectra for synthesized [C<sub>4</sub>-3mpyc][Br]

<sup>1</sup>H NMR (D<sub>2</sub>O): 2.27 (*m*, 2H, CH<sub>2</sub>-2'), 2.58 (*s*, 3H, CH<sub>3</sub>), 3.70 (*t*, 3H, CH<sub>3</sub>), 4.71 (*t*, 2H, *J*<sub>1',2'</sub> = 7.2 Hz, CH<sub>2</sub>-1'), 7.98 (*dd*, 1H, *J*<sub>5',6'</sub> = 6.1 Hz, *J*<sub>5,6</sub> = 8.0 Hz H-5), 8.40 (*d*, 1H, *J*<sub>4,5</sub> = 8.0 Hz, H-4), 8.71 (*d*, 1H, *J*<sub>5,6</sub> = 6.1 Hz, H-6), 8.77 (*s*, 1H, H-2)

$^{13}\text{C}$  NMR ( $\text{D}_2\text{O}$ ): 20.57 ( $\text{CH}_3$ ), 35.55 ( $\text{CH}_2\text{-}2'$ ), 60.63 ( $\text{CH}_3$ ), 61.67 ( $\text{CH}_2\text{-}1'$ ), 130.35 (C-5), 142.84 (C-3), 144.40 (C-6), 146.82 (C-2), 149.01 (C-4)

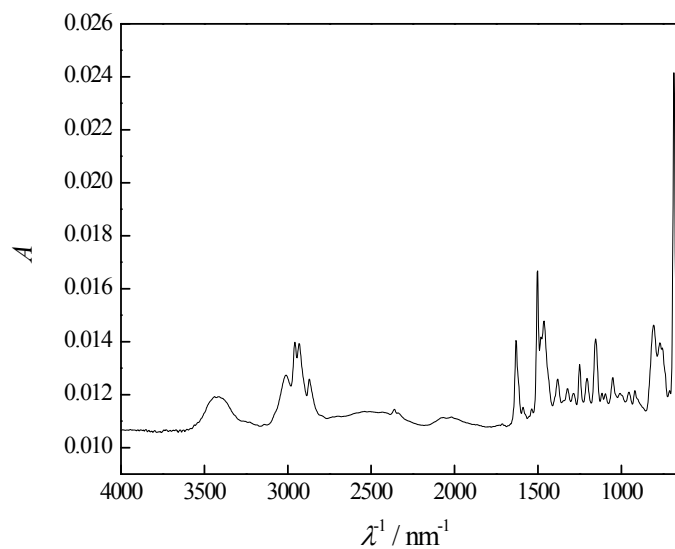

**Figure S5.** IR spectra of  $[\text{C}_4\text{-3mpic}][\text{Br}]$

3010 (CH ring sym. stretching), 2957 (asym. stretching  $\text{CH}_3$ ), 2931 and 2871 (sym. stretching  $\text{CH}_3$ ), 1584 (aromatic C-C stretching), 1503 (rocking  $\text{CH}_3$ ), 1154 (wagging  $\text{CH}_2$ ), 808 (out of plane bending vibrations of ring)

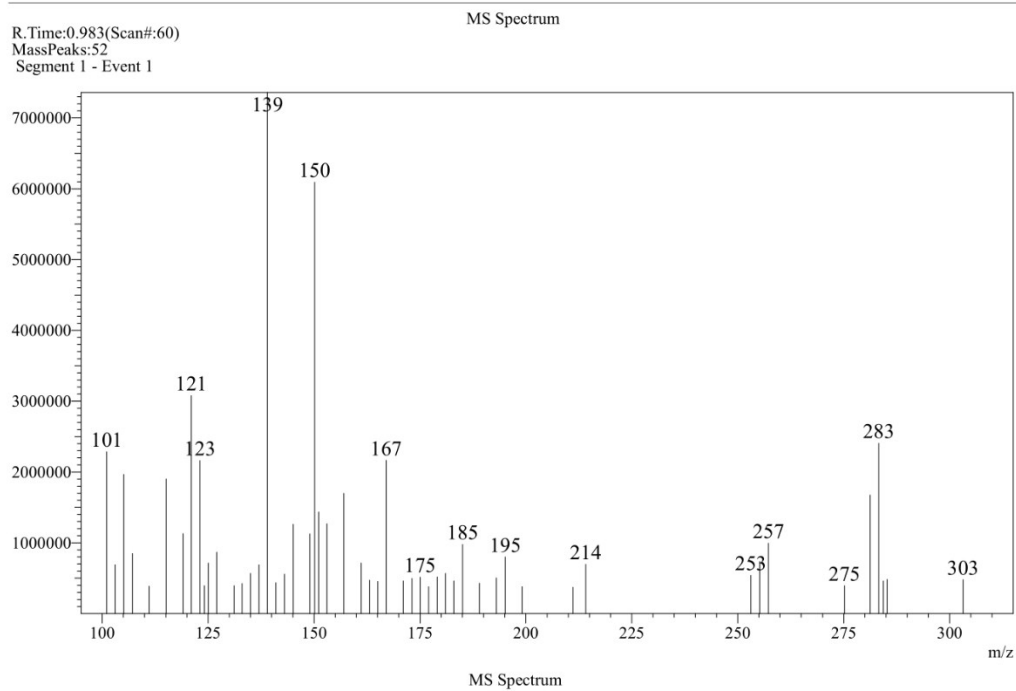

R.Time:0.983(Scan#:60)  
 MassPeaks:52  
 Segment 1 - Event 1

| m/z    | Absolute Intensity | Relative Intensity |
|--------|--------------------|--------------------|
| 101.05 | 2286439            | 31.06              |
| 103.00 | 689341             | 9.37               |
| 105.10 | 1966026            | 26.71              |
| 107.10 | 848199             | 11.52              |
| 111.05 | 388396             | 5.28               |
| 115.10 | 1902504            | 25.85              |
| 119.05 | 1132047            | 15.38              |
| 121.05 | 3077662            | 41.81              |
| 123.05 | 2163224            | 29.39              |
| 124.10 | 393752             | 5.35               |
| 125.05 | 715243             | 9.72               |

**Figure S6.** MS spectra of [C<sub>4</sub>-3mpyc][Br]

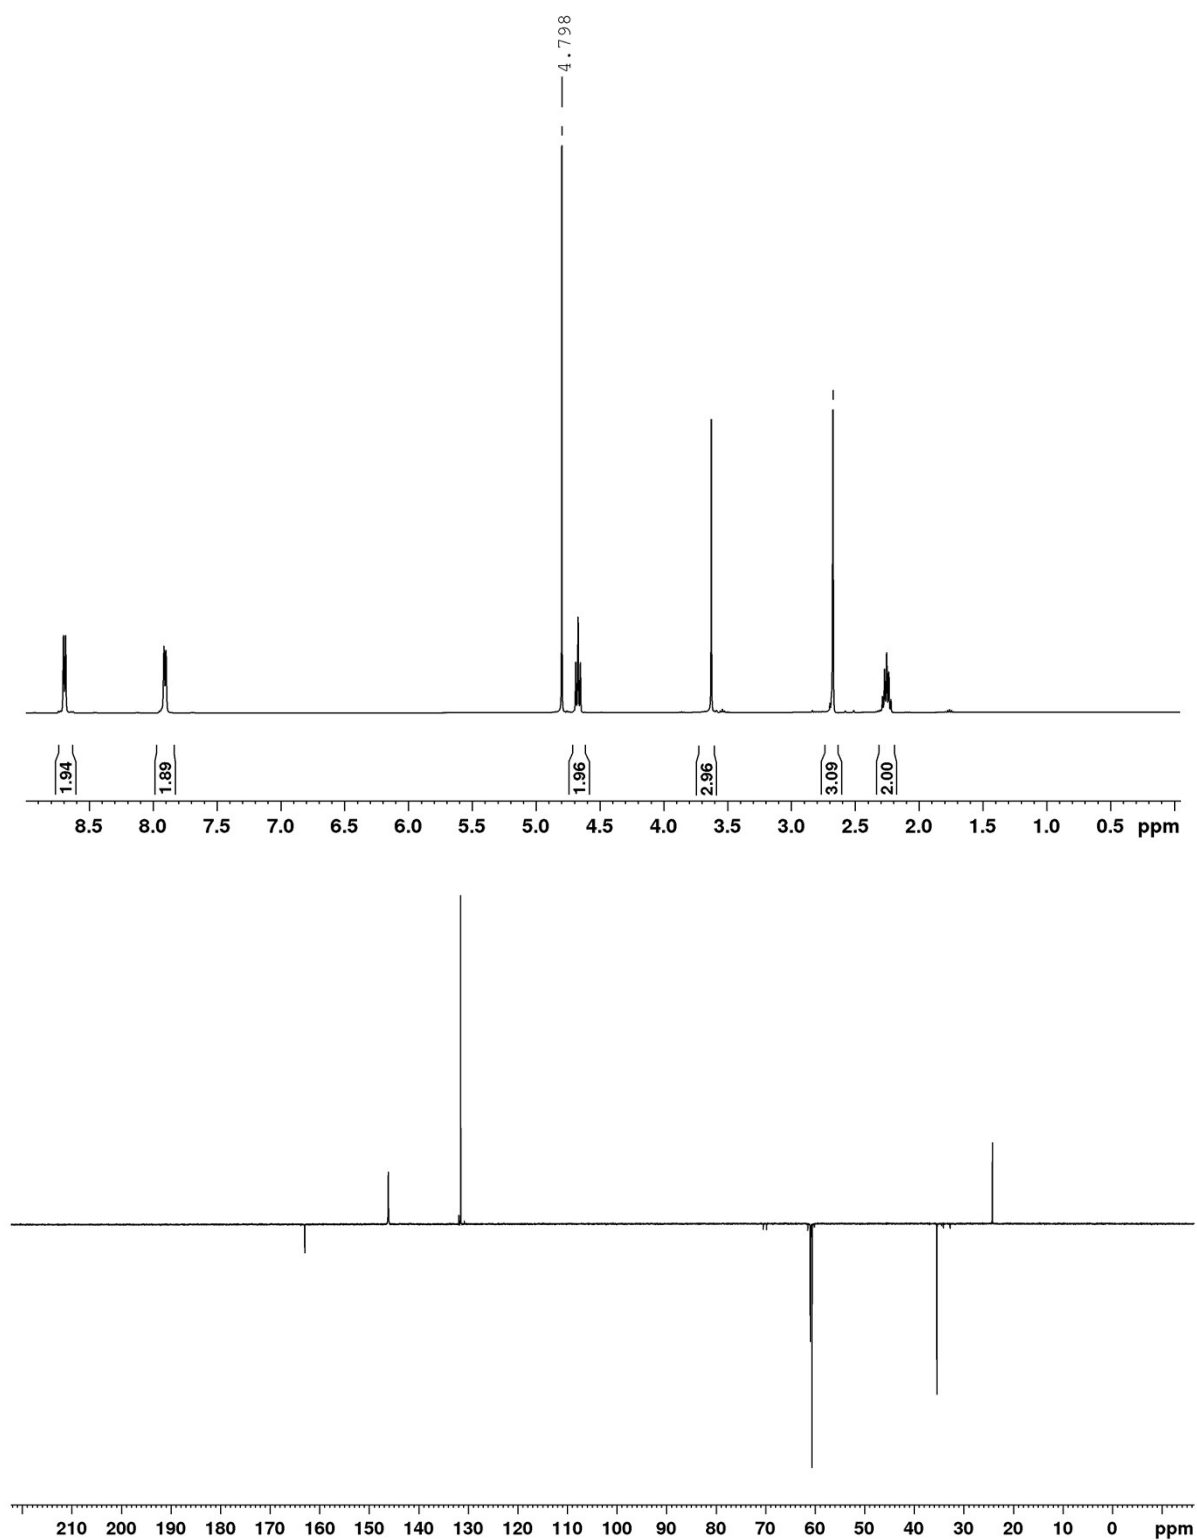

**Figure S7.** <sup>1</sup>H and <sup>13</sup>C NMR spectra for synthesized [C<sub>4</sub>-4mpic][Br]

<sup>1</sup>H NMR (D<sub>2</sub>O): 2.25 (*m*, 2H, CH<sub>2</sub>-2'), 2.67 (*s*, 3H, CH<sub>3</sub>), 3.68 (*t*, 3H, CH<sub>3</sub>), 4.67 (*t*, 2H, *J*<sub>1',2'</sub> = 7.3 Hz, CH<sub>2</sub>-1'), 7.91 (*d*, 1H, *J* = 6.3 Hz, H-3 and H-5), 8.69 (*d*, 1H, *J* = 6.3 Hz, H-2 and H-6)

$^{13}\text{C}$  NMR ( $\text{D}_2\text{O}$ ): 24.20 ( $\text{CH}_3$ ), 35.42 ( $\text{CH}_2\text{-2'}$ ), 60.62 ( $\text{CH}_3$ ), 60.95 ( $\text{CH}_2\text{-1'}$ ), 131.55 (C3 and C-5), 146.14 (C-2 and C-6), 163.00 (C-4)

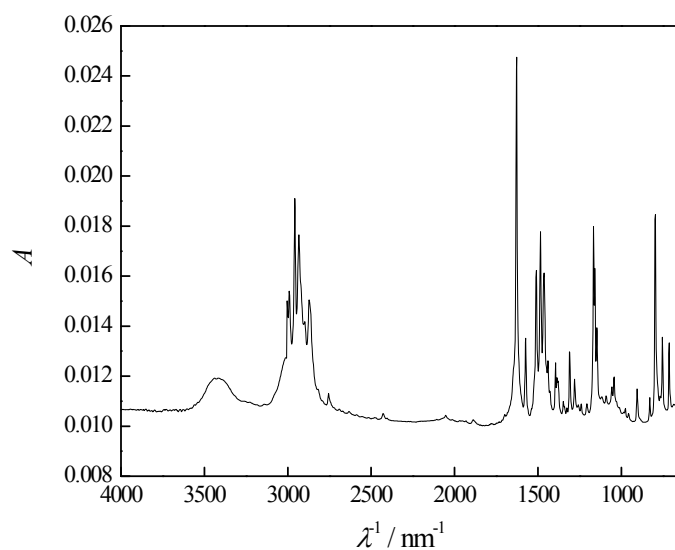

**Figure S8.** IR spectra of [C<sub>4</sub>-4mpic][Br]

3018 (CH ring sym. stretching), 2961 (asym. stretching  $\text{CH}_3$ ), 2935 and 2873 (sym. stretching  $\text{CH}_3$ ), 1564 (aromatic C-C stretching), 1472 (rocking  $\text{CH}_3$ ), 1174 (wagging  $\text{CH}_2$ ), 833 (out of plane bending vibrations of ring)

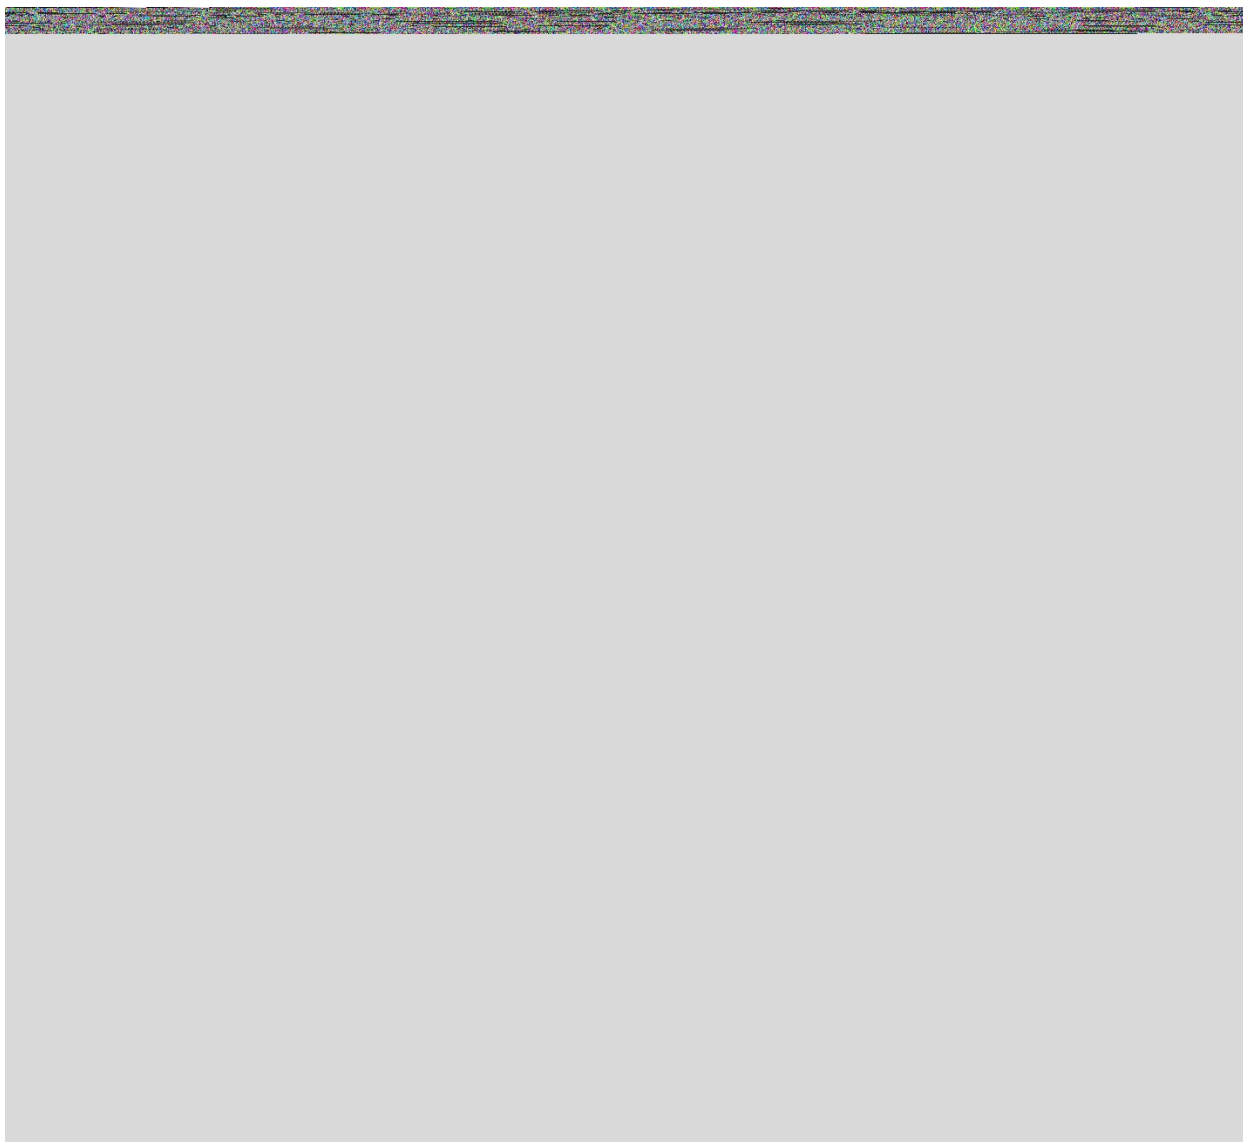

**Figure S9.** MS spectra of [C<sub>4</sub>-4mpyc][Br]

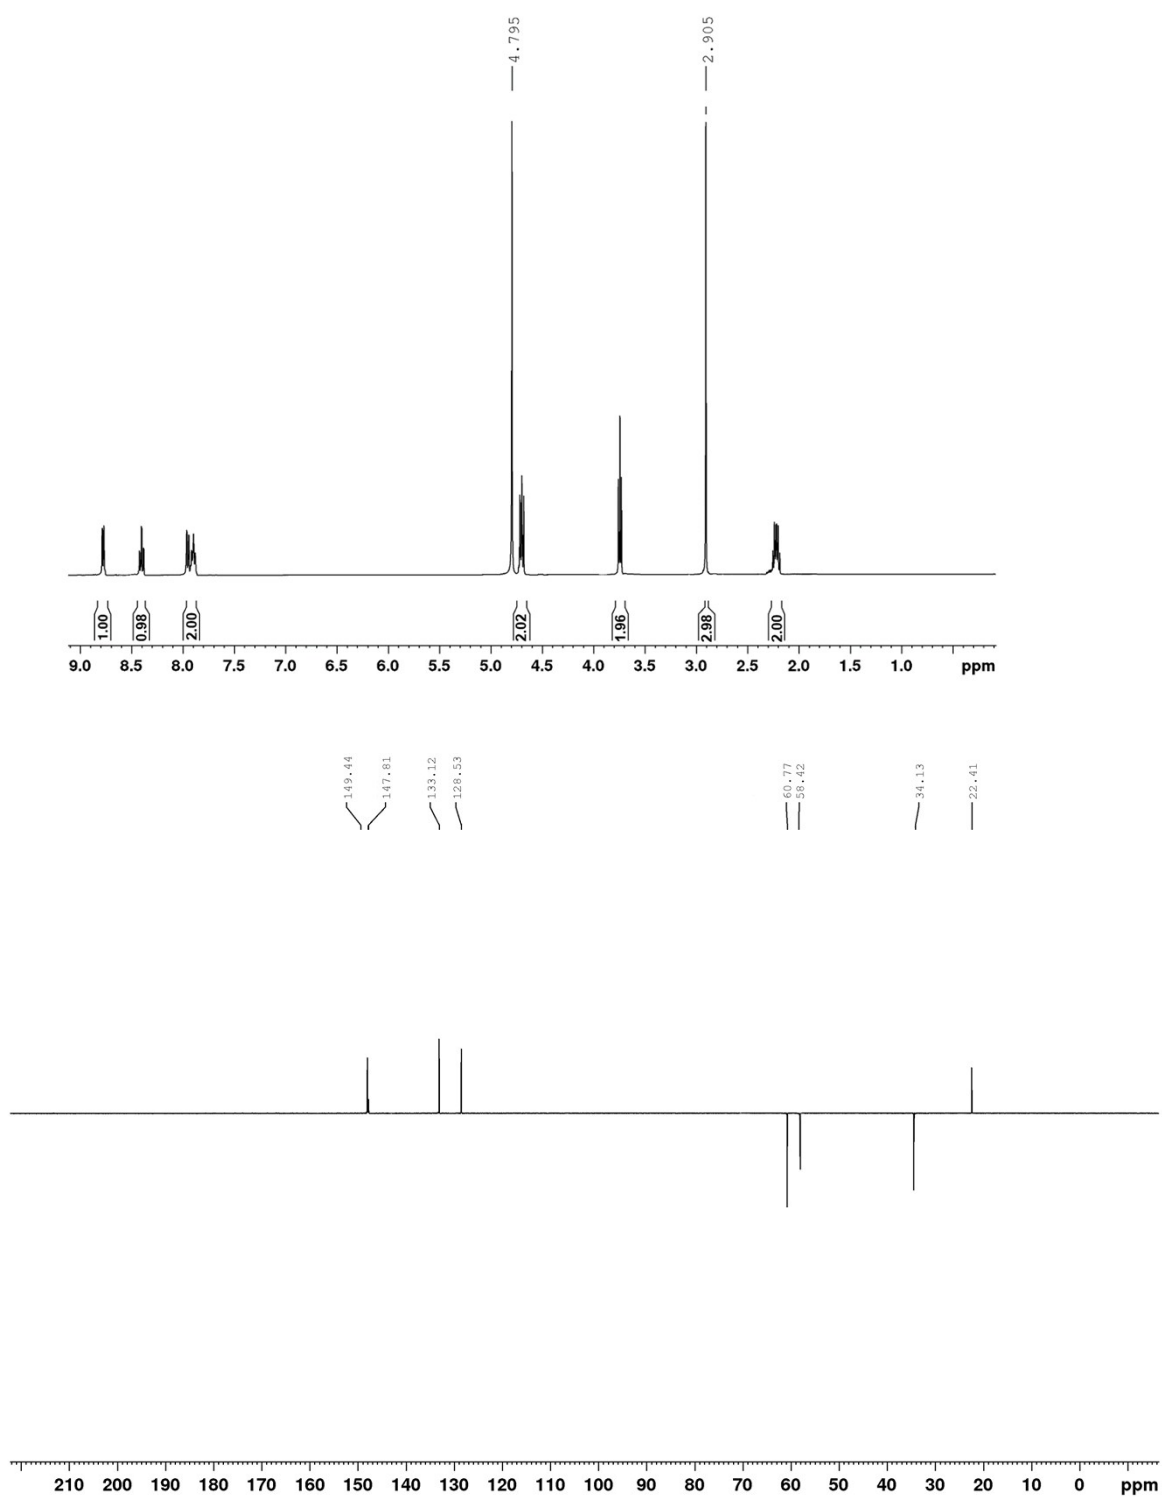

**Figure S10.** <sup>1</sup>H and <sup>13</sup>C NMR spectra for synthesized [OHC<sub>3</sub>-2mpyc][Cl]

<sup>1</sup>H NMR (D<sub>2</sub>O): 2.22 (*m*, 2H, CH<sub>2</sub>-2'), 2.91 (*s*, 3H, CH<sub>3</sub>), 3.75 (*t*, 2H, *J*<sub>2',3'</sub> = 6.0 Hz, CH<sub>2</sub>OH), 4.70 (*t*, 2H, *J*<sub>1',2'</sub> = 7.2 Hz, CH<sub>2</sub>-1'), 7.96 (*dd*, 1H, *J*<sub>5',6'</sub> = 6.1 Hz, *J*<sub>5,6</sub> = 8.0 Hz H-5), 8.40 (*d*, 1H, *J*<sub>4,5</sub> = 8.0 Hz, H-4), 8.80 (*d*, 1H, *J*<sub>5,6</sub> = 6.1 Hz, H-6)

$^{13}\text{C}$  NMR ( $\text{D}_2\text{O}$ ): 22.41 ( $\text{CH}_3$ ), 34.13 ( $\text{CH}_2\text{-}2'$ ), 58.42 ( $\text{HOCH}_2$ ), 60.77 ( $\text{CH}_2\text{-}1'$ ), 128.53 (C-5); 133.12 (C-3); 144.62 (C-6); 147.81 (C-2); 149.41 (C-4)

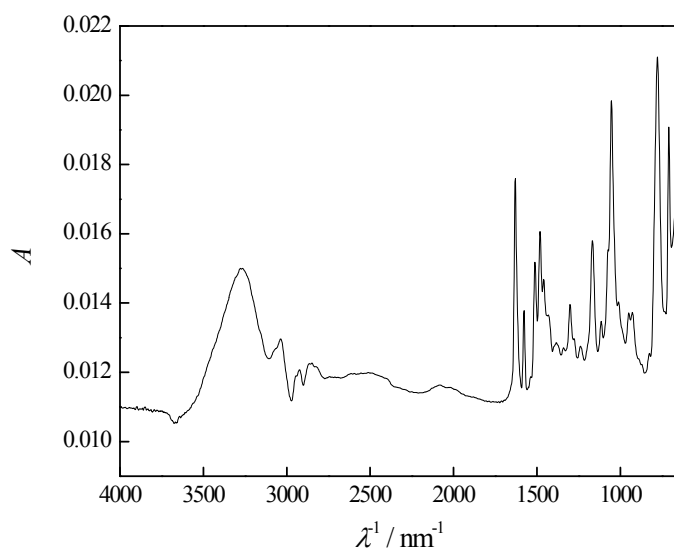

**Figure S11.** IR spectra of [OHC<sub>3</sub>-2mpyc][Cl]

3265 (OH stretching); 3037 (CH sym. stretching); 2848 (sym. vibrations of CO-H); 1630 (OH bending); 1577 (aromatic C-C stretching); 1481 (rocking  $\text{CH}_3$ ); 1301 and 1239 and 1239 ( $\text{C}_{\text{aromatic}}\text{-C}_{\text{alifatic}}$  or C- $\text{CH}_3$  stretching vibrations); 1167 and 1282 (wagging  $\text{CH}_2$  (hydroxypropile)); 1063 (skeletal vibrations of the ring); 928 (out-of-plane bending vibrations CH (ring)).



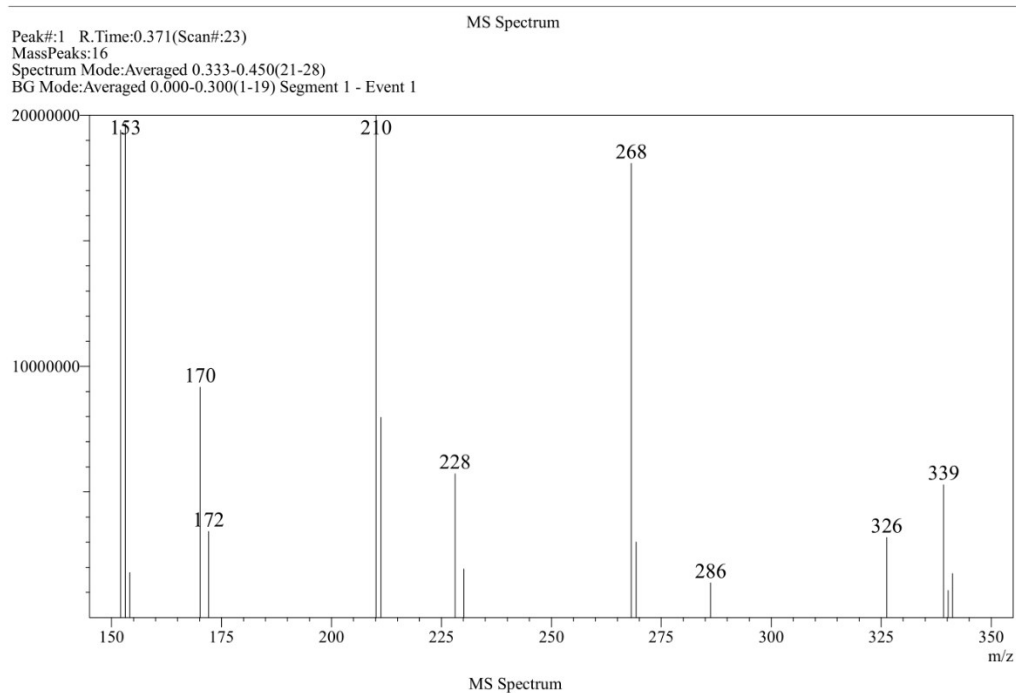

Peak#:1 R.Time:0.371(Scan#:23)  
 MassPeaks:16  
 Spectrum Mode:Averaged 0.333-0.450(21-28)  
 BG Mode:Averaged 0.000-0.300(1-19) Segment 1 - Event 1

| m/z    | Absolute Intensity | Relative Intensity |
|--------|--------------------|--------------------|
| 152.05 | 19408247           | 97.04              |
| 153.10 | 19651142           | 98.26              |
| 154.15 | 1796907            | 8.98               |
| 170.10 | 9177402            | 45.89              |
| 172.10 | 3433027            | 17.17              |
| 210.15 | 20000000           | 100.00             |
| 211.20 | 7970537            | 39.85              |
| 228.10 | 5725946            | 28.63              |

**Figure S12.** MS spectra of [OHC<sub>3</sub>-2mpyc][Cl]

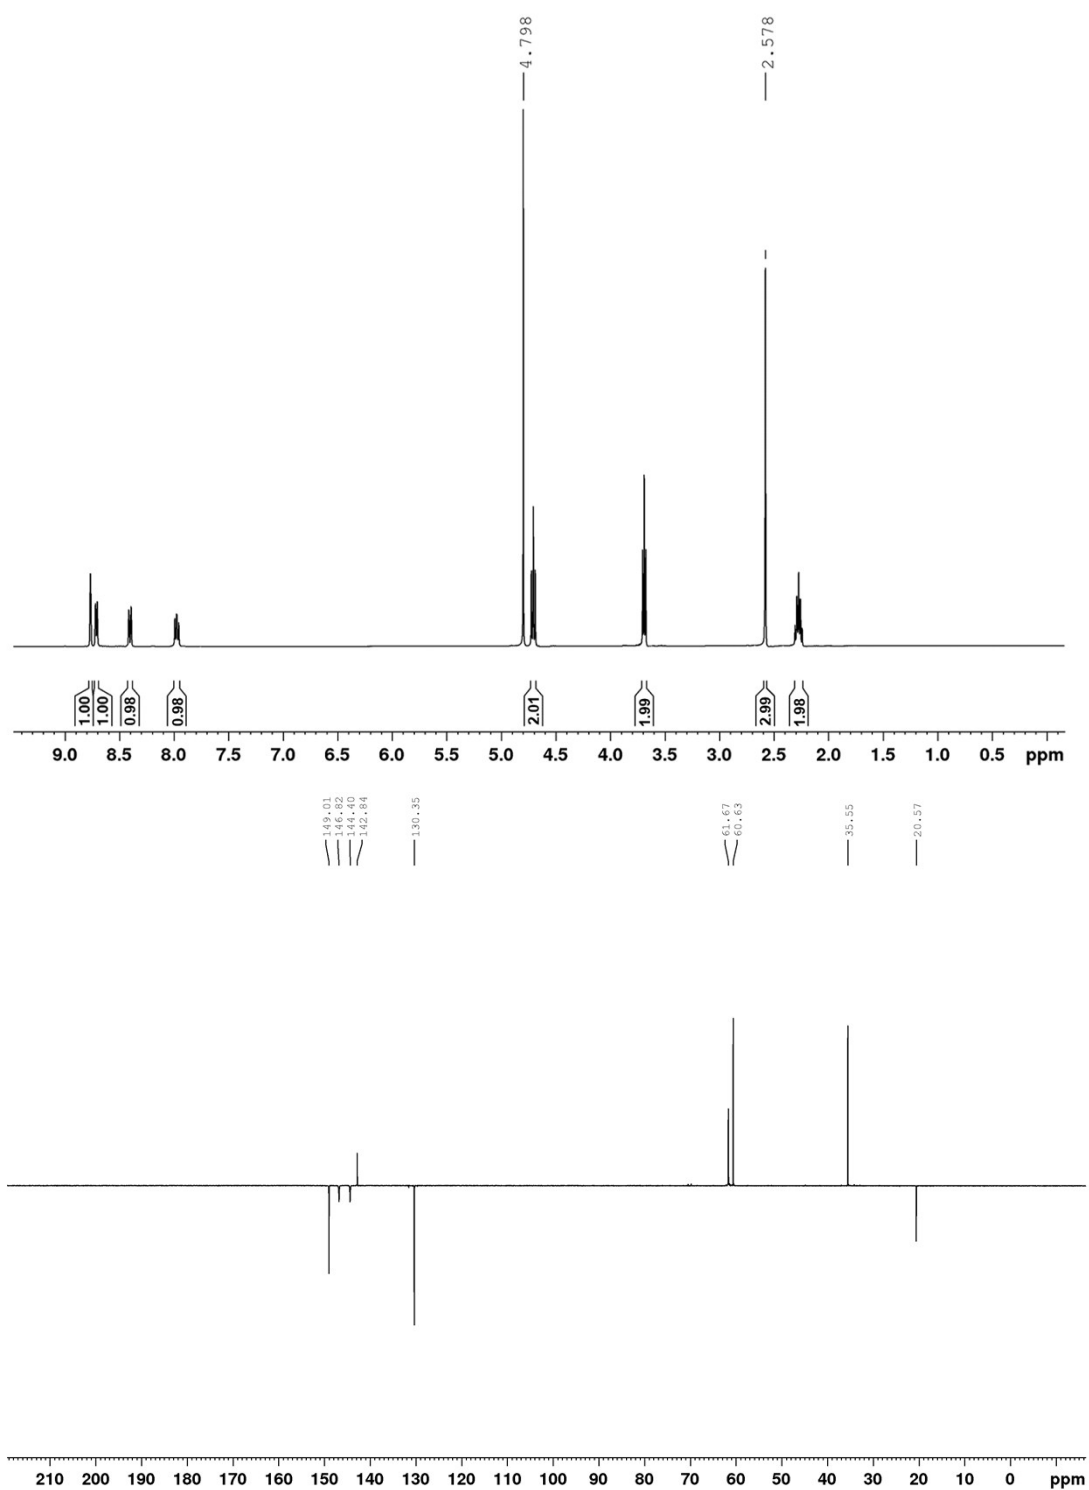

**Figure S13.** <sup>1</sup>H and <sup>13</sup>C NMR spectra for synthesized [OHC<sub>3</sub>-3mpyc][Cl]

<sup>1</sup>H NMR (D<sub>2</sub>O): 2.27 (*m*, 2H, CH<sub>2</sub>-2'), 2.58 (*s*, 3H, CH<sub>3</sub>), 3.70 (*t*, 2H, *J*<sub>2,3'</sub> = 6.0 Hz, CH<sub>2</sub>OH), 4.71 (*t*, 2H, *J*<sub>1,2'</sub> = 7.2 Hz, CH<sub>2</sub>-1'), 7.98 (*dd*, 1H, *J*<sub>5',6'</sub> = 6.1 Hz, *J*<sub>5,6</sub> = 8.0 Hz H-5), 8.40 (*d*, 1H, *J*<sub>4,5</sub> = 8.0 Hz, H-4), 8.71 (*d*, 1H, *J*<sub>5,6</sub> = 6.1 Hz, H-6), 8.77 (*s*, 1H, H-2)

$^{13}\text{C}$  NMR ( $\text{D}_2\text{O}$ ): 20.57 ( $\text{CH}_3$ ), 35.55 ( $\text{CH}_2\text{-2}'$ ), 60.63 ( $\text{HOCH}_2$ ), 61.67 ( $\text{CH}_2\text{-1}'$ ), 130.35 (C-5), 142.84 (C-3), 144.40 (C-6), 146.82 (C-2), 149.01 (C-4)

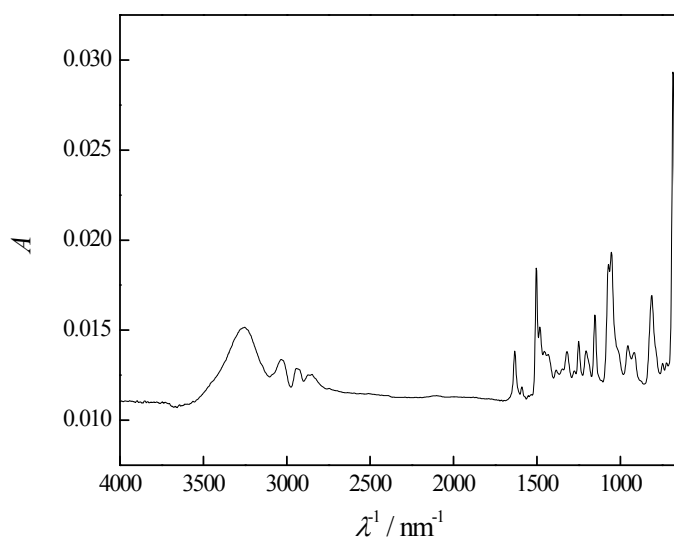

**Figure S14.** FTIR spectra of [OHC<sub>3</sub>-3mpyc][Cl]

3032 (CH sym. stretching); 2849 (sym. vibrations of CO-H); 2941 (sym. and asym. vibrations of  $\text{CH}_3$  group); 1633 (OH bending); 1590 (aromatic C-C stretching); 1482 (rocking  $\text{CH}_3$ ); 1320 and 1249 ( $\text{C}_{\text{aromatic}}\text{-C}_{\text{alifatic}}$  or C- $\text{CH}_3$  stretching vibrations); 1152 and 1282 (wagging  $\text{CH}_2$  (hydroxypropile)); 1053 (skeletal vibrations of the ring); 827 (out-of-plane bending vibrations CH (ring)).

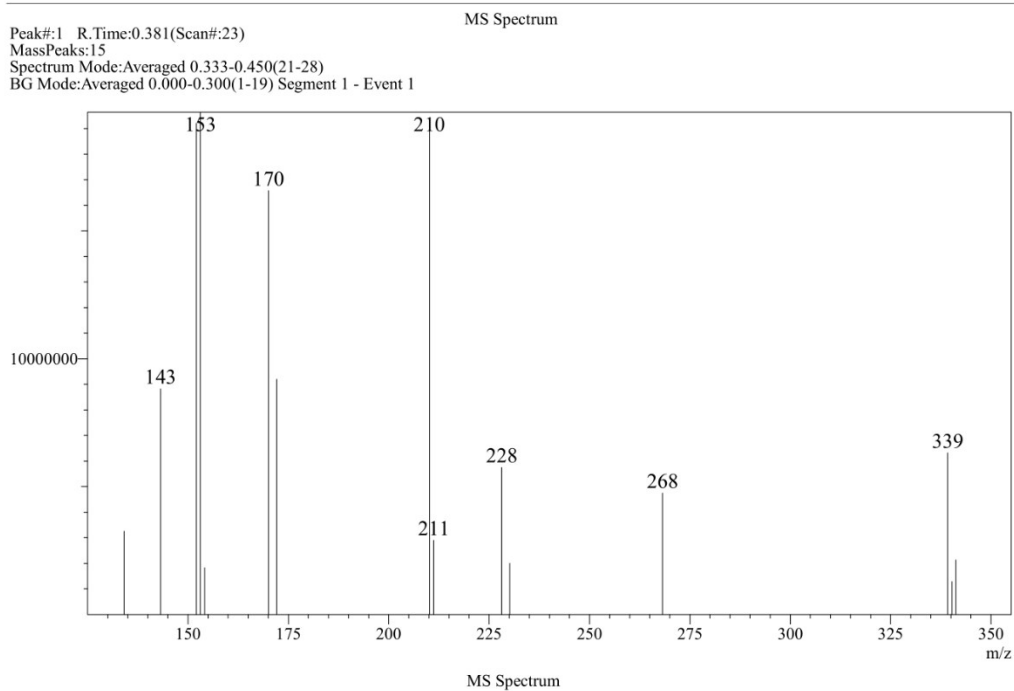

Peak#:1 R.Time:0.381(Scan#:23)  
 MassPeaks:15  
 Spectrum Mode:Averaged 0.333-0.450(21-28)  
 BG Mode:Averaged 0.000-0.300(1-19) Segment 1 - Event 1

| m/z    | Absolute Intensity | Relative Intensity |
|--------|--------------------|--------------------|
| 134.10 | 3255965            | 16.58              |
| 143.15 | 8826138            | 44.93              |
| 152.05 | 19204150           | 97.77              |
| 153.10 | 19642215           | 100.00             |
| 154.15 | 1829813            | 9.32               |
| 170.10 | 16580235           | 84.41              |
| 172.10 | 9199835            | 46.84              |
| 210.15 | 19061720           | 97.04              |

**Figure S15.** MS spectra of [OHC<sub>3</sub>-3mpyc][Cl]

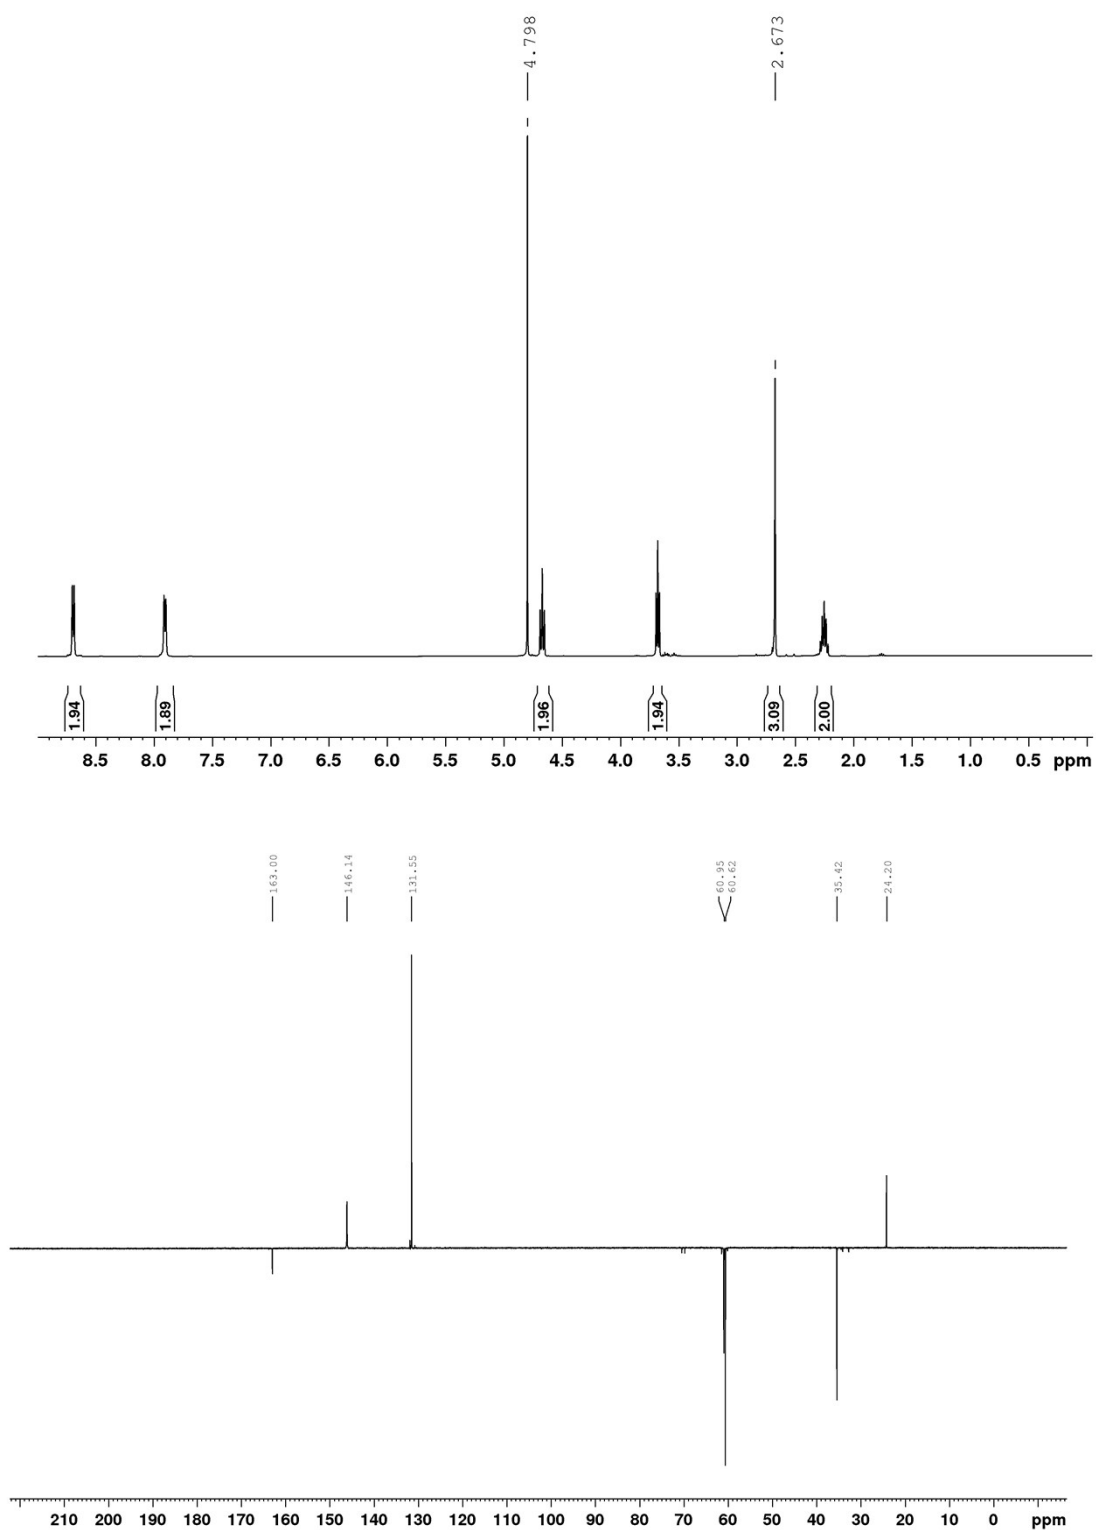

**Figure S16.** <sup>1</sup>H and <sup>13</sup>C NMR spectra for synthesized [OHC<sub>3</sub>-4mpyc][Cl]

<sup>1</sup>H NMR (D<sub>2</sub>O): 2.25 (*m*, 2H, CH<sub>2</sub>-2'), 2.67 (*s*, 3H, CH<sub>3</sub>), 3.68 (*t*, 2H, *J*<sub>2',3'</sub> = 6.1 Hz, CH<sub>2</sub>OH), 4.67 (*t*, 2H, *J*<sub>1',2'</sub> = 7.3 Hz, CH<sub>2</sub>-1'), 7.91 (*d*, 1H, *J* = 6.3 Hz, H-3 and H-5), 8.69 (*d*, 1H, *J* = 6.3 Hz, H-2 and H-6)

$^{13}\text{C}$  NMR ( $\text{D}_2\text{O}$ ): 24.20 ( $\text{CH}_3$ ), 35.42 ( $\text{CH}_2\text{-}2'$ ), 60.62 ( $\text{HOCH}_2$ ), 60.95 ( $\text{CH}_2\text{-}1'$ ), 131.55 (C3 and C-5), 146.14 (C-2 and C-6), 163.00 (C-4)

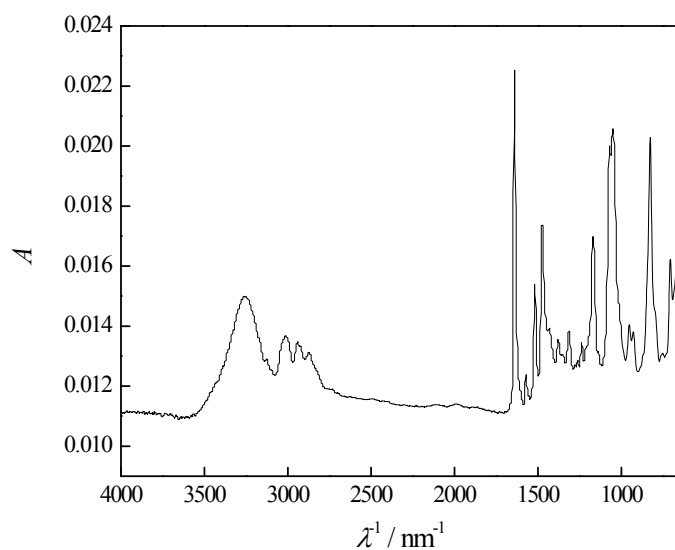

**Figure S17.** FTIR spectra of [OHC<sub>3</sub>-4mpyc][Cl]

3012 (CH sym. stretching); 2941 (sym. vibrations of CO-H); 1633 (OH bending); 1571 (aromatic C-C stretching); 1473 (rocking  $\text{CH}_3$ ); 1312 and 1238 ( $\text{C}_{\text{aromatic}}\text{-C}_{\text{alifatic}}$  or C- $\text{CH}_3$  stretching vibrations); 1171 and 1282 (wagging  $\text{CH}_2$  (hydroxypropile)); 1049 (skeletal vibrations of the ring); 827 (out-of-plane bending vibrations CH (ring)).

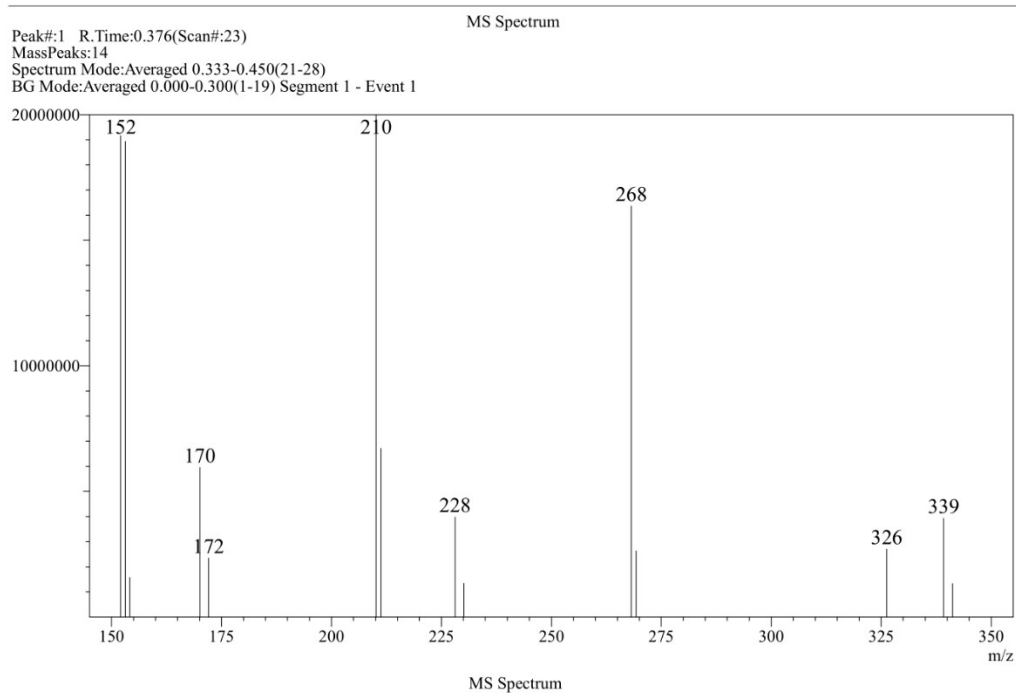

Peak#:1 R.Time:0.376(Scan#:23)  
 MassPeaks:14  
 Spectrum Mode:Averaged 0.333-0.450(21-28)  
 BG Mode:Averaged 0.000-0.300(1-19) Segment 1 - Event 1

| m/z    | Absolute Intensity | Relative Intensity |
|--------|--------------------|--------------------|
| 152.05 | 19165313           | 95.83              |
| 153.10 | 18933776           | 94.67              |
| 154.15 | 1579169            | 7.90               |
| 170.05 | 5961034            | 29.81              |
| 172.10 | 2346181            | 11.73              |
| 210.15 | 20000000           | 100.00             |
| 211.20 | 6717301            | 33.59              |

**Figure S18.** MS spectra of [OHC<sub>3</sub>-4mpyc][Cl]

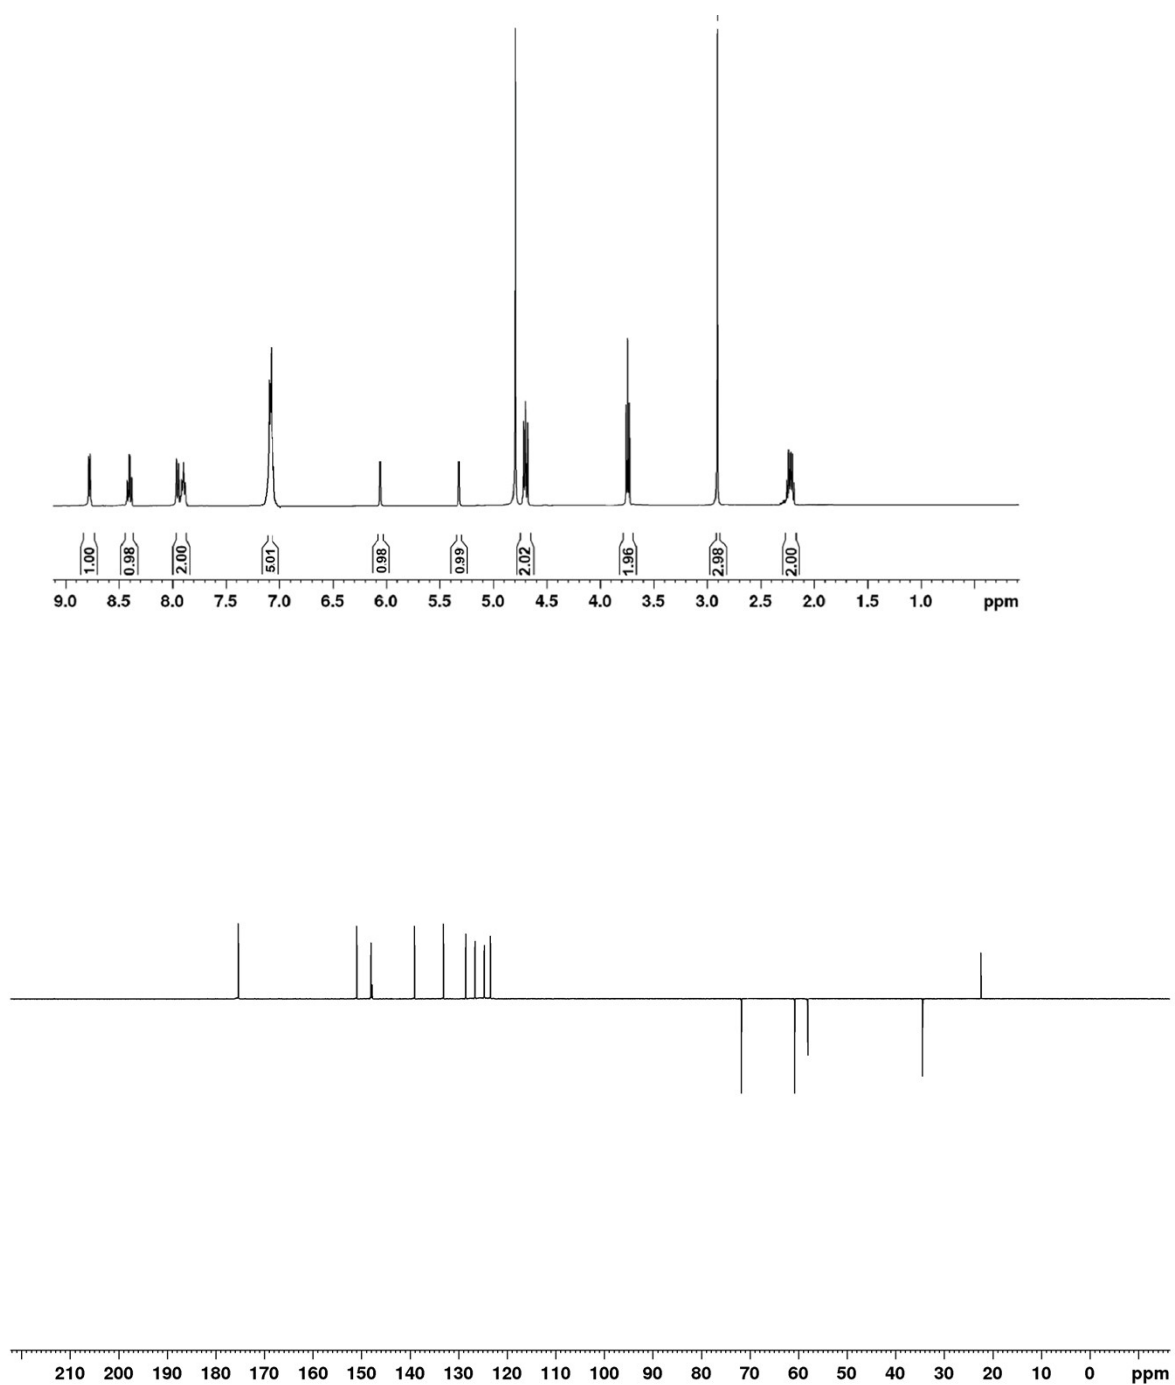

**Figure S19.** <sup>1</sup>H and <sup>13</sup>C NMR spectra for synthesized [OHC<sub>3</sub>-2mpyc][Cin]

<sup>1</sup>H NMR (D<sub>2</sub>O): 2.22 (*m*, 2H, CH<sub>2</sub>-2'), 2.94 (*s*, 3H, CH<sub>3</sub>), 3.78 (*t*, 2H, *J*<sub>2',3'</sub> = 6.0 Hz, CH<sub>2</sub>OH), 4.70 (*t*, 2H, *J*<sub>1',2'</sub> = 7.2 Hz, CH<sub>2</sub>-1'), 7.14, 7.21 and 7.26 (2xs, 5H, H-6, H-7, H-8, H-9, H-10); 7.96 (*dd*, 1H, *J*<sub>5',6'</sub> = 6.1 Hz, *J*<sub>5,6</sub> = 8.0 Hz, H-5), 8.44 (*d*, 1H, *J*<sub>4,5</sub> = 8.0 Hz, H-4), 8.92 (*d*, 1H, *J*<sub>5,6</sub> = 6.1 Hz, H-6)

<sup>13</sup>C NMR (D<sub>2</sub>O): 22.41 (CH<sub>3</sub>), 34.13 (CH<sub>2</sub>-2'), 59.42 (HOCH<sub>2</sub>), 61.77 (CH<sub>2</sub>-1'), 129.63 (C-5); 133.12 (C-3); 135.24 (C-6); 135.99 (C-7), 136.81 (C-8); 144.62 (C-6); 147.51 (C-2); 148.93 (C-4); 150.66 (C-9) and 179.01 (COO<sup>-</sup>)



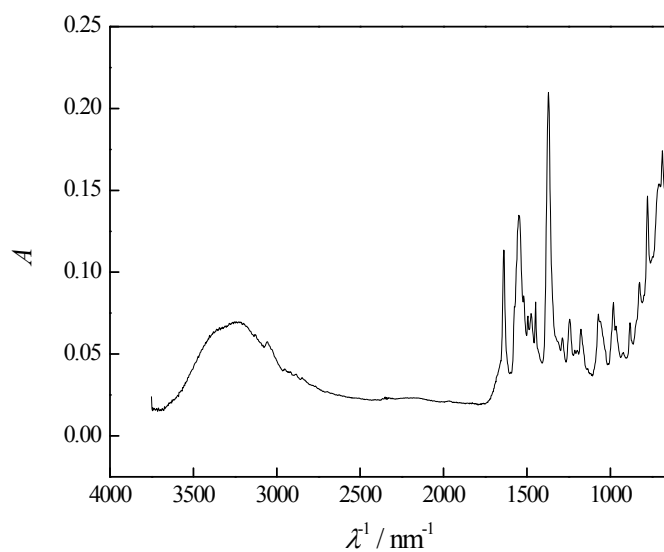

**Figure S20.** FTIR spectra of [OHC<sub>3</sub>-2mpic] [Cin]

3215 (stretching OH), 1635 (skeletal vibration of cinnamate ring); 1556 (C-C in plane bending, cinnamate anion); 1429 and 1365 (C-N stretching); 1173 and 1059 (C=O stretching); 981 (CH wagging); 881 (in plane bending CC); 775 (C-O wagging)

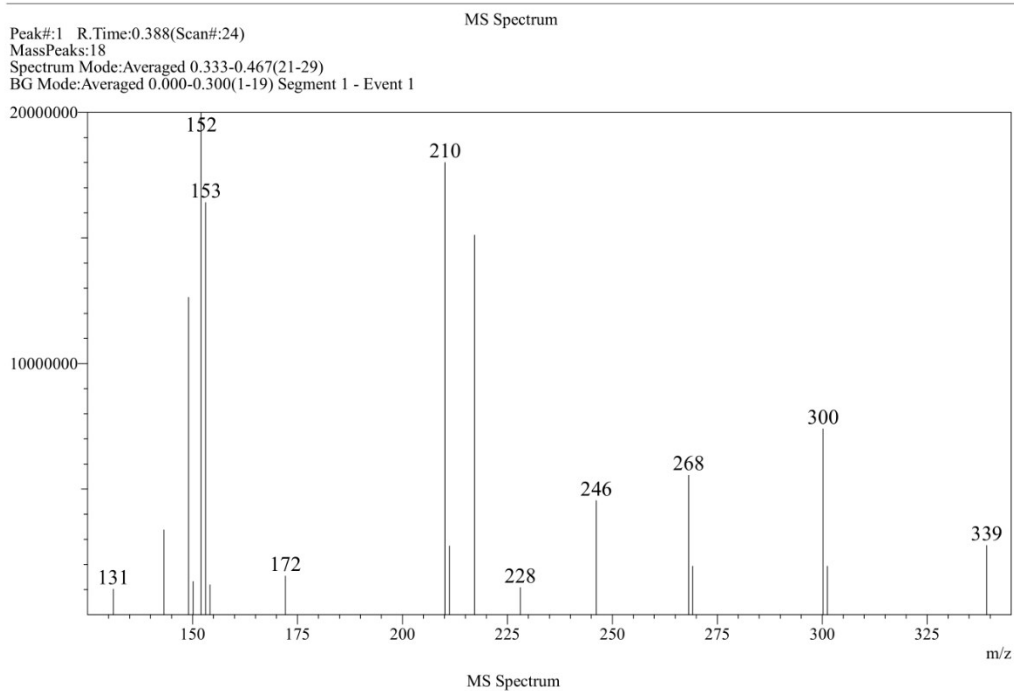

Peak#:1 R.Time:0.388(Scan#:24)  
 MassPeaks:18  
 Spectrum Mode:Averaged 0.333-0.467(21-29)  
 BG Mode:Averaged 0.000-0.300(1-19) Segment 1 - Event 1

| m/z    | Absolute Intensity | Relative Intensity |
|--------|--------------------|--------------------|
| 131.10 | 1019381            | 5.10               |
| 143.15 | 3379728            | 16.90              |
| 149.05 | 12634396           | 63.17              |
| 150.10 | 1327198            | 6.64               |
| 152.05 | 20000000           | 100.00             |
| 153.10 | 16408110           | 82.04              |
| 154.15 | 1188618            | 5.94               |
| 172.15 | 1540713            | 7.70               |
| 210.15 | 18007233           | 90.04              |

**Figure S21.** MS spectra of [OHC<sub>3</sub>-2mpyc][Cin]

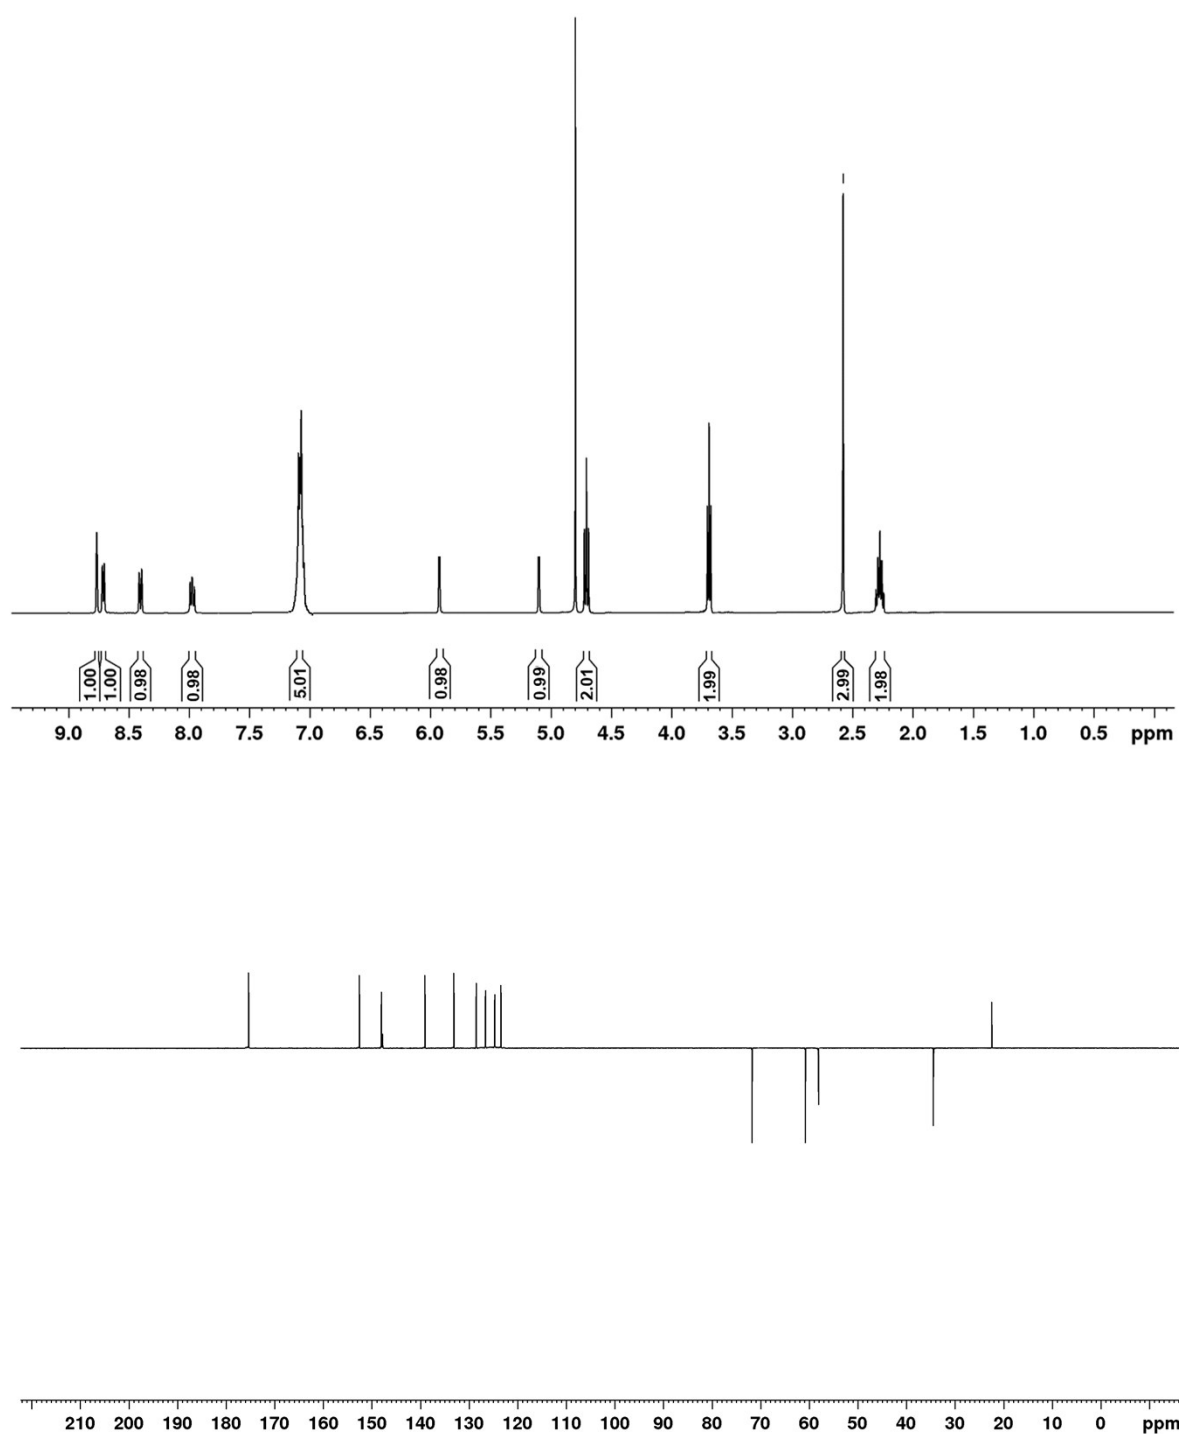

**Figure S22.** <sup>1</sup>H and <sup>13</sup>C NMR spectra for synthesized [OHC<sub>3</sub>-3mpyc][Cin]

<sup>1</sup>H NMR (D<sub>2</sub>O): 2.33 (*m*, 2H, CH<sub>2</sub>-2'), 2.63 (*s*, 3H, CH<sub>3</sub>), 3.70 (*t*, 2H, *J*<sub>2,3'</sub> = 6.0 Hz, CH<sub>2</sub>OH), 4.71 (*t*, 2H, *J*<sub>1',2'</sub> = 7.2 Hz, CH<sub>2</sub>-1'), 7.21, 7.26 and 7.32 (2xs, 5H, H-6, H-7, H-8, H-9, H-10); 7.98 (dd, 1H, *J*<sub>5',6'</sub> = 6.1 Hz, *J*<sub>5,6</sub> = 8.0 Hz H-5), 8.42 (*d*, 1H, *J*<sub>4,5</sub> = 8.0 Hz, H-4), 8.83 (*d*, 1H, *J*<sub>5,6</sub> = 6.1 Hz, H-6), 8.91 (*s*, 1H, H-2)

$^{13}\text{C}$  NMR ( $\text{D}_2\text{O}$ ): 21.63 ( $\text{CH}_3$ ), 35.78 ( $\text{CH}_2\text{-2}'$ ), 60.71 ( $\text{HOCH}_2$ ), 61.67 ( $\text{CH}_2\text{-1}'$ ), 131.35 (C-5), 135.11 (C-6); 135.62 (C-7), 136.24 (C-8); 144.84 (C-3), 147.40 (C-6), 148.82 (C-2), 149.51 (C-4); 150.23 (C-9) and 178.96 ( $\text{COO}^-$ )

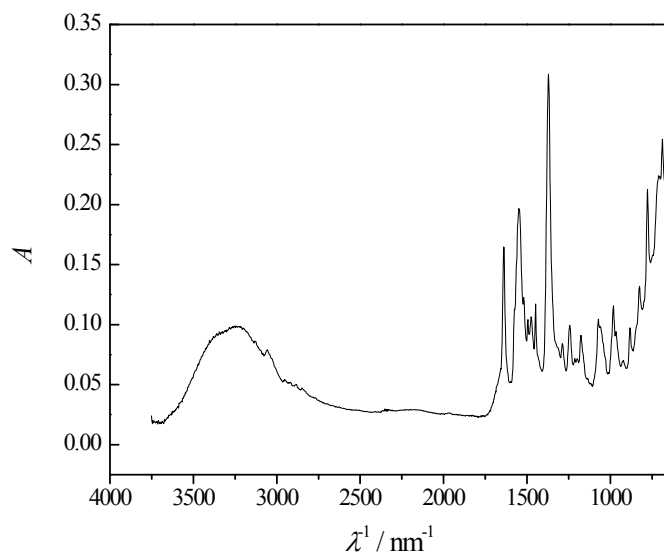

**Figure S23.** FTIR spectra of [OHC<sub>3</sub>-3mpic] [Cin]

3172 (stretching OH), 1619 (skeletal vibration of cinnamate ring); 1531 (C-C in plane bending, cinnamate anion); 1419 and 1355 (C-N stretching); 1173 and 1056 (C=O stretching); 978 (CH wagging); 876 (in plane bending CC); 732 (C-O wagging)

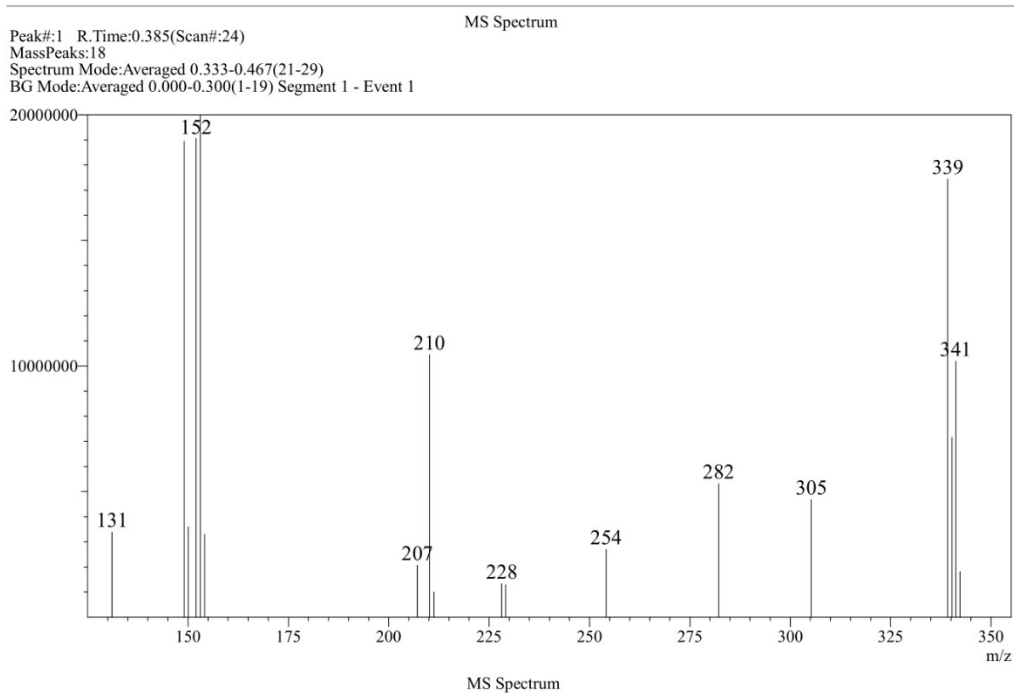

Peak#:1 R.Time:0.385(Scan#:24)  
 MassPeaks:18  
 Spectrum Mode:Averaged 0.333-0.467(21-29)  
 BG Mode:Averaged 0.000-0.300(1-19) Segment 1 - Event 1

| m/z    | Absolute Intensity | Relative Intensity |
|--------|--------------------|--------------------|
| 131.10 | 3389185            | 16.95              |
| 149.05 | 18952480           | 94.76              |
| 150.10 | 3603663            | 18.02              |
| 152.00 | 19065386           | 95.33              |
| 153.10 | 20000000           | 100.00             |
| 154.15 | 3301500            | 16.51              |
| 207.15 | 2067115            | 10.34              |
| 210.15 | 10451781           | 52.26              |
| 211.25 | 1005520            | 5.03               |

**Figure S24.** MS spectra of [OHC<sub>3</sub>-3mpyc][Cin]

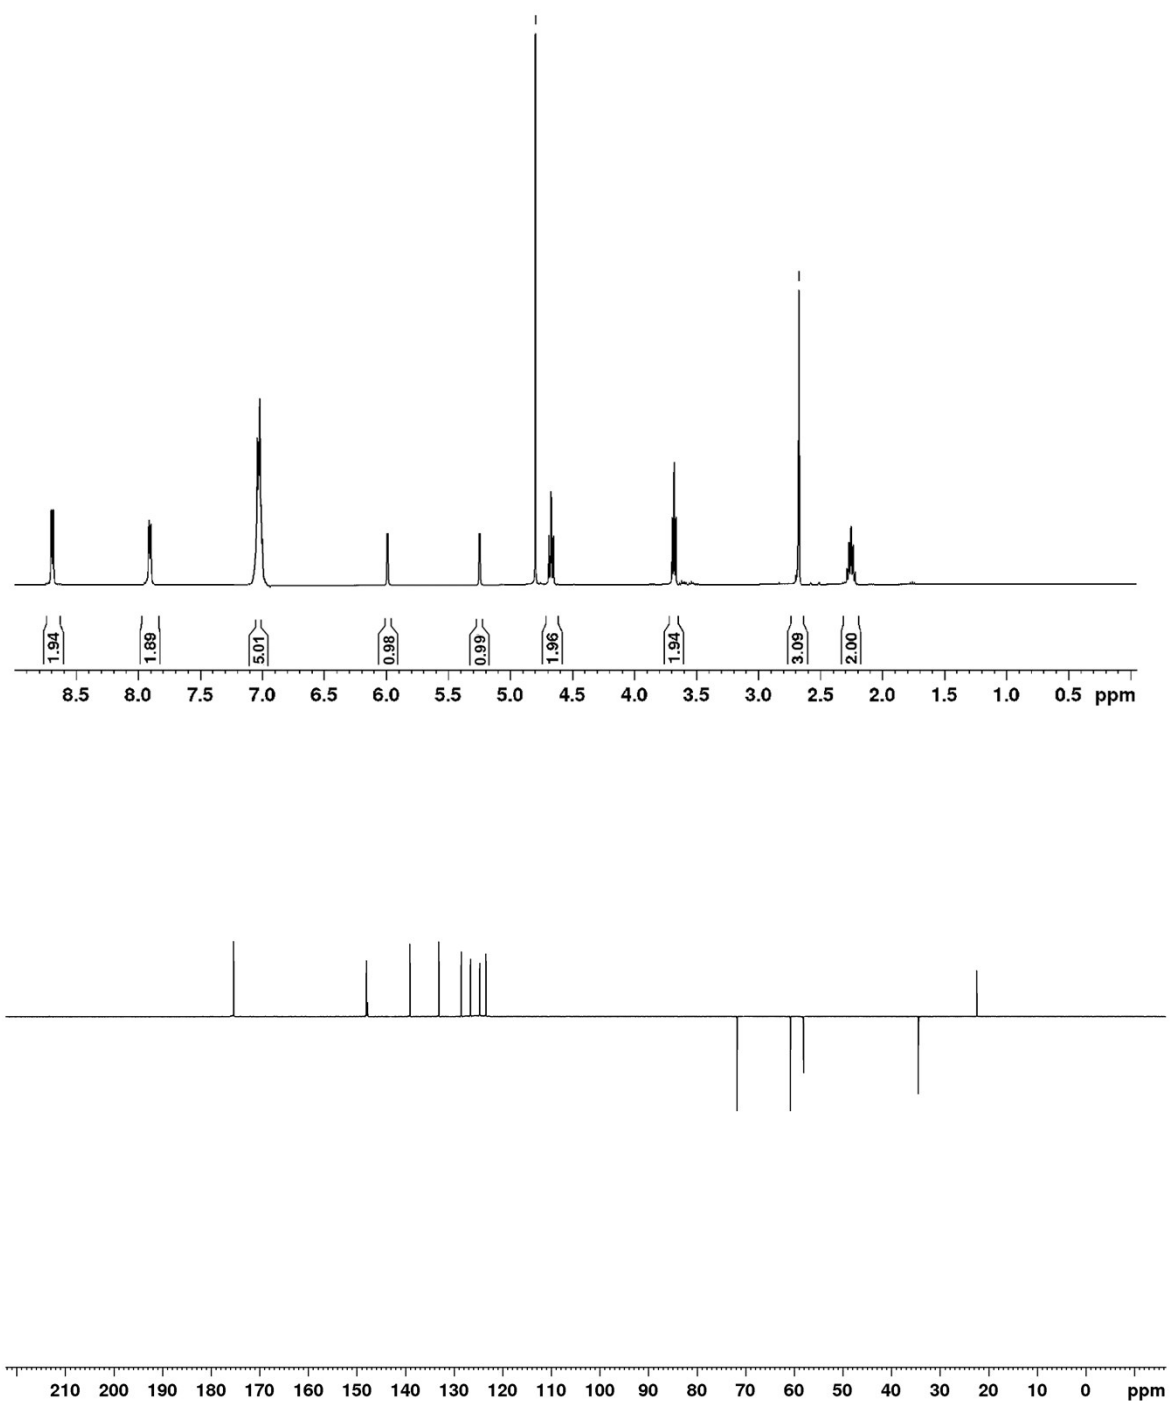

**Figure S25.**  $^1\text{H}$  and  $^{13}\text{C}$  NMR spectra for synthesized  $[\text{OHC}_3\text{-4mpyc}][\text{Cin}]$

$^1\text{H}$  NMR ( $\text{D}_2\text{O}$ ): 2.25 (*m*, 2H,  $\text{CH}_2\text{-2}'$ ), 2.67 (*s*, 3H,  $\text{CH}_3$ ), 3.68 (*t*, 2H,  $J_{2,3'} = 6.1$  Hz,  $\text{CH}_2\text{OH}$ ), 4.67 (*t*, 2H,  $J_{1,2'} = 7.3$  Hz,  $\text{CH}_2\text{-1}'$ ), 7.08, 7.14 and 7.21 (2xs, 5H, H-6, H-7, H-8, H-9, H-10); 7.91 (*d*, 1H,  $J = 6.3$  Hz, H-3 and H-5), 8.69 (*d*, 1H,  $J = 6.3$  Hz, H-2 and H-6)

$^{13}\text{C}$  NMR ( $\text{D}_2\text{O}$ ): 24.20 ( $\text{CH}_3$ ), 35.42 ( $\text{CH}_2\text{-2}'$ ), 60.62 ( $\text{HOCH}_2$ ), 60.95 ( $\text{CH}_2\text{-1}'$ ), 131.55 (C3 and C-5), 135.81 (C-6); 136.47 (C-7), 137.22 (C-8); 146.14 (C-2 and C-6), 163.00 (C-4); 165.21 (C-9) and 183.22 ( $\text{COO}^-$ )

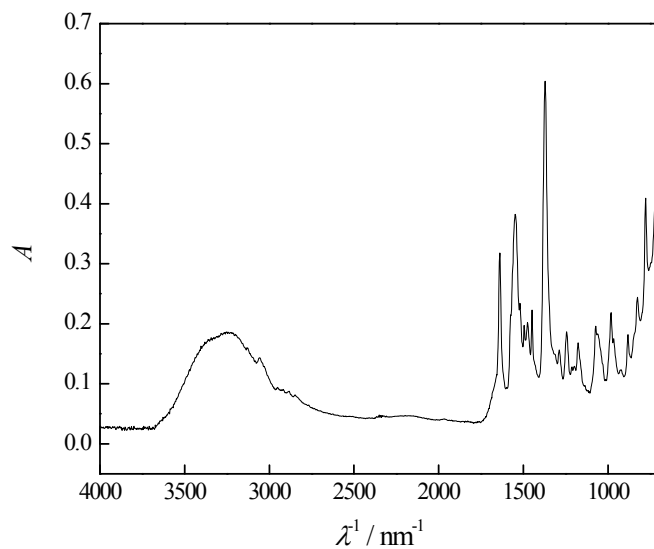

**Figure S26.** FTIR spectra of [OHC<sub>3</sub>-4mpyc] [Cin]

3151 (stretching OH), 1623 (skeletal vibration of cinnamate ring); 1518 (C-C in plane bending, cinnamate anion); 1422 and 1359 (C-N stretching); 1173 and 1056 (C=O stretching); 976 (CH wagging); 877 (in plane bending CC); 731 (C-O wagging)

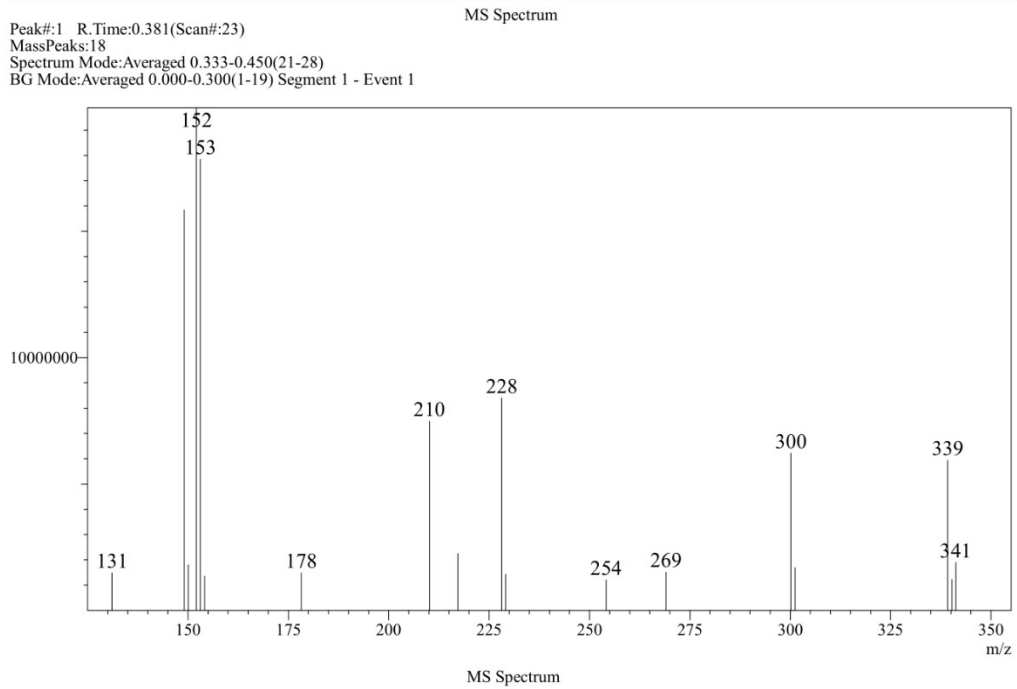

Peak#:1 R.Time:0.381(Scan#:23)  
 MassPeaks:18  
 Spectrum Mode:Averaged 0.333-0.450(21-28)  
 BG Mode:Averaged 0.000-0.300(1-19) Segment 1 - Event 1

| m/z    | Absolute Intensity | Relative Intensity |
|--------|--------------------|--------------------|
| 131.10 | 1489808            | 7.49               |
| 149.05 | 15849342           | 79.71              |
| 150.10 | 1803023            | 9.07               |
| 152.05 | 19883753           | 100.00             |
| 153.10 | 17852622           | 89.78              |
| 154.15 | 1360586            | 6.84               |
| 178.20 | 1485148            | 7.47               |
| 210.15 | 7491151            | 37.67              |
| 217.20 | 2255297            | 11.34              |

**Figure S27.** MS spectra of [OHC<sub>3</sub>-4mpyc][Cin]



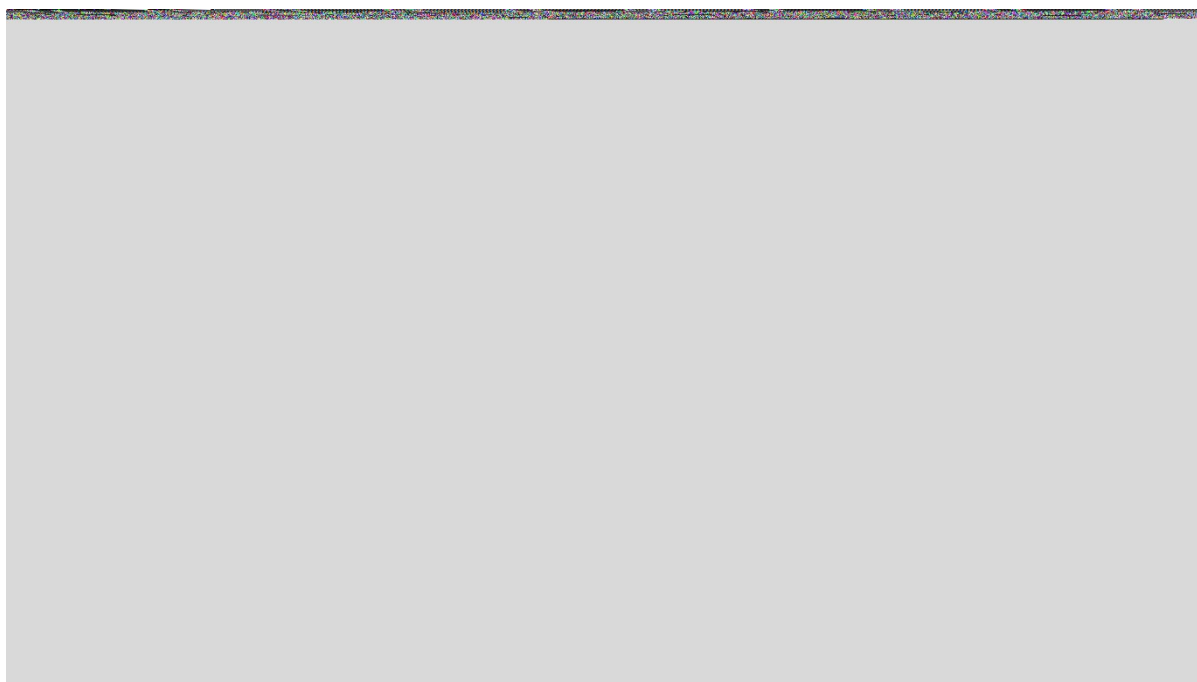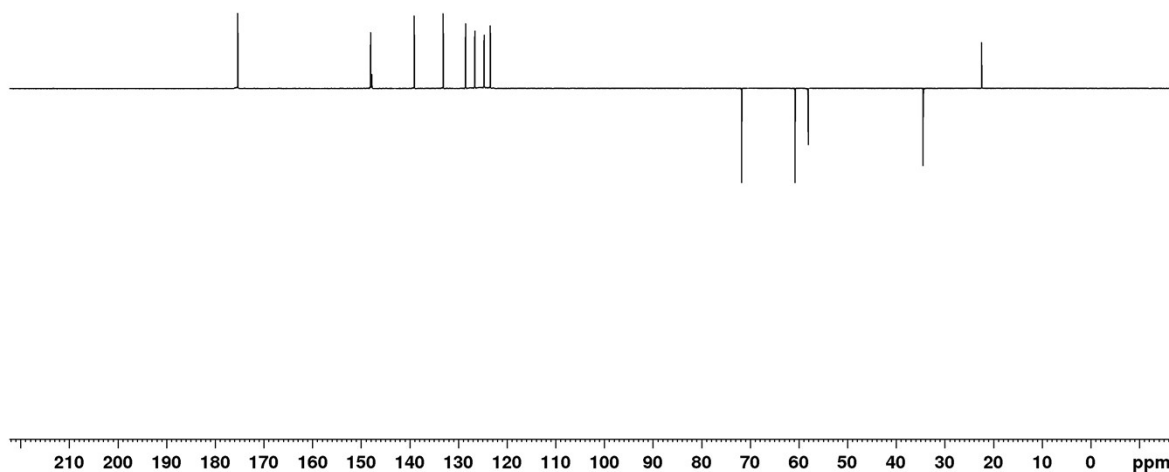

**Figure S28.**  $^1\text{H}$  and  $^{13}\text{C}$  NMR spectra for  $[\text{OHC}_3\text{-2mpyc}][\text{Man}]$

$^1\text{H}$  NMR ( $\text{D}_2\text{O}$ ): 2.18 (*m*, 2H,  $\text{CH}_2\text{-2}'$ ), 2.90 (*s*, 3H,  $\text{CH}_3$ ), 3.75 (*t*, 2H,  $J_{2',3'} = 6.0$  Hz,  $\text{CH}_2\text{OH}$ ), 4.70 (*t*, 2H,  $J_{1',2'} = 7.2$  Hz,  $\text{CH}_2\text{-1}'$ ), 5.13 (*C-OH*); 7.18, 7.22 and 7.26 (2xs, 5H, H-6, H-7, H-8, H-9, H-10); 7.96 (*dd*, 1H,  $J_{5',6'} = 6.1$  Hz,  $J_{5,6} = 8.0$  Hz H-5), 8.40 (*d*, 1H,  $J_{4,5} = 8.0$  Hz, H-4), 8.80 (*d*, 1H,  $J_{5,6} = 6.1$  Hz, H-6)

$^{13}\text{C}$  NMR ( $\text{D}_2\text{O}$ ): 22.41 ( $\text{CH}_3$ ), 34.13 ( $\text{CH}_2\text{-2}'$ ), 58.42 ( $\text{HOCH}_2$ ), 60.77 ( $\text{CH}_2\text{-1}'$ ), 77.63 (*C-OH*); 128.53 (*C-5*); 133.12 (*C-3*); 135.24 (*C-6*); 135.99 (*C-7*), 136.81 (*C-8*); 144.62 (*C-6*); 147.81 (*C-2*); 149.41 (*C-4*); 150.66 (*C-9*) and 179.22 ( $\text{COO}^-$ )

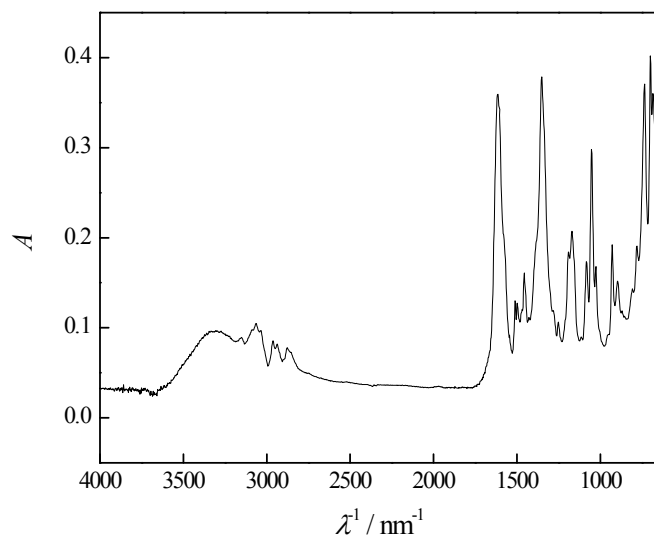

**Figure S29.** FTIR spectra of [OHC<sub>3</sub>-2mpic] [Man]

3268 (OH stretching), 3037 (CH sym. stretching), 2848 (sym. vibrations CO-H), 1605 (ring deformation mandelate), 1514 (C-C in plane bending, mandelate anion), 1485 (rocking CH<sub>3</sub>), 1452 and 1353 (C-N stretching), 1172 and 1053 (C=O stretching), 931 (CH wagging), 734 (C-O wagging)

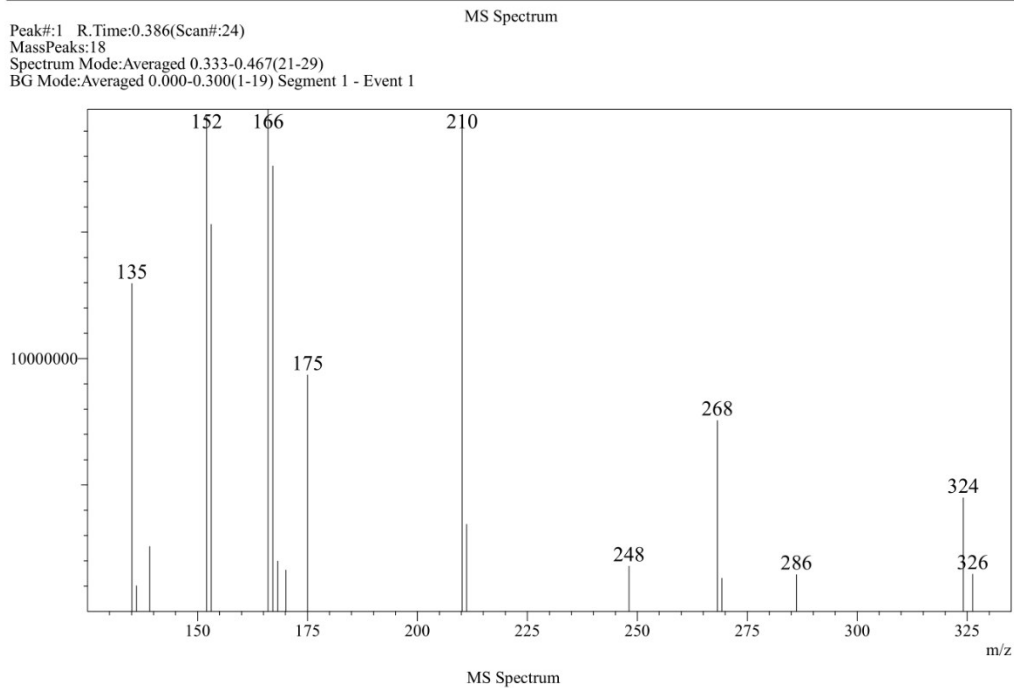

Peak#:1 R.Time:0.386(Scan#:24)  
 MassPeaks:18  
 Spectrum Mode:Averaged 0.333-0.467(21-29)  
 BG Mode:Averaged 0.000-0.300(1-19) Segment 1 - Event 1

| m/z    | Absolute Intensity | Relative Intensity |
|--------|--------------------|--------------------|
| 135.05 | 12974701           | 65.31              |
| 136.10 | 1015026            | 5.11               |
| 139.15 | 2570961            | 12.94              |
| 152.05 | 19558009           | 98.45              |
| 153.10 | 15313977           | 77.09              |
| 166.05 | 19865109           | 100.00             |
| 167.15 | 17626492           | 88.73              |
| 168.20 | 1994068            | 10.04              |
| 170.10 | 1632888            | 8.22               |

**Figure S30.** MS spectra of [OHC<sub>3</sub>-2mpyc][Man]

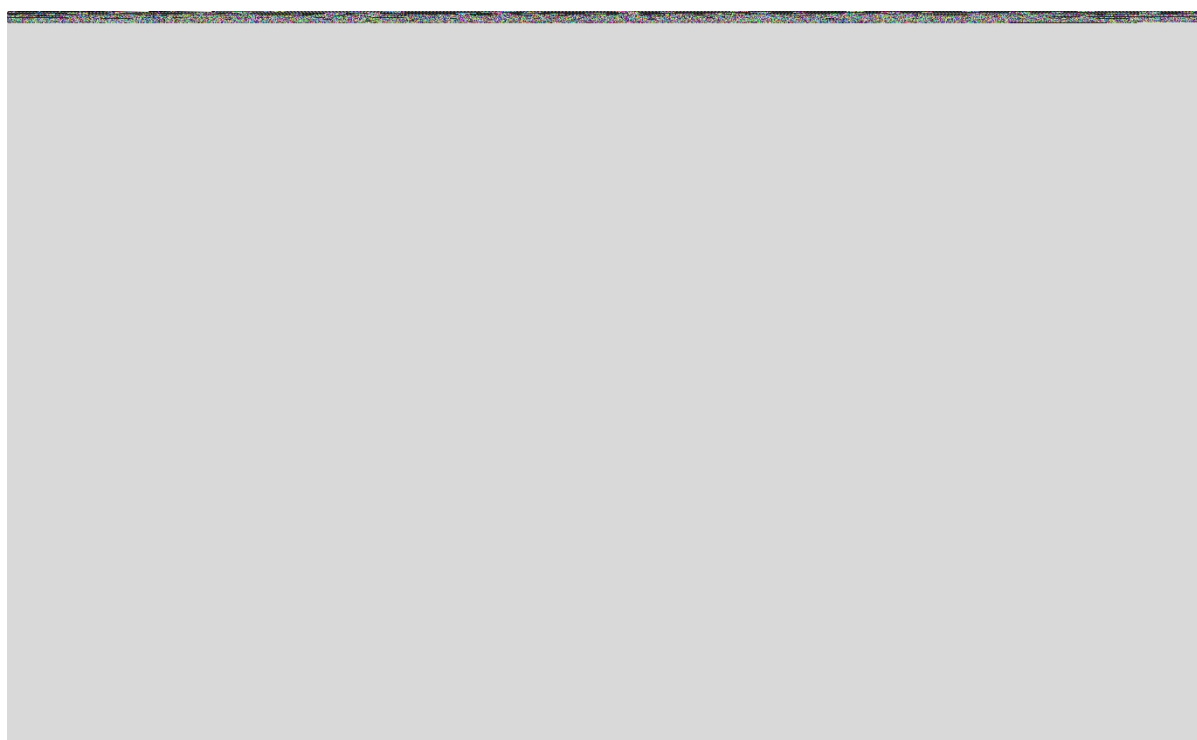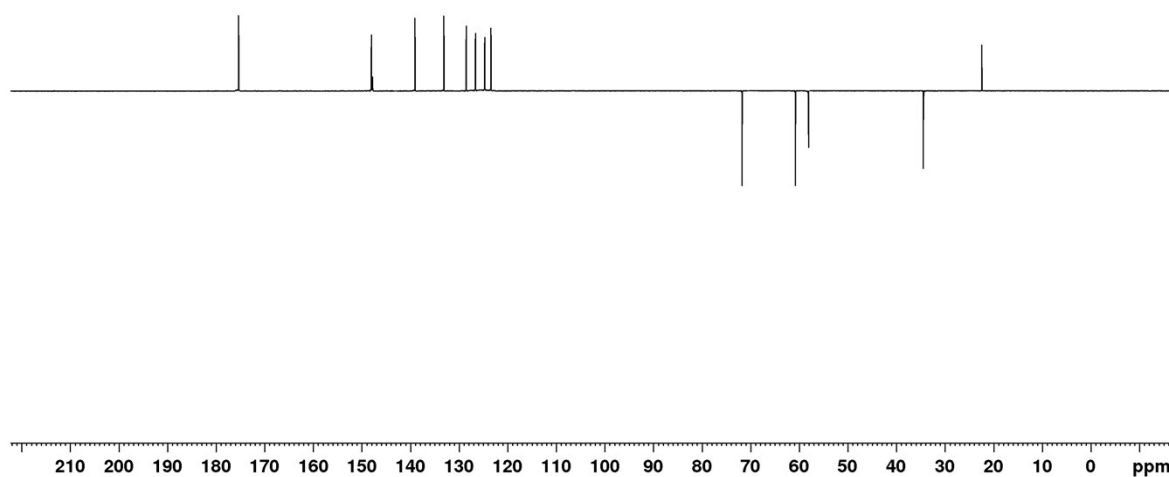

**Figure S31.**  $^1\text{H}$  and  $^{13}\text{C}$  NMR spectra for  $[\text{OHC}_3\text{-3mpyc}][\text{Man}]$

$^1\text{H}$  NMR ( $\text{D}_2\text{O}$ ): 2.27 (*m*, 2H,  $\text{CH}_2\text{-2}'$ ), 2.58 (*s*, 3H,  $\text{CH}_3$ ), 3.70 (*t*, 2H,  $J_{2',3'} = 6.0$  Hz,  $\text{CH}_2\text{OH}$ ), 4.71 (*t*, 2H,  $J_{1',2'} = 7.2$  Hz,  $\text{CH}_2\text{-1}'$ ), 5.23 (C-OH); 7.21, 7.26 and 7.32 (2xs, 5H, H-6, H-7, H-8, H-9, H-10); 7.98 (dd, 1H,  $J_{5',6'} = 6.1$  Hz,  $J_{5,6} = 8.0$  Hz H-5), 8.40 (*d*, 1H,  $J_{4,5} = 8.0$  Hz, H-4), 8.71 (*d*, 1H,  $J_{5,6} = 6.1$  Hz, H-6), 8.77 (*s*, 1H, H-2)

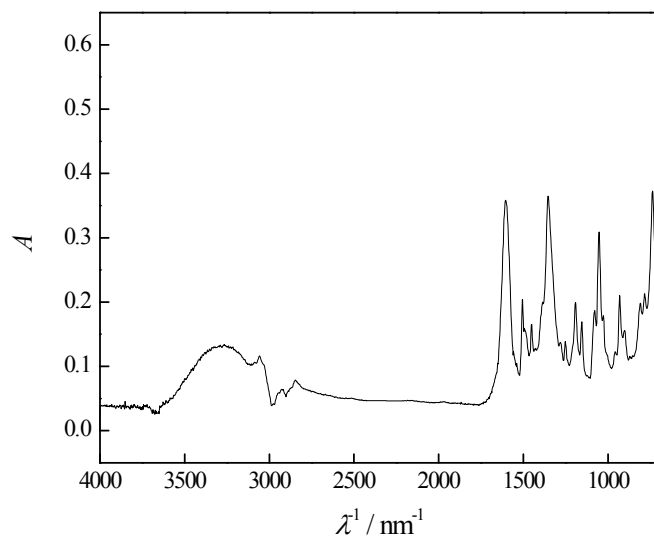

**Figure S32.** FTIR spectra of  $[\text{OHC}_3\text{-3mpyc}][\text{Man}]$

3266 (OH stretching), 3037 (CH sym. stretching), 2846 (sym. vibrations of CO-H), 1604 (ring deformation mandelate), 1505 (C-C in plane bending, mandelate anion), 1353 (C-N stretching), 1181 and 1052 (C=O stretching), 930 (CH wagging), 736 (C-O wagging)

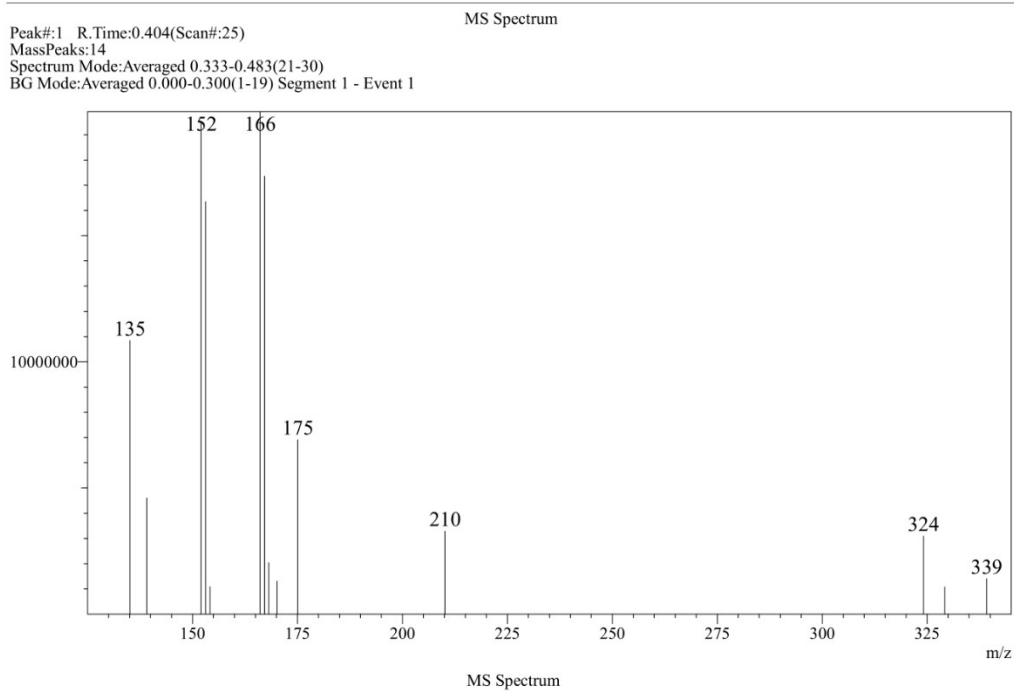

Peak#:1 R.Time:0.404(Scan#:25)  
 MassPeaks:14  
 Spectrum Mode:Averaged 0.333-0.483(21-30)  
 BG Mode:Averaged 0.000-0.300(1-19) Segment 1 - Event 1

| m/z    | Absolute Intensity | Relative Intensity |
|--------|--------------------|--------------------|
| 135.05 | 10844547           | 54.45              |
| 139.10 | 4609216            | 23.14              |
| 152.05 | 19520275           | 98.01              |
| 153.10 | 16347576           | 82.08              |
| 154.15 | 1090344            | 5.47               |
| 166.05 | 19916188           | 100.00             |
| 167.15 | 17361316           | 87.17              |

**Figure S33.** MS spectra of [OHC<sub>3</sub>-3mpyc][Man]

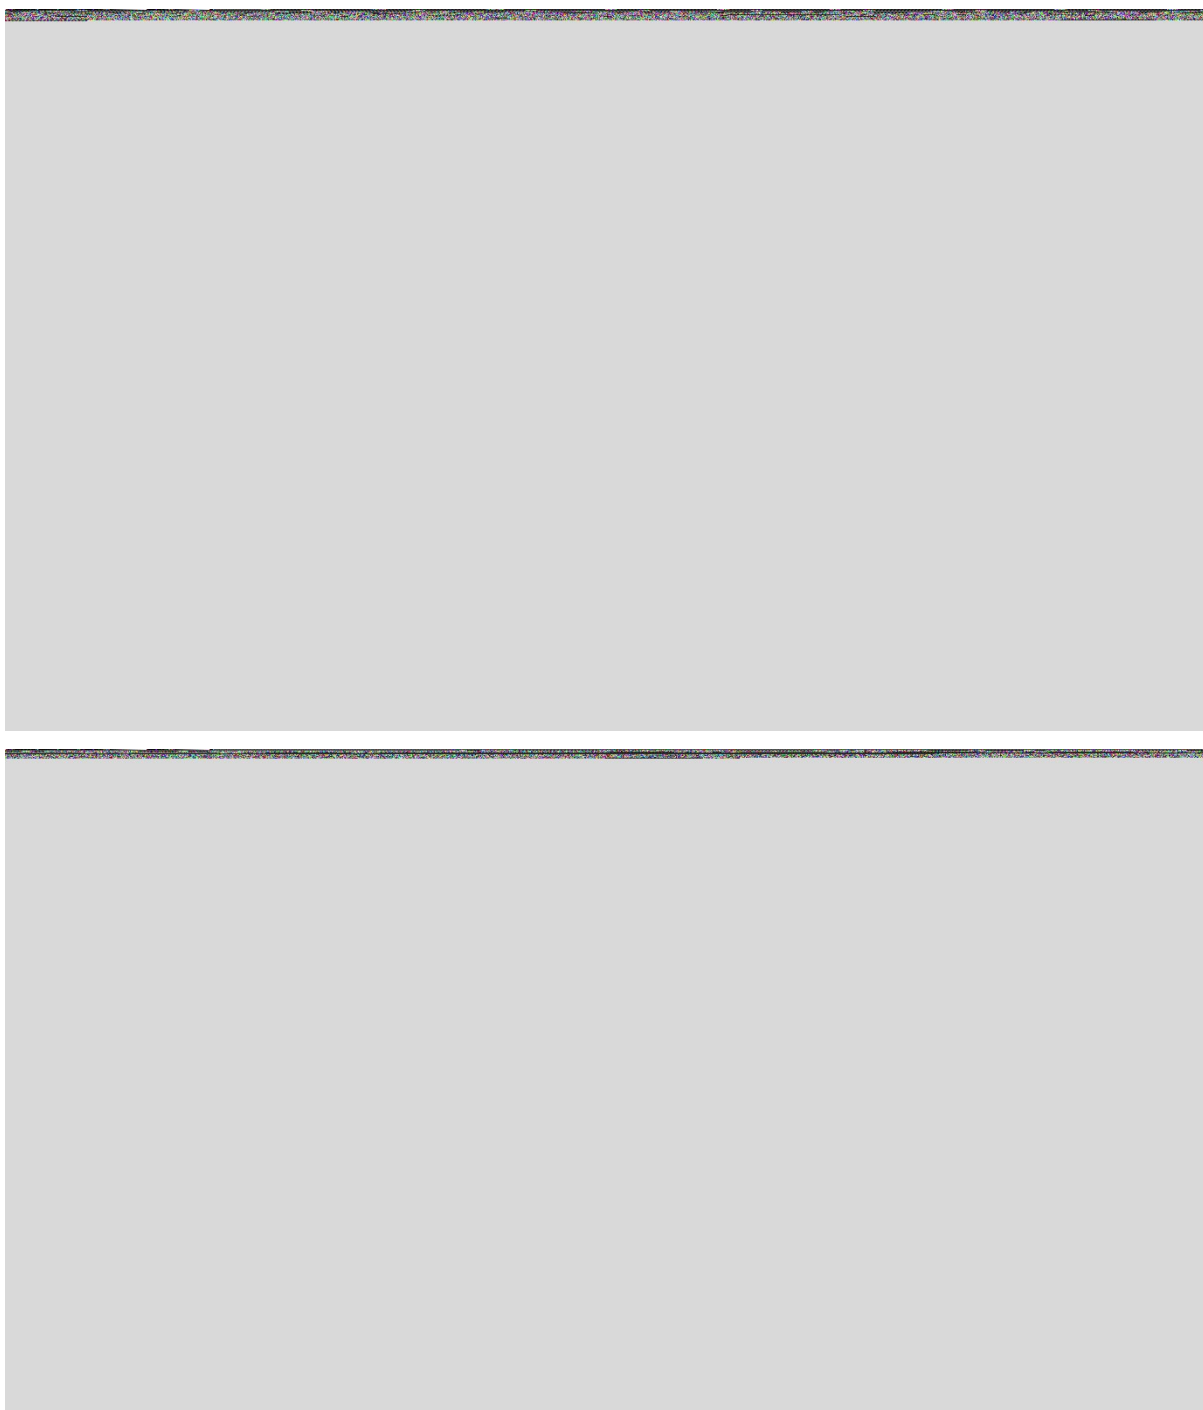

**Figure S34.**  $^1\text{H}$  and  $^{13}\text{C}$  NMR spectra for [OHC<sub>3</sub>-4mpyc][Man]

$^1\text{H}$  NMR ( $\text{D}_2\text{O}$ ): 2.25 (*m*, 2H,  $\text{CH}_2\text{-2}'$ ), 2.67 (*s*, 3H,  $\text{CH}_3$ ), 3.68 (*t*, 2H,  $J_{2',3'} = 6.1$  Hz,  $\text{CH}_2\text{OH}$ ), 4.67 (*t*, 2H,  $J_{1',2'} = 7.3$  Hz,  $\text{CH}_2\text{-1}'$ ), 5.11 (C-OH); 7.08, 7.14 and 7.21 (2xs, 5H, H-6, H-7, H-8, H-9, H-10); 7.91 (*d*, 1H,  $J = 6.3$  Hz, H-3 and H-5), 8.69 (*d*, 1H,  $J = 6.3$  Hz, H-2 and H-6)

$^{13}\text{C}$  NMR ( $\text{D}_2\text{O}$ ): 24.20 ( $\text{CH}_3$ ), 35.42 ( $\text{CH}_2\text{-2}'$ ), 60.62 ( $\text{HOCH}_2$ ), 60.95 ( $\text{CH}_2\text{-1}'$ ), 76.91 (C-OH); 131.55 (C3 and C-5), 135.81 (C-6); 136.47 (C-7), 137.22 (C-8); 146.14 (C-2 and C-6), 163.00 (C-4); 165.21 (C-9) and 183.22 ( $\text{COO}^-$ )

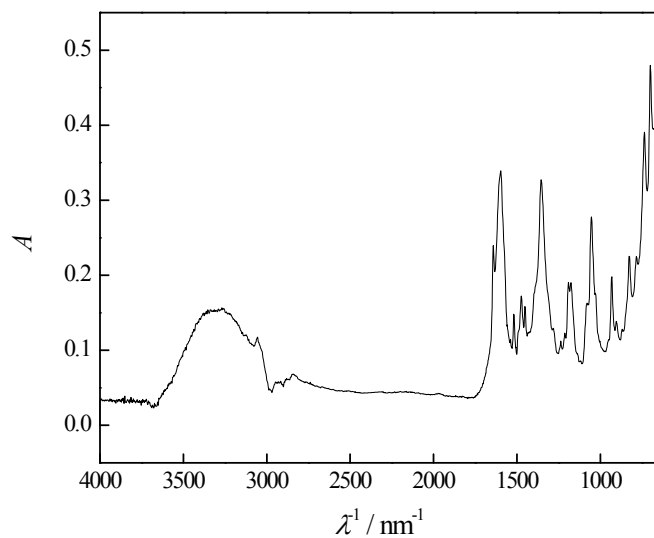

**Figure S35.** FTIR spectra of [OHC<sub>3</sub>-4mpic][Man]

3268 (OH stretching), 2840 (sym. vibrations of CO-H), 1597 (aromatic C-C stretching), 1518 (C-C in plane bending, mandelate anion), 1473 and 1354 (C-N stretching), 1191 and 1053 (C-O stretching), 932 (CH wagging), 826 (out of plane bending vibrations CH (ring)), 736 (C-O wagging)



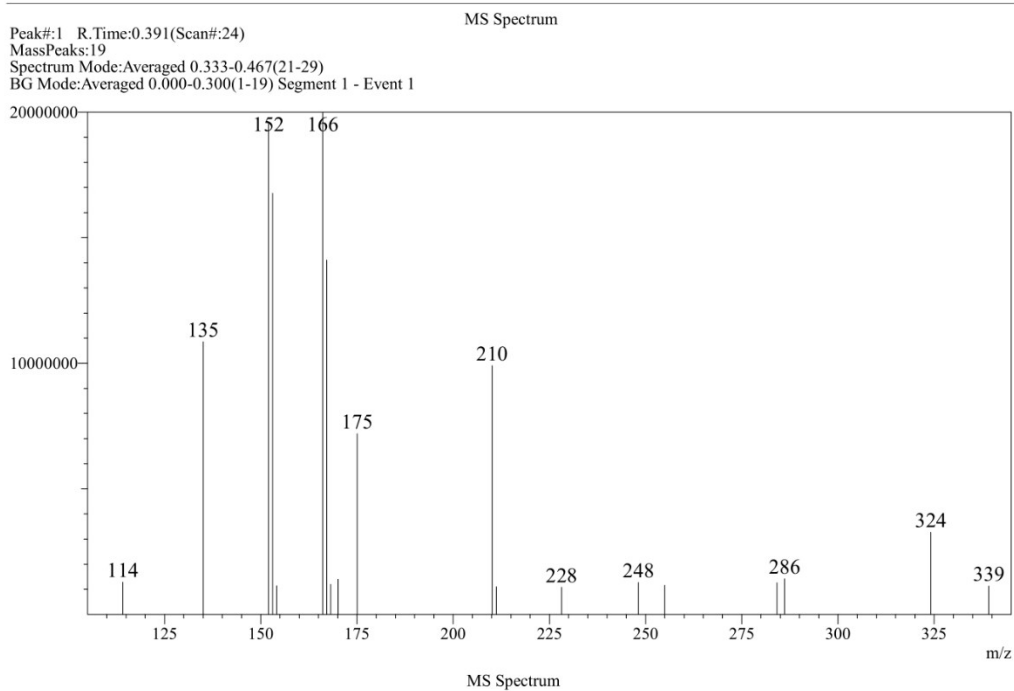

Peak#:1 R.Time:0.391(Scan#:24)  
 MassPeaks:19  
 Spectrum Mode:Averaged 0.333-0.467(21-29)  
 BG Mode:Averaged 0.000-0.300(1-19) Segment 1 - Event 1

| m/z    | Absolute Intensity | Relative Intensity |
|--------|--------------------|--------------------|
| 114.15 | 1283046            | 6.42               |
| 135.05 | 10859585           | 54.30              |
| 152.05 | 19536883           | 97.68              |
| 153.10 | 16768706           | 83.84              |
| 154.15 | 1145985            | 5.73               |
| 166.10 | 20000000           | 100.00             |
| 167.15 | 14111965           | 70.56              |
| 168.20 | 1208145            | 6.04               |
| 170.10 | 1406498            | 7.03               |
| 175.05 | 7199892            | 36.00              |

**Figure S36.** MS spectra of [OHC<sub>3</sub>-4mpyc][Man]

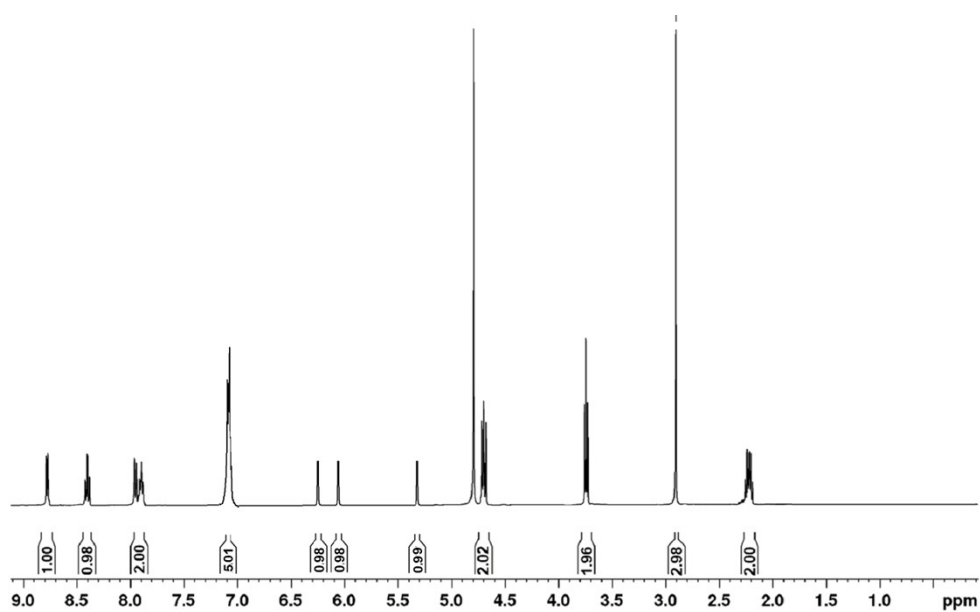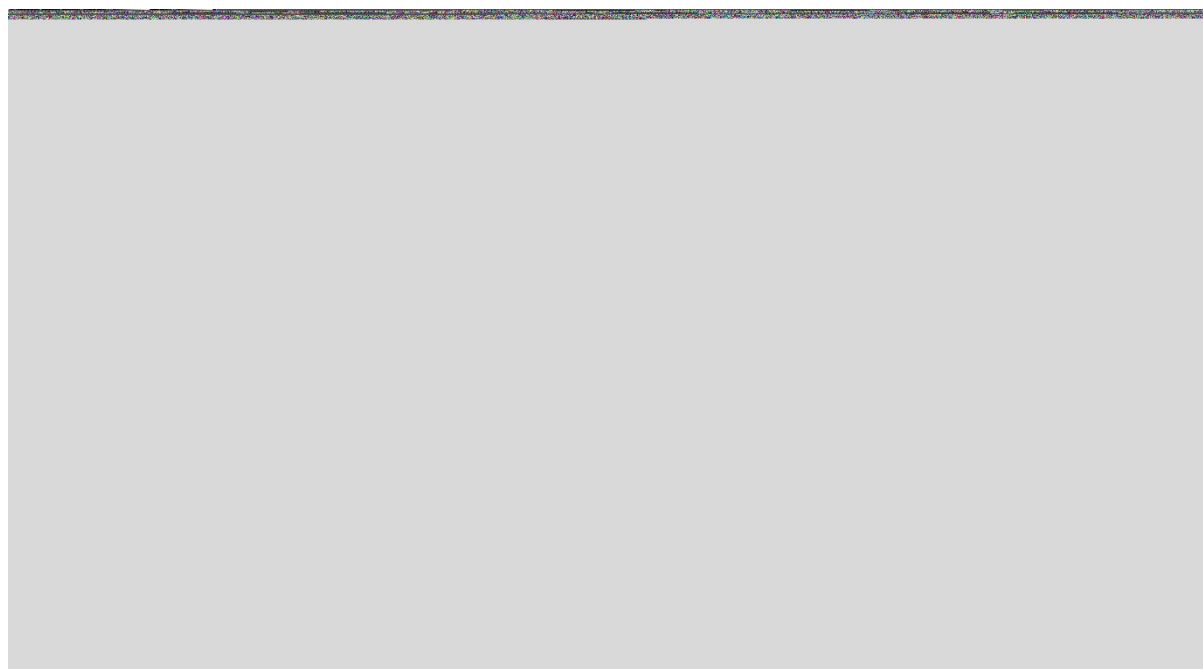

**Figure S37.**  $^1\text{H}$  and  $^{13}\text{C}$  NMR spectra for  $[\text{OHC}_3\text{-2mpyc}][\text{Caff}]$

$^1\text{H}$  NMR ( $\text{D}_2\text{O}$ ): 2.24 (*m*, 2H,  $\text{CH}_2\text{-2}'$ ), 2.94 (*s*, 3H,  $\text{CH}_3$ ), 3.81 (*t*, 2H,  $J_{2',3'} = 6.0$  Hz,  $\text{CH}_2\text{OH}$ ), 4.70 (*t*, 2H,  $J_{1,2'} = 7.2$  Hz,  $\text{CH}_2\text{-1}'$ ), 5.29 (*s*, 2H, C-OH); 7.19, 7.25 and 7.31 (2xs, 5H, H-6, H-7, H-8, H-9, H-10); 8.21 (*dd*, 1H,  $J_{5',6'} = 6.1$  Hz,  $J_{5,6} = 8.0$  Hz H-5), 8.59 (*d*, 1H,  $J_{4,5} = 8.0$  Hz, H-4), 8.92 (*d*, 1H,  $J_{5,6} = 6.1$  Hz, H-6)

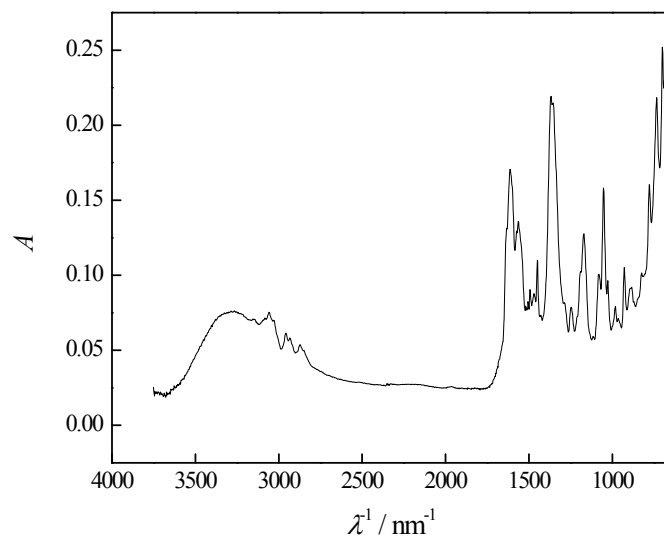

**Figure S38.** FTIR spectra of [OHC<sub>3</sub>-2mpyc][Caff]

3211 (stretching OH), 1469 (skeletal vibration of caffeate ring), 1404 and 1319 (C-N stretching), 1222 and 1196 (stretching OH group); 1141 and 1069 (C-O stretching); 966 (CH wagging); 707 (C-O wagging)

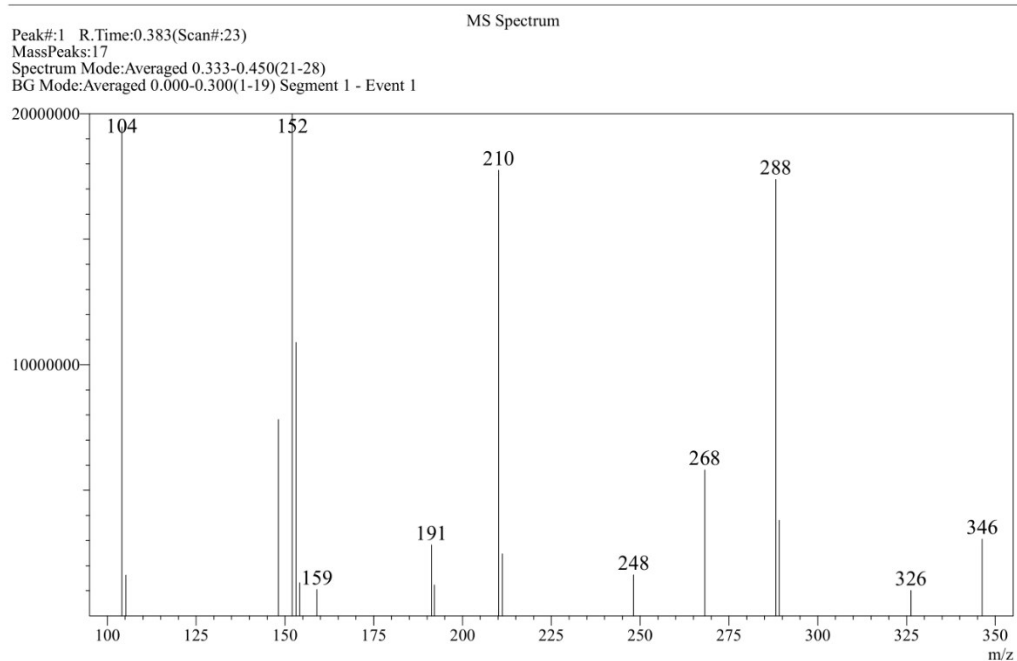

Peak#:1 R.Time:0.383(Scan#:23)  
 MassPeaks:17  
 Spectrum Mode:Averaged 0.333-0.450(21-28)  
 BG Mode:Averaged 0.000-0.300(1-19) Segment 1 - Event 1

| m/z    | Absolute Intensity | Relative Intensity |
|--------|--------------------|--------------------|
| 104.10 | 19464599           | 97.32              |
| 105.20 | 1627402            | 8.14               |
| 148.15 | 7820362            | 39.10              |
| 152.05 | 20000000           | 100.00             |
| 153.10 | 10890251           | 54.45              |
| 154.15 | 1326844            | 6.63               |
| 159.00 | 1049371            | 5.25               |
| 191.20 | 2832666            | 14.16              |
| 192.05 | 1235103            | 6.18               |

**Figure S39.** MS spectra of [OHC<sub>3</sub>-2mpyc][Caff]

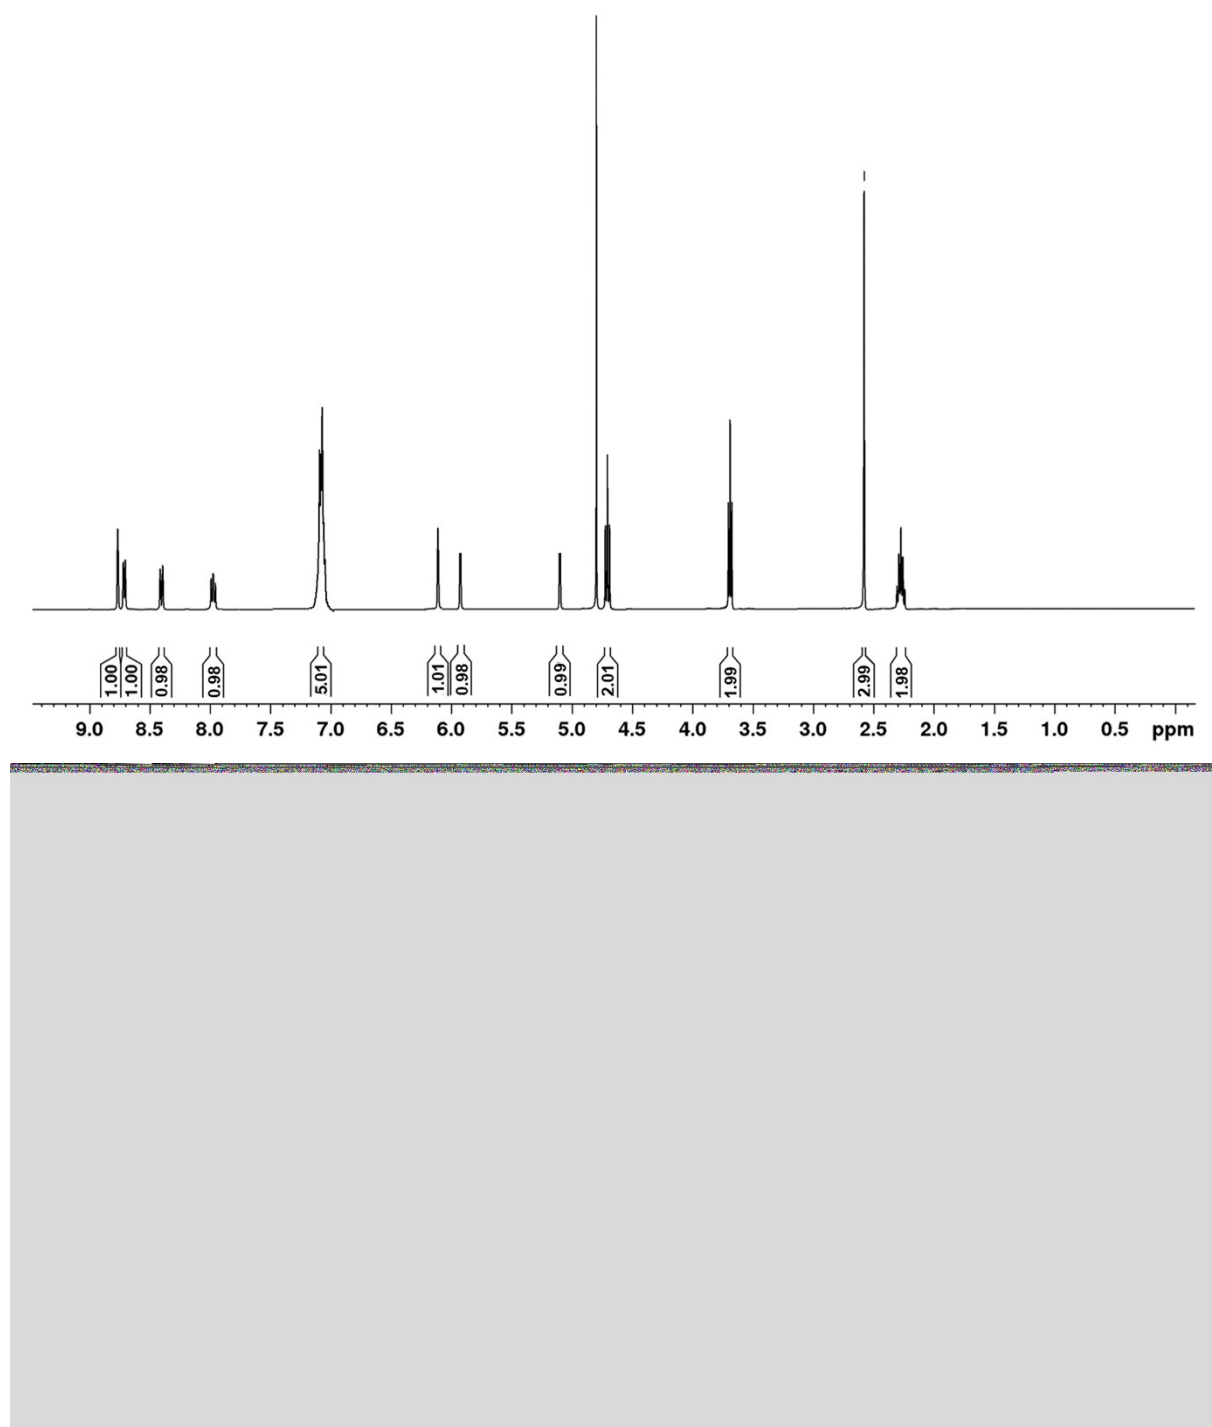

**Figure S40.** <sup>1</sup>H and <sup>13</sup>C NMR spectra for [OHC<sub>3</sub>-3mpyc][Caff]

<sup>1</sup>H NMR (D<sub>2</sub>O): 2.28 (*m*, 2H, CH<sub>2</sub>-2'), 2.62 (*s*, 3H, CH<sub>3</sub>), 3.74 (*t*, 2H, *J*<sub>2',3'</sub> = 6.0 Hz, CH<sub>2</sub>OH), 4.71 (*t*, 2H, *J*<sub>1',2'</sub> = 7.2 Hz, CH<sub>2</sub>-1'), 5.49 (*d*, 2H, C-OH); 7.25, 7.29 and 7.32 (2xs, 5H, H-6, H-7, H-8, H-9, H-10); 8.03 (*dd*, 1H, *J*<sub>5',6'</sub> = 6.1 Hz, *J*<sub>5,6</sub> = 8.0 Hz H-5), 8.49 (*d*, 1H, *J*<sub>4,5</sub> = 8.0 Hz, H-4), 8.71 (*d*, 1H, *J*<sub>5,6</sub> = 6.1 Hz, H-6), 8.82 (*s*, 1H, H-2)

<sup>13</sup>C NMR (D<sub>2</sub>O): 20.54 (CH<sub>3</sub>), 35.51 (CH<sub>2</sub>-2'), 60.84 (HOCH<sub>2</sub>), 61.73 (CH<sub>2</sub>-1'), 76.99 (C-OH); 130.35 (C-5), 135.94 (C-6); 136.62 (C-7), 137.24 (C-8); 143.96 (C-3), 144.51 (C-6), 146.82 (C-2), 149.01 (C-4); 153.23 (C-9) and 179.22 (COO<sup>-</sup>)

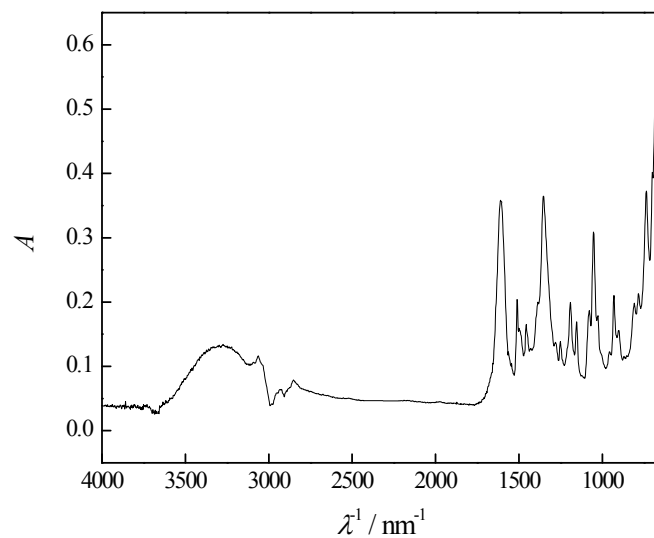

**Figure S41.** FTIR spectra of  $[\text{OHC}_3\text{-3mpyc}][\text{Caff}]$

3202 (stretching OH), 1461 (skeletal vibration of caffeate ring), 1402 and 1322 (C-N stretching), 1201 and 1176 (stretching OH group); 1133 and 1052 (C-O stretching); 969 (CH wagging); 712 (C-O wagging)

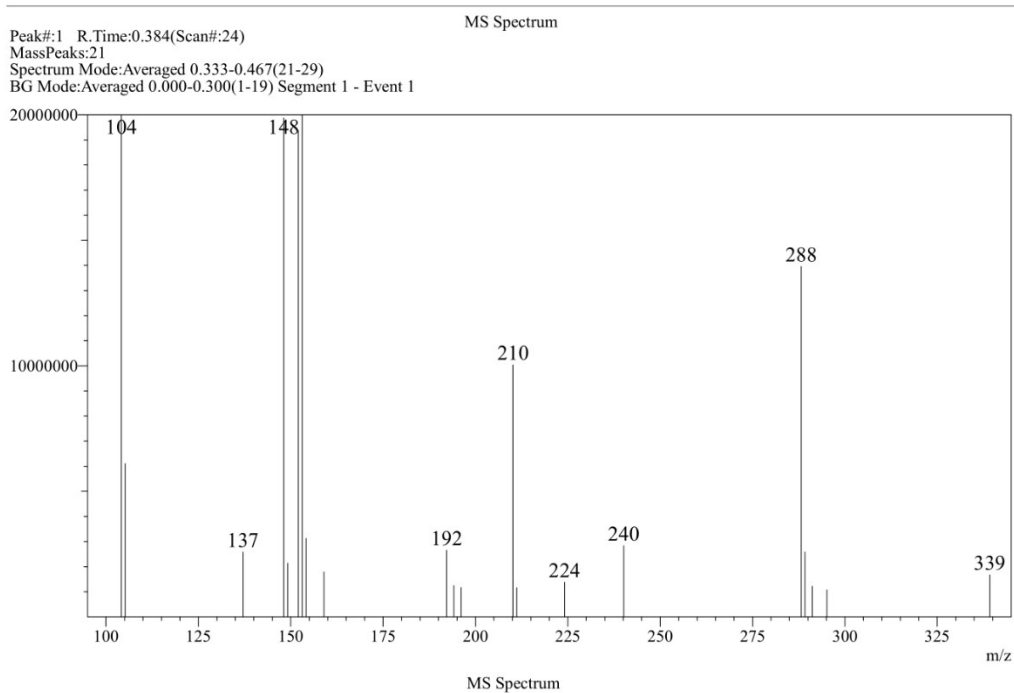

Peak#:1 R.Time:0.384(Scan#:24)  
 MassPeaks:21  
 Spectrum Mode:Averaged 0.333-0.467(21-29)  
 BG Mode:Averaged 0.000-0.300(1-19) Segment 1 - Event 1

| m/z    | Absolute Intensity | Relative Intensity |
|--------|--------------------|--------------------|
| 104.10 | 20000000           | 100.00             |
| 105.15 | 6103809            | 30.52              |
| 137.05 | 2589522            | 12.95              |
| 148.10 | 19879035           | 99.40              |
| 149.20 | 2150284            | 10.75              |
| 152.05 | 19374720           | 96.87              |
| 153.10 | 20000000           | 100.00             |
| 154.15 | 3125046            | 15.63              |
| 159.00 | 1792430            | 8.96               |
| 192.15 | 2659051            | 13.30              |

**Figure S42.** MS spectra of [OHC<sub>3</sub>-3mpyc][Caff]

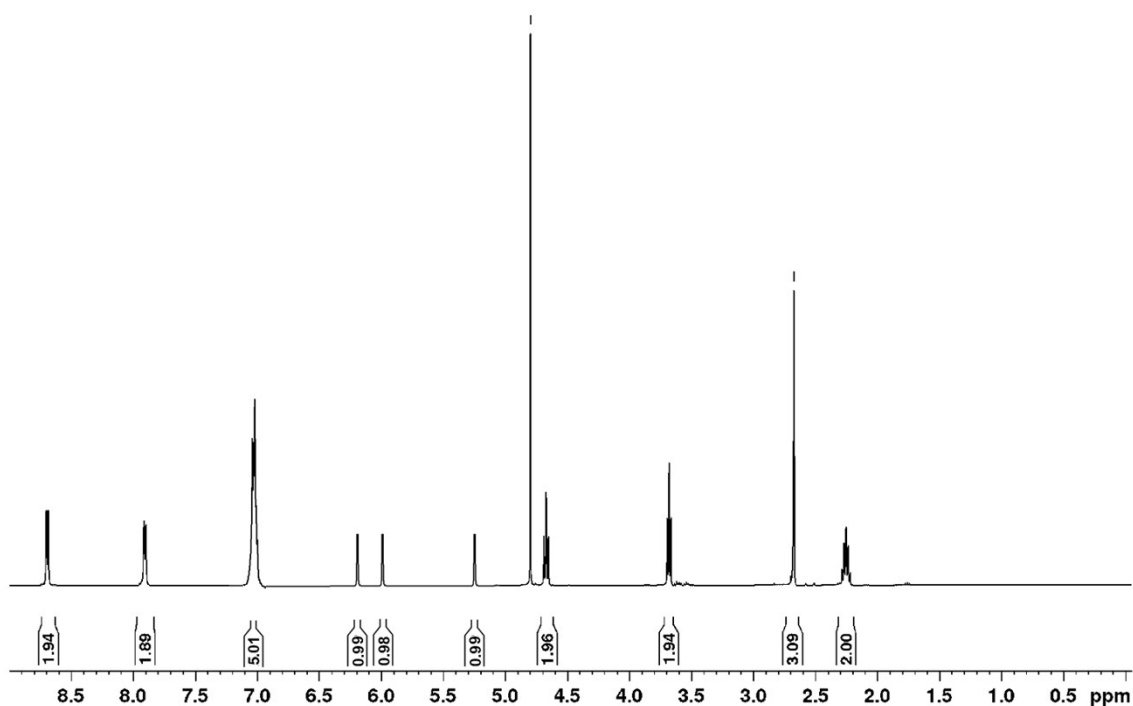

**Figure S43.**  $^1\text{H}$  and  $^{13}\text{C}$  NMR spectra for  $[\text{OHC}_3\text{-4mpyc}][\text{Caff}]$

$^1\text{H}$  NMR ( $\text{D}_2\text{O}$ ): 2.20 (*m*, 2H,  $\text{CH}_2\text{-2}'$ ), 2.69 (*s*, 3H,  $\text{CH}_3$ ), 3.74 (*t*, 2H,  $J_{2',3'} = 6.1$  Hz,  $\text{CH}_2\text{OH}$ ), 4.67 (*t*, 2H,  $J_{1',2'} = 7.3$  Hz,  $\text{CH}_2\text{-1}'$ ), 5.49 (*d*, 2H, C-OH); 7.18, 7.24 and 7.33 (2xs, 5H, H-6, H-7, H-8, H-9, H-10); 7.91 (*d*, 1H,  $J = 6.3$  Hz, H-3 and H-5), 8.71 (*d*, 1H,  $J = 6.3$  Hz, H-2 and H-6)

$^{13}\text{C}$  NMR ( $\text{D}_2\text{O}$ ): 24.20 ( $\text{CH}_3$ ), 35.96 ( $\text{CH}_2\text{-2}'$ ), 61.62 ( $\text{HOCH}_2$ ), 61.95 ( $\text{CH}_2\text{-1}'$ ), 76.91 (C-OH); 131.55 (C3 and C-5), 135.94 (C-6); 136.65 (C-7), 137.22 (C-8); 146.14 (C-2 and C-6), 162.41 (C-4); 166.21 (C-9) and 181.02 ( $\text{COO}^-$ )



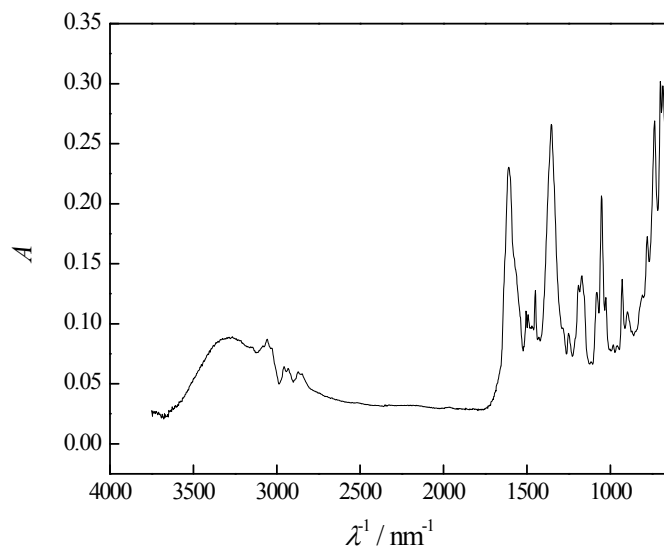

**Figure S44.** FTIR spectra of [OHC<sub>3</sub>-4mpyc][Caff]

3154 (stretching OH), 1482 (skeletal vibration of caffeate ring), 1398 and 1301 (C-N stretching), 1194 and 1155 (stretching OH group); 1102 and 1051(C-O stretching); 971 (CH wagging); 710 (C-O wagging)

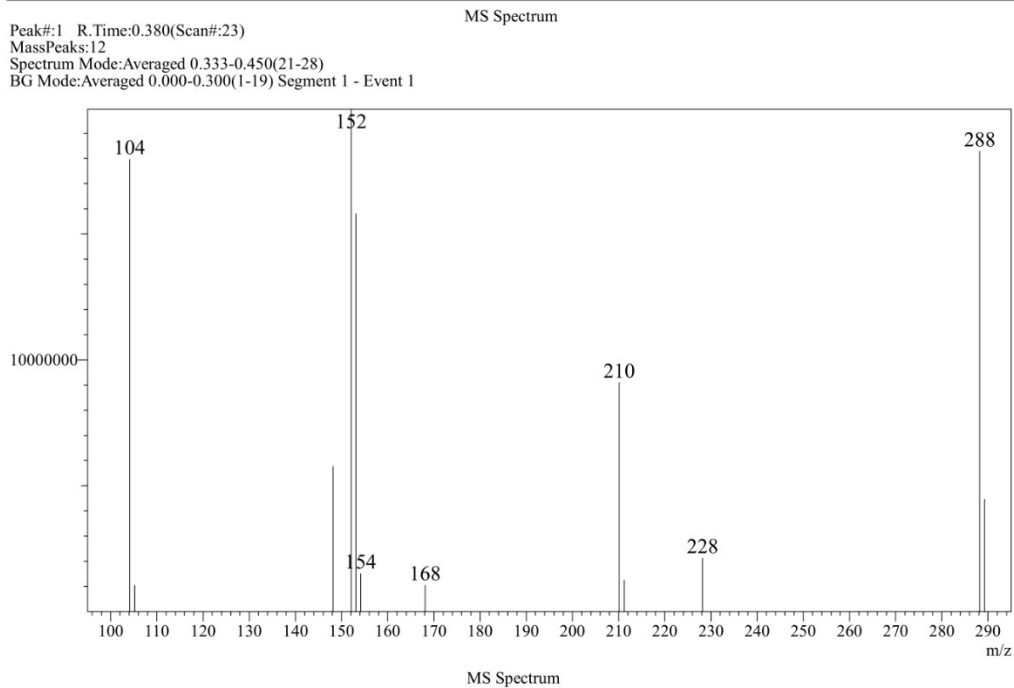

Peak#:1 R.Time:0.380(Scan#:23)  
 MassPeaks:12  
 Spectrum Mode:Averaged 0.333-0.450(21-28)  
 BG Mode:Averaged 0.000-0.300(1-19) Segment 1 - Event 1

| m/z    | Absolute Intensity | Relative Intensity |
|--------|--------------------|--------------------|
| 104.10 | 17961147           | 90.00              |
| 105.20 | 1043935            | 5.23               |
| 148.15 | 5761114            | 28.87              |
| 152.05 | 19956370           | 100.00             |
| 153.10 | 15798530           | 79.17              |
| 154.15 | 1509457            | 7.56               |

**Figure S45.** MS spectra of [OHC<sub>3</sub>-4mpyc][Caff]

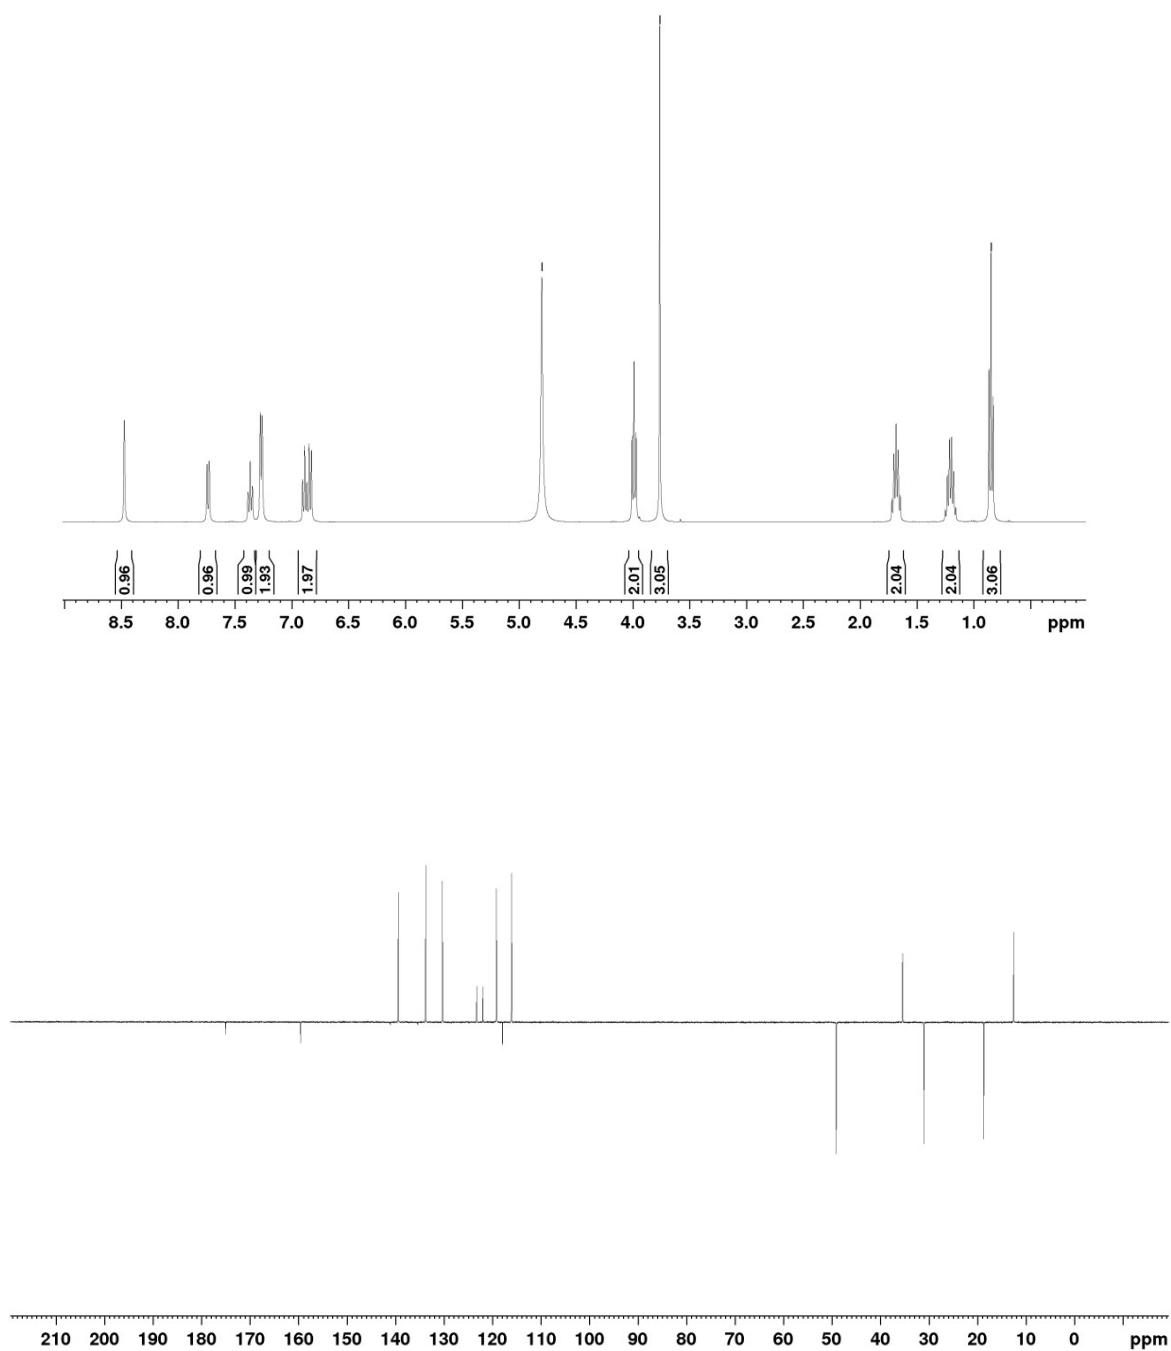

**Figure S46.**  $^1\text{H}$  and  $^{13}\text{C}$  NMR spectra for [bmim][Cin]

$^1\text{H}$  NMR (D<sub>2</sub>O): 2.31 (*m*. 2H.  $\text{NCH}_2\text{CH}_2\text{CH}_2\text{CH}_3$ ); 3.86 (*t*. 2H.  $J=6.1$  Hz.  $\text{NCH}_2\text{CH}_2\text{CH}_2\text{CH}_3$ ); 3.96 (*s*. 3H.  $\text{CH}_3$ ); 4.31 (*t*. 2H.  $J=7.1$  Hz.  $\text{NCH}_2\text{CH}_2\text{CH}_2\text{CH}_3$ ); 7.31, 7.38 and 7.41 (2xs, 5H, H-6, H-7, H-8, H-9, H-10); 7.61 and 7.67 (2xs. 2H. H-4 and H-5); 8.97 (*s*. 1H. H-2).

$^{13}\text{C}$  NMR (D<sub>2</sub>O): 31.44 ( $\text{NCH}_2\text{CH}_2\text{CH}_2\text{CH}_3$ ); 35.94 ( $\text{CH}_3$ ); 46.79 ( $\text{NCH}_2\text{CH}_2\text{CH}_2\text{CH}_3$ ); 57.86 ( $\text{NCH}_2\text{CH}_2\text{CH}_2\text{CH}_3$ ); 124.34 i 125.65 (C-4 i C-5); 129.65 (C-6); 130.21 (C-7), 130.86 (C-8); 135.11 (*d*. C-2); 141.73 (C-9) and 174.05 ( $\text{COO}^-$ )

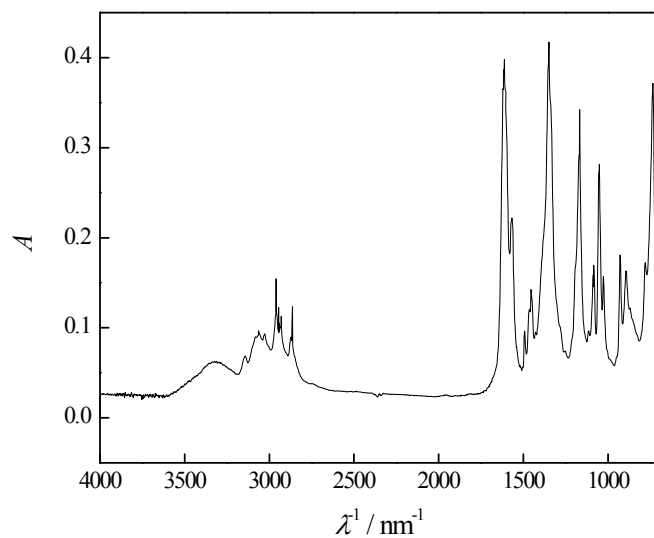

**Figure S47.** FTIR spectra of [bmim][Cin]

3216 (N-H stretching); 2949 (asym. stretching CH<sub>3</sub>), 2871 (sym. stretching CH<sub>3</sub>), 1506 (in plane vibrations of imidazolium ring), 1491(skeletal vibration of cinnamate), 1447 and 1362 (C-N stretching), 1218 (stretching OH group); 1161 and 1068 (C-O stretching); 959 (CH wagging); 771 (C-O wagging)

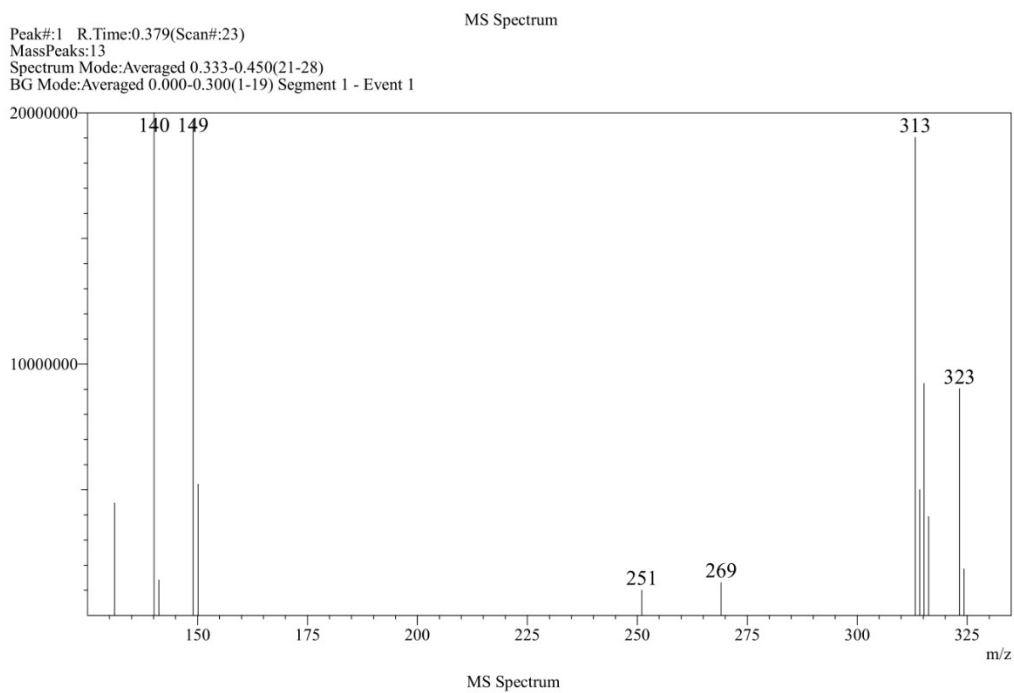

Peak#:1 R.Time:0.379(Scan#:23)  
 MassPeaks:13  
 Spectrum Mode:Averaged 0.333-0.450(21-28)  
 BG Mode:Averaged 0.000-0.300(1-19) Segment 1 - Event 1

| m/z    | Absolute Intensity | Relative Intensity |
|--------|--------------------|--------------------|
| 131.10 | 4484608            | 22.42              |
| 140.10 | 20000000           | 100.00             |
| 141.20 | 1414293            | 7.07               |
| 149.00 | 19726846           | 98.63              |
| 150.10 | 5229895            | 26.15              |
| 251.05 | 1011919            | 5.06               |

**Figure S48.** MS spectra of [bmim][Cin]

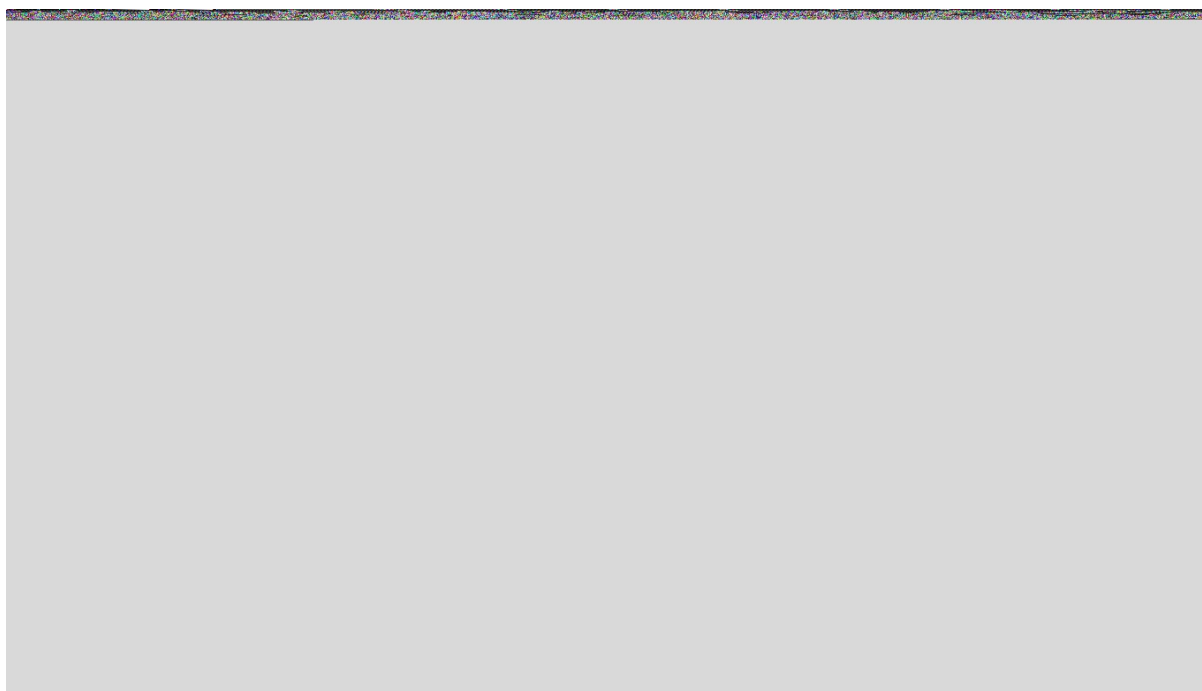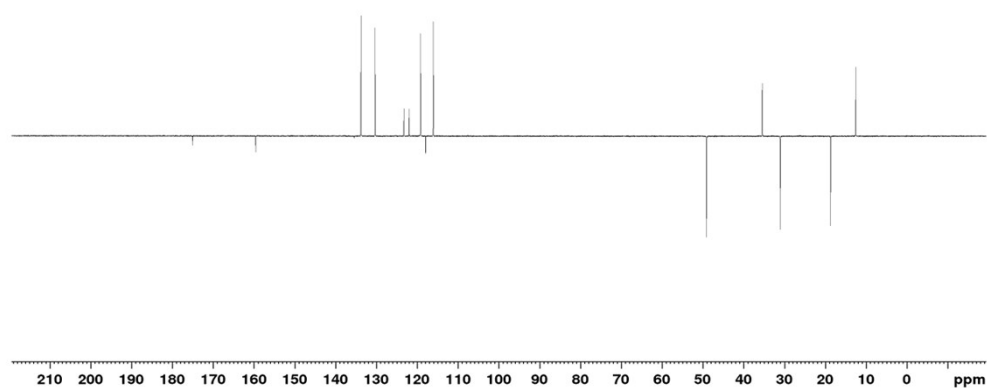

**Figure S49.**  $^1\text{H}$  and  $^{13}\text{C}$  NMR spectra for [bmim][Man]

$^1\text{H}$  NMR ( $\text{D}_2\text{O}$ ):  $^1\text{H}$  NMR ( $\text{D}_2\text{O}$ ): 2.11 (*m*. 2H.  $\text{NCH}_2\text{CH}_2\text{CH}_2\text{CH}_3$ ); 3.67 (*t*. 2H.  $J=6.1$  Hz.  $\text{NCH}_2\text{CH}_2\text{CH}_2\text{CH}_3$ ); 3.96 (*s*. 3H.  $\text{CH}_3$ ); 4.34 (*t*. 2H.  $J=7.1$  Hz.  $\text{NCH}_2\text{CH}_2\text{CH}_2\text{CH}_3$ ); 5.26 ( $\text{NCH}_2\text{CH}_2\text{CH}_2\text{CH}_3$ ); 7.29, 7.38 and 7.41 (2xs, 5H, H-6, H-7, H-8, H-9, H-10); 7.51 and 7.52 (2xs. 2H. H-4 and H-5); 8.91 (*s*. 1H. H-2).

$^{13}\text{C}$  NMR ( $\text{D}_2\text{O}$ ): 31.22 ( $\text{NCH}_2\text{CH}_2\text{CH}_2\text{CH}_3$ ); 35.81 ( $\text{CH}_3$ ); 46.79 ( $\text{NCH}_2\text{CH}_2\text{CH}_2\text{CH}_3$ ); 57.93 ( $\text{NCH}_2\text{CH}_2\text{CH}_2\text{CH}_3$ ); 77.44 ( $\text{NCH}_2\text{CH}_2\text{CH}_2\text{CH}_3$ ); 122.34 i 123.65 (C-4 i C-5); 129.05 (C-6); 130.21 (C-7), 130.56 (C-8); 136.02 (*d*. C-2); 142.73 (C-9) and 176.01 ( $\text{COO}^-$ )

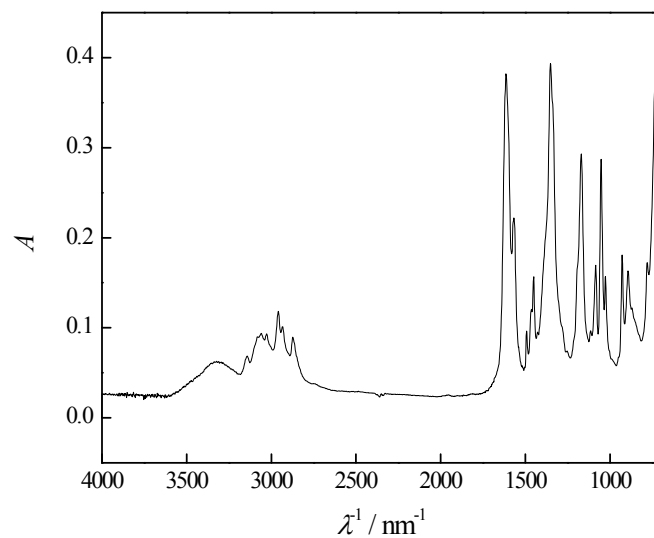

**Figure S50.** FTIR spectra of [bmim][Man]

3189 (N-H stretching); 2965 (asym. stretching CH<sub>3</sub>), 2877 (sym. stretching CH<sub>3</sub>), 1609 (ring deformation mandelate), 1577 (in plane vibration imidazolium ring), 1444 and 1351 (C-N stretching); 1169 and 1036 (C-O stretching); 926 (CH wagging); 741 (C-O wagging)

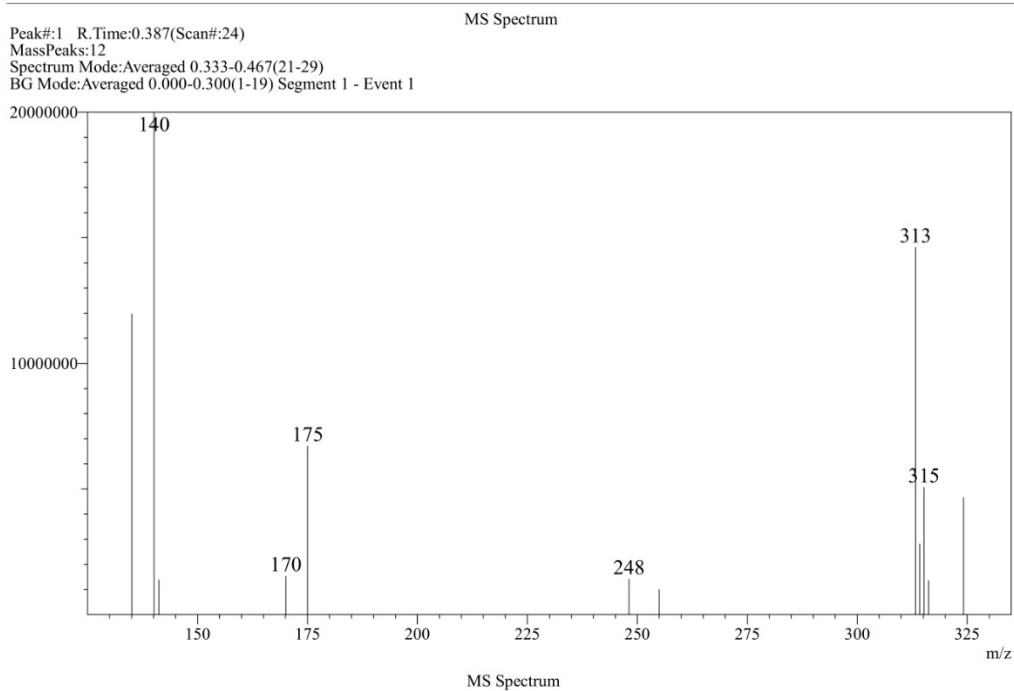

Peak#:1 R.Time:0.387(Scan#:24)  
 MassPeaks:12  
 Spectrum Mode:Averaged 0.333-0.467(21-29)  
 BG Mode:Averaged 0.000-0.300(1-19) Segment 1 - Event 1

| m/z    | Absolute Intensity | Relative Intensity |
|--------|--------------------|--------------------|
| 135.05 | 11978178           | 59.89              |
| 140.10 | 20000000           | 100.00             |
| 141.20 | 1379709            | 6.90               |
| 170.10 | 1525178            | 7.63               |
| 175.05 | 6707124            | 33.54              |
| 248.10 | 1413984            | 7.07               |

**Figure S51.** MS spectra of [bmim][Man]



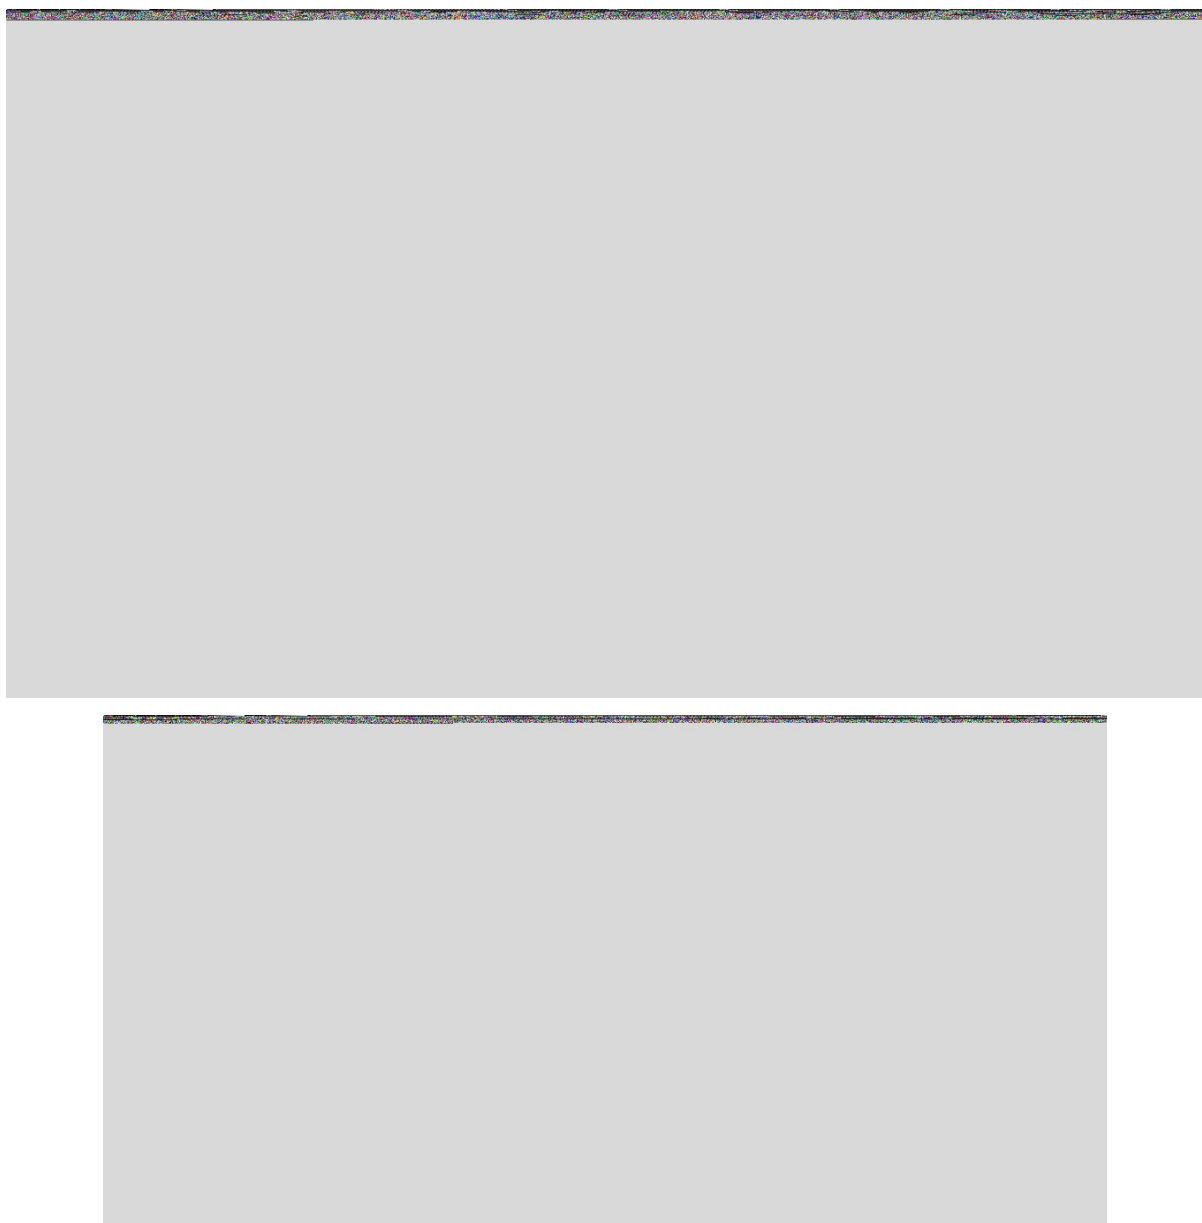

**Figure S52.**  $^1\text{H}$  and  $^{13}\text{C}$  NMR spectra for [bmim][Caff]

$^1\text{H}$  NMR ( $\text{D}_2\text{O}$ ):  $^1\text{H}$  NMR ( $\text{D}_2\text{O}$ ): 2.09 (*m*. 2H.  $\text{NCH}_2\text{CH}_2\text{CH}_2\text{CH}_3$ ); 3.71 (*t*. 3H.  $\text{J}=6.1$  Hz.  $\text{NCH}_2\text{CH}_2\text{CH}_2\text{CH}_3$ ); 3.82 (*s*. 3H.  $\text{CH}_3$ ); 4.31(*t*. 2H.  $\text{J}=7.1$  Hz.  $\text{NCH}_2\text{CH}_2\text{CH}_2\text{CH}_3$ ); 5.29 (*s*, 3H,  $\text{NCH}_2\text{CH}_2\text{CH}_2\text{CH}_3$ ); 7.29, 7.38 and 7.40 (2xs, 5H, H-6, H-7, H-8, H-9, H-10); 7.54 and 7.58 (2xs. 2H. H-4 and H-5); 8.82 (*s*. 1H. H-2).

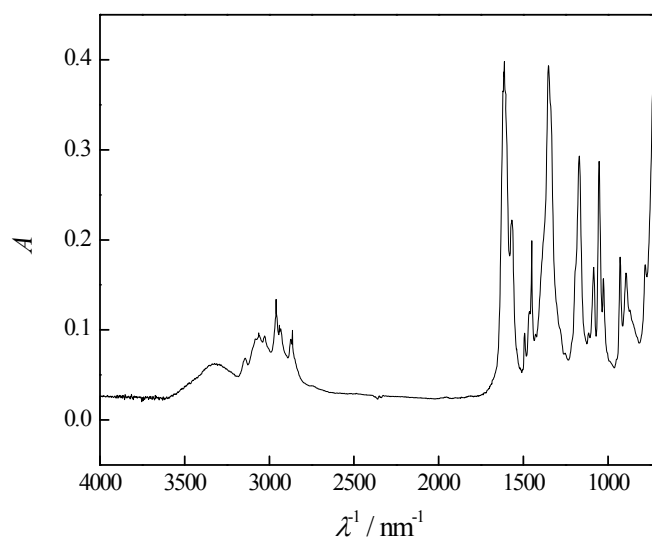

**Figure S53.** FTIR spectra of [bmim][Caff]

3198 (N-H stretching); 2976 (asym. stretching CH<sub>3</sub>), 2894 (sym. stretching CH<sub>3</sub>), 1501 (in plane vibrations of imidazolium ring), 1434 (skeletal vibration of caffeate ring), 1445 and 1362 (C-N stretching), 1218 and 1183 (stretching OH group); 1151 and 1062 (C-O stretching); 961 (CH wagging); 704 (C-O wagging)

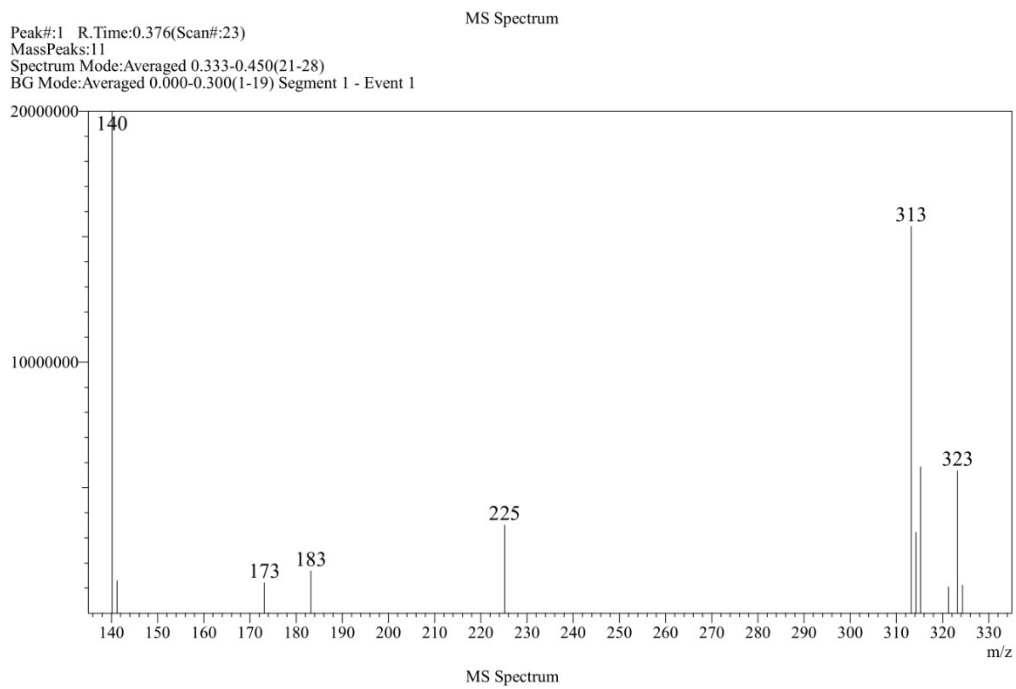

Peak#:1 R.Time:0.376(Scan#:23)  
 MassPeaks:11  
 Spectrum Mode:Averaged 0.333-0.450(21-28)  
 BG Mode:Averaged 0.000-0.300(1-19) Segment 1 - Event 1

| m/z    | Absolute Intensity | Relative Intensity |
|--------|--------------------|--------------------|
| 140.10 | 20000000           | 100.00             |
| 141.20 | 1300361            | 6.50               |
| 173.10 | 1210078            | 6.05               |
| 183.20 | 1685438            | 8.43               |
| 225.15 | 3511997            | 17.56              |

**Figure S54.** MS spectra of [bmim][Caff]

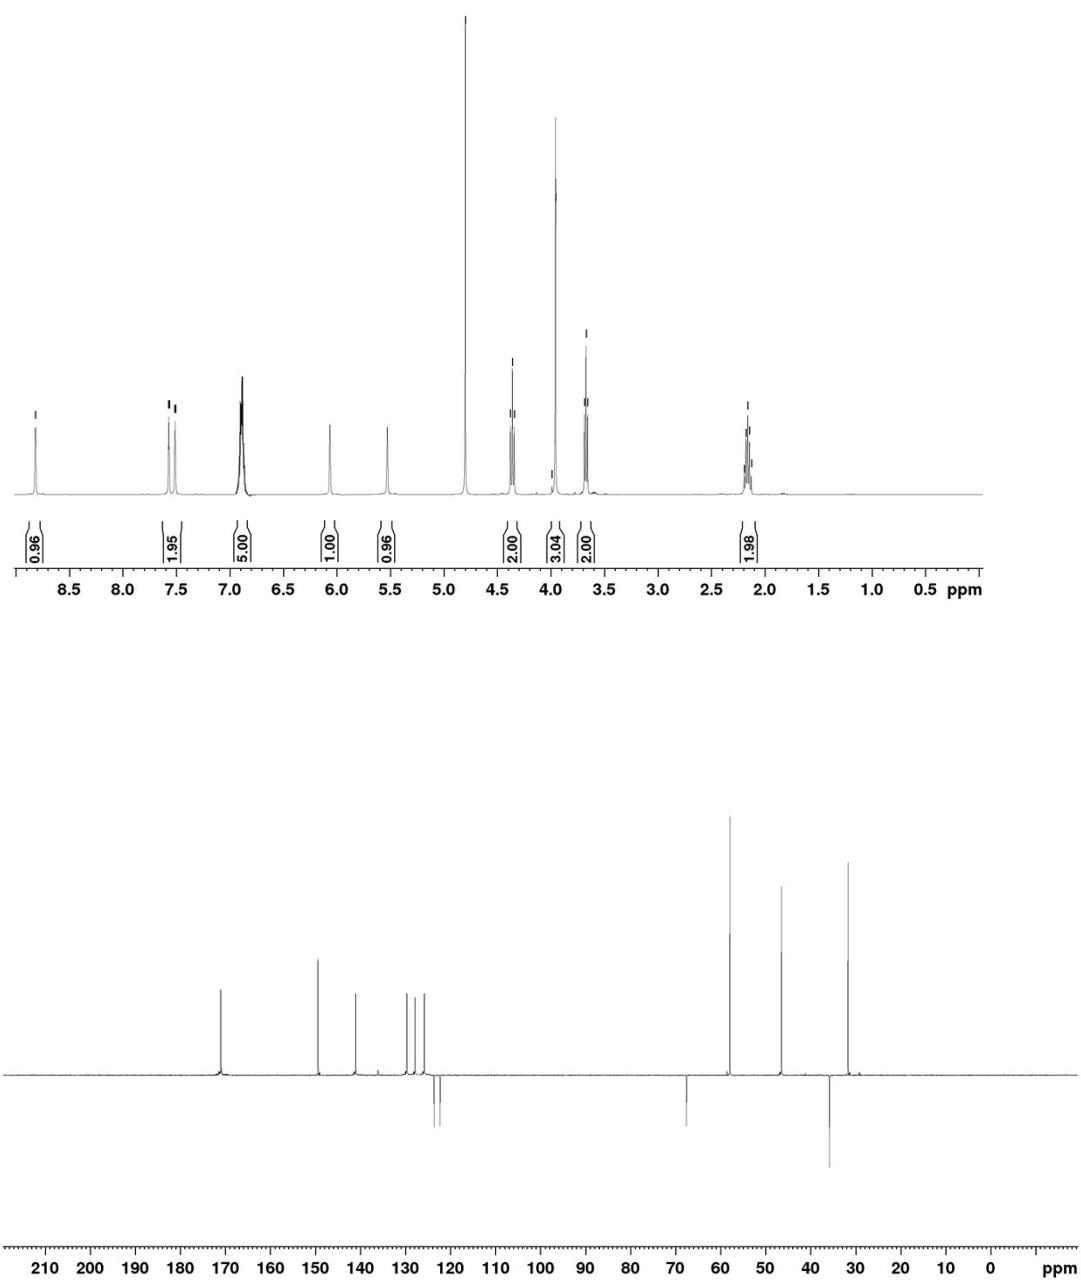

**Figure S55.**  $^1\text{H}$  and  $^{13}\text{C}$  NMR spectra for  $[\text{OHC}_3\text{mim}][\text{Cin}]$

$^1\text{H}$  NMR ( $\text{D}_2\text{O}$ ): 2.31 (*m*. 2H.  $\text{NCH}_2\text{CH}_2\text{CH}_2\text{OH}$ ); 3.83 (*t*. 2H.  $J=6.1$  Hz.  $\text{NCH}_2\text{CH}_2\text{CH}_2\text{OH}$ ); 3.96 (*s*. 3H.  $\text{CH}_3$ ); 4.31 (*t*. 2H.  $J=7.1$  Hz.  $\text{NCH}_2\text{CH}_2\text{CH}_2\text{OH}$ ); 7.29, 7.38 and 7.41 (2xs, 5H, H-6, H-7, H-8, H-9, H-10); 7.61 and 7.67 (2xs. 2H. H-4 and H-5); 8.93 (*s*. 1H. H-2).

$^{13}\text{C}$  NMR ( $\text{D}_2\text{O}$ ): 31.44 ( $\text{NCH}_2\text{CH}_2\text{CH}_2\text{OH}$ ); 35.94 ( $\text{CH}_3$ ); 46.79 ( $\text{NCH}_2\text{CH}_2\text{CH}_2\text{OH}$ ); 57.93 ( $\text{NCH}_2\text{CH}_2\text{CH}_2\text{OH}$ ); 124.34 i 125.65 (C-4 i C-5); 129.65 (C-6); 130.21 (C-7), 130.86 (C-8); 136.11 (*d*. C-2); 142.73 (C-9) and 177.05 ( $\text{COO}^-$ )

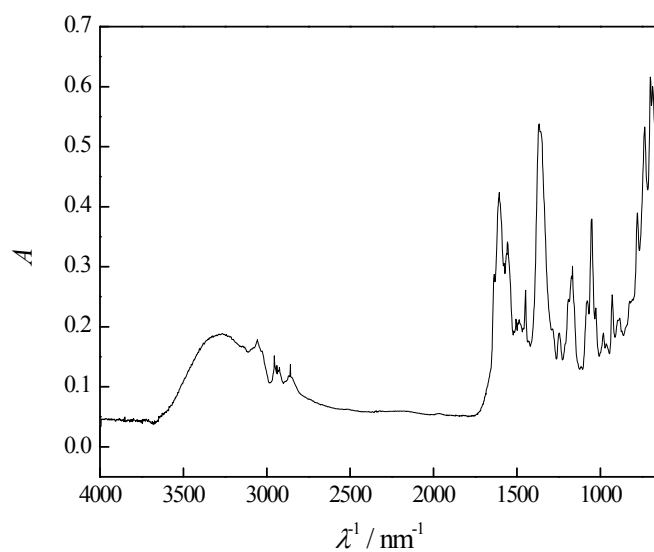

**Figure S56.** FTIR spectra of [OHC<sub>3</sub>mim][Cin]

3079 (stretching OH), 2946 (asym. stretching CH<sub>3</sub>), 2845 (sym. stretching CH<sub>3</sub>), 1555 (in plane vibrations of imidazolium ring), 1494 (skeletal vibration of cinnamate), 1447 and 1362 (C-N stretching), 1165 and 1072 (C-O stretching); 956 (CH wagging); 774 (C-O wagging)

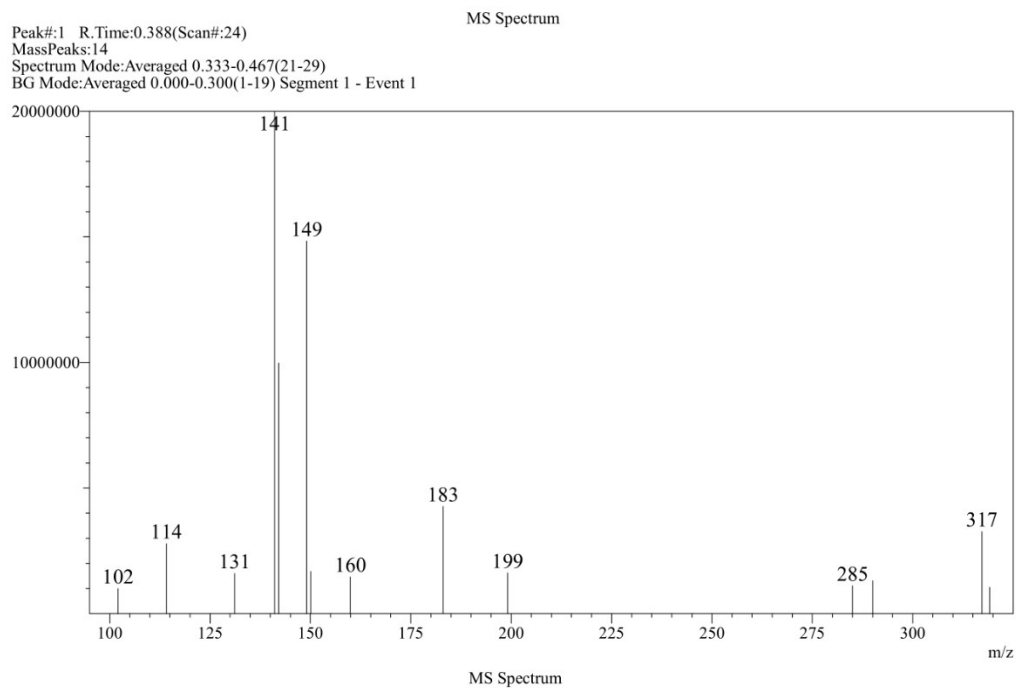

Peak#:1 R.Time:0.388(Scan#:24)  
 MassPeaks:14  
 Spectrum Mode:Averaged 0.333-0.467(21-29)  
 BG Mode:Averaged 0.000-0.300(1-19) Segment 1 - Event 1

| m/z    | Absolute Intensity | Relative Intensity |
|--------|--------------------|--------------------|
| 102.10 | 1005451            | 5.03               |
| 114.10 | 2792919            | 13.96              |
| 131.10 | 1605059            | 8.03               |
| 141.05 | 20000000           | 100.00             |
| 142.10 | 9981920            | 49.91              |
| 149.05 | 14834534           | 74.17              |
| 150.10 | 1687353            | 8.44               |

**Figure S57.** MS spectra of [OHC<sub>3</sub>mim][Cin]

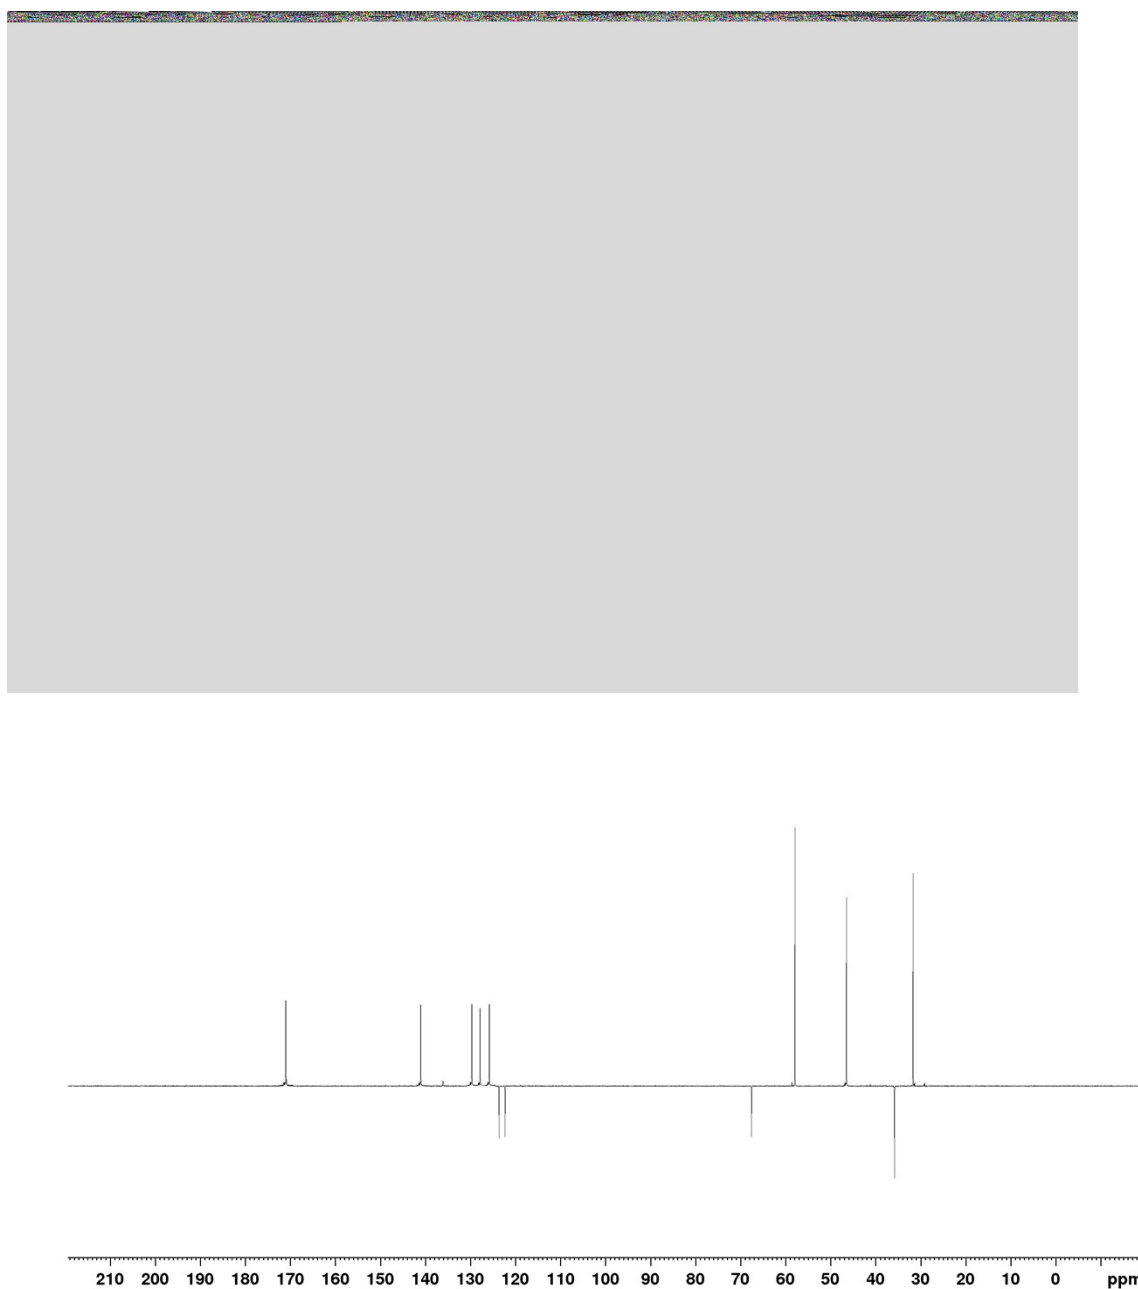

**Figure S58.**  $^1\text{H}$  and  $^{13}\text{C}$  NMR spectra for  $[\text{OHC}_3\text{mim}][\text{Man}]$

$^1\text{H}$  NMR ( $\text{D}_2\text{O}$ ):  $^1\text{H}$  NMR ( $\text{D}_2\text{O}$ ): 2.16 (*m*. 2H.  $\text{NCH}_2\text{CH}_2\text{CH}_2\text{OH}$ ); 3.67 (*t*. 2H.  $J=6.1$  Hz.  $\text{NCH}_2\text{CH}_2\text{CH}_2\text{OH}$ ); 3.96 (*s*. 3H.  $\text{CH}_3$ ); 4.36 (*t*. 2H.  $J=7.1$  Hz.  $\text{NCH}_2\text{CH}_2\text{CH}_2\text{OH}$ ); 5.26 (*C-OH*); 7.29, 7.38 and 7.41 (2xs, 5H, H-6, H-7, H-8, H-9, H-10); 7.51 and 7.57 (2xs. 2H. H-4 and H-5); 8.82 (*s*. 1H. H-2).

$^{13}\text{C}$  NMR ( $\text{D}_2\text{O}$ ): 31.49 ( $\text{NCH}_2\text{CH}_2\text{CH}_2\text{OH}$ ); 35.81 ( $\text{CH}_3$ ); 46.79 ( $\text{NCH}_2\text{CH}_2\text{CH}_2\text{OH}$ ); 57.93 ( $\text{NCH}_2\text{CH}_2\text{CH}_2\text{OH}$ ); 75.44 (*C-OH*); 122.34 i 123.65 (C-4 i C-5); 129.05 (C-6); 130.21 (C-7), 130.86 (C-8); 136.11 (*d*. C-2); 142.73 (C-9) and 176.01 ( $\text{COO}^-$ )

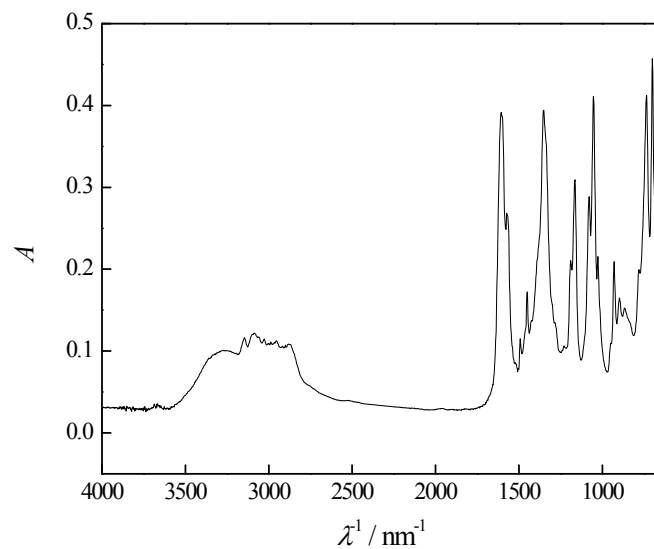

**Figure S59.** FTIR spectra of [OHC<sub>3</sub>mim][Man]

3204 (stretching vibration OH from mandelate), 3086 (stretching OH), 2954 (asym. stretching CH<sub>3</sub>), 1606 (ring deformation mandelate), 1572 (in plane vibration imidazolium ring), 1451 and 1352 (C-N stretching); 1165 and 1053 (C-O stretching); 928 (CH wagging); 735 (C-O wagging)



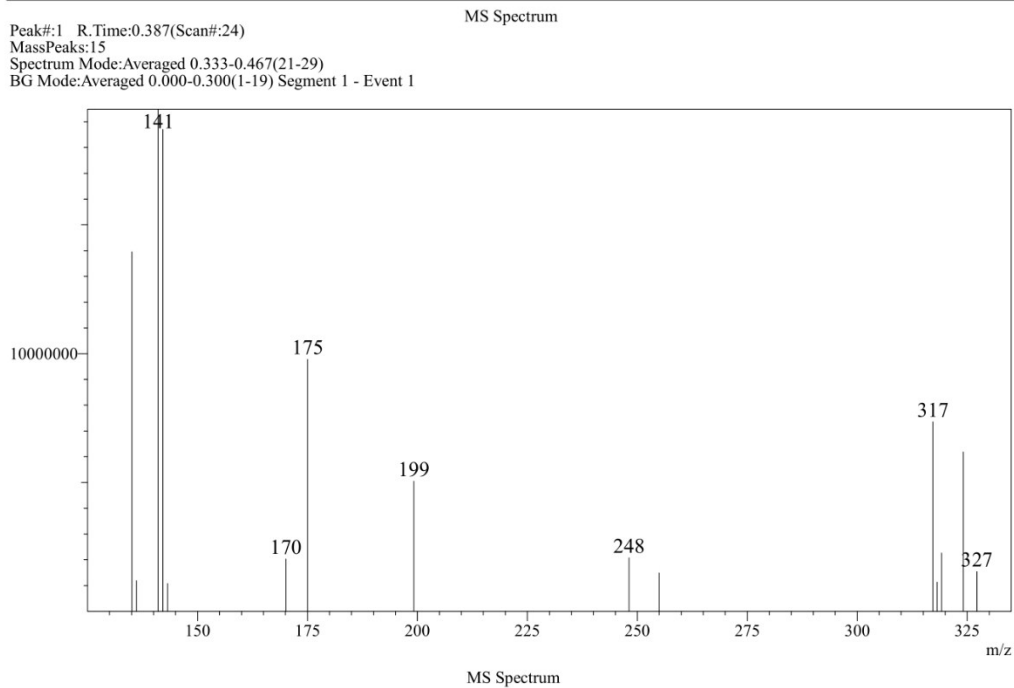

Peak#:1 R.Time:0.387(Scan#:24)  
 MassPeaks:15  
 Spectrum Mode:Averaged 0.333-0.467(21-29)  
 BG Mode:Averaged 0.000-0.300(1-19) Segment 1 - Event 1

| m/z    | Absolute Intensity | Relative Intensity |
|--------|--------------------|--------------------|
| 135.05 | 13960292           | 71.63              |
| 136.10 | 1190379            | 6.11               |
| 141.00 | 19488990           | 100.00             |
| 142.10 | 18711759           | 96.01              |
| 143.20 | 1086124            | 5.57               |
| 170.10 | 2032978            | 10.43              |
| 175.05 | 9783340            | 50.20              |
| 199.15 | 5056877            | 25.95              |

**Figure S60.** MS spectra of [OHC<sub>3</sub>mim][Man]

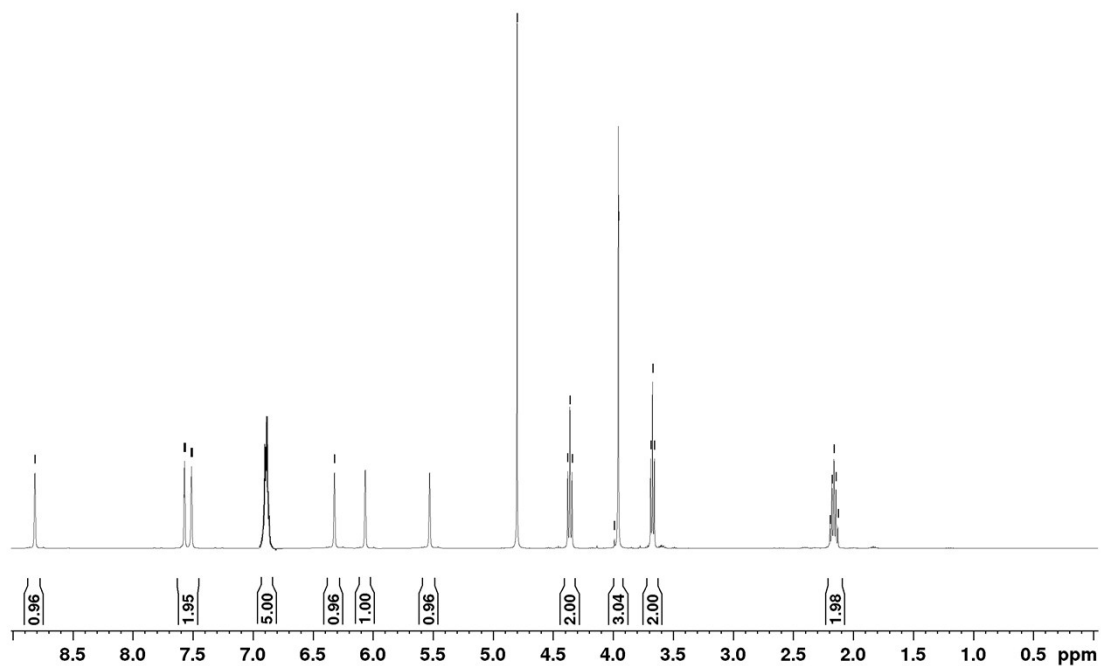

**Figure S61.**  $^1\text{H}$  and  $^{13}\text{C}$  NMR spectra for  $[\text{OHC}_3\text{mim}][\text{Caff}]$

$^1\text{H}$  NMR ( $\text{D}_2\text{O}$ ):  $^1\text{H}$  NMR ( $\text{D}_2\text{O}$ ): 2.19 (*m*. 2H.  $\text{NCH}_2\text{CH}_2\text{CH}_2\text{OH}$ ); 3.71 (*t*. 2H.  $\text{J}=6.1$  Hz.  $\text{NCH}_2\text{CH}_2\text{CH}_2\text{OH}$ ); 3.89 (*s*. 3H.  $\text{CH}_3$ ); 4.39 (*t*. 2H.  $\text{J}=7.1$  Hz.  $\text{NCH}_2\text{CH}_2\text{CH}_2\text{OH}$ ); 5.29 (*s*, 2H, C-OH); 7.29, 7.38 and 7.41 (2xs, 5H, H-6, H-7, H-8, H-9, H-10); 7.54 and 7.59 (2xs. 2H. H-4 and H-5); 8.86 (*s*. 1H. H-2).

$^{13}\text{C}$  NMR ( $\text{D}_2\text{O}$ ): 31.82 ( $\text{NCH}_2\text{CH}_2\text{CH}_2\text{OH}$ ); 36.22 ( $\text{CH}_3$ ); 46.75 ( $\text{NCH}_2\text{CH}_2\text{CH}_2\text{OH}$ ); 57.93 ( $\text{NCH}_2\text{CH}_2\text{CH}_2\text{OH}$ ); 75.73 and 77.29 (C-12 and C-13); 122.34 and 123.65 (C-4 and C-5); 131.25 (C-6); 132.28 (C-7), 133.46 (C-8); 136.11 (*d*. C-2); 142.73 (C-9) and 179.81 ( $\text{COO}^-$ )

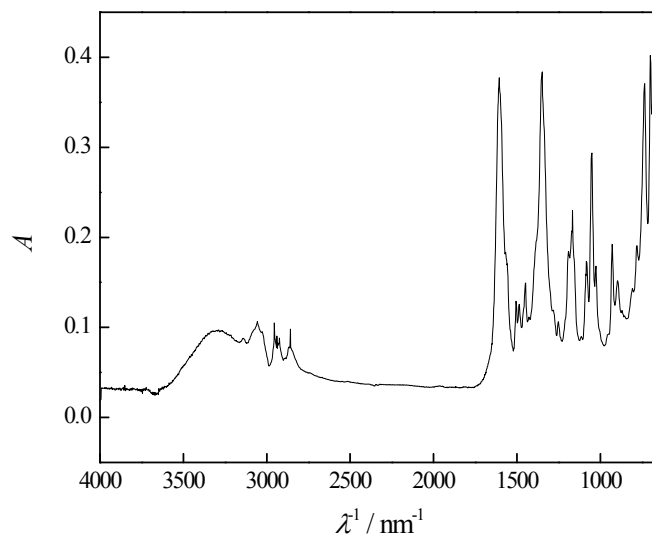

**Figure S62.** FTIR spectra of [OHC<sub>3</sub>mim][Caff]

3126 (stretching OH), 2945 (asym. stretching CH<sub>3</sub>), 2849 (sym. stretching CH<sub>3</sub>), 1533 (in plane vibrations of imidazolium ring), 1442 (skeletal vibration of caffeate ring), 1401 and 1318 (C-N stretching), 1224 and 1189 (stretching OH group); 1144 and 1069 (C-O stretching); 962 (CH wagging); 705 (C-O wagging)

MS Spectrum  
Peak#:1 R.Time:0.377(Scan#:23)  
MassPeaks:11  
Spectrum Mode:Averaged 0.333-0.450(21-28)  
BG Mode:Averaged 0.000-0.300(1-19) Segment 1 - Event 1

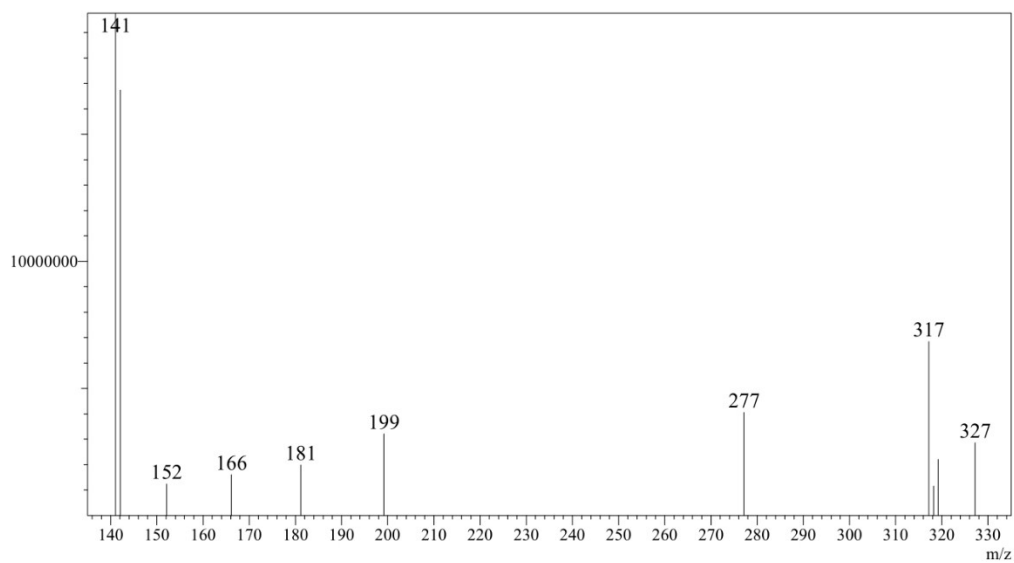

MS Spectrum

Peak#:1 R.Time:0.377(Scan#:23)  
MassPeaks:11  
Spectrum Mode:Averaged 0.333-0.450(21-28)  
BG Mode:Averaged 0.000-0.300(1-19) Segment 1 - Event 1

| m/z    | Absolute Intensity | Relative Intensity |
|--------|--------------------|--------------------|
| 141.05 | 19768066           | 100.00             |
| 142.10 | 16745920           | 84.71              |
| 152.10 | 1240776            | 6.28               |
| 166.10 | 1602845            | 8.11               |
| 181.15 | 1996079            | 10.10              |

**Figure S63.** MS spectra of [OHC<sub>3</sub>mim][Caff]
